# Supplementary material for: Phylogenetic and Molecular Characteristics of Wild Bird‐Origin Avian Influenza Viruses Circulating in Poland in 2018−2022: Reassortment, Multiple Introductions, and Wild Bird–Poultry Epidemiological Links
Source: Hindawi journal article supplement (doi:10.1155/2024/6661672), 2024-01-01

## Phylogenetic trees of all eight AIV gene segments

HPAI H5Nx 2020/2021 – colored as follows:

H5N8 sequences (one genotype) – red

H5N1 sequence (single event) – red ▲

H5N5 sequence (single event) – red ●

HPAI H5Nx 2021/2022 – colored as follows:

H5N1 genotypes:

G1 – pink

G2 – dark blue

G3 – salmon

G4 – orange

G5 – light blue

G6 – dark yellow

G7 – purple

LPAIVs from active surveillance + MB152/22 - green

Wild bird-poultry connections – marked as follows:

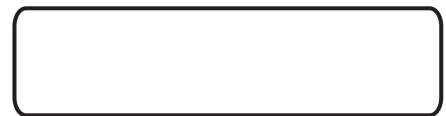

H5N8 introductions - marked as follows:

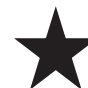

PB2

Best-fit model: GTR+F+G4

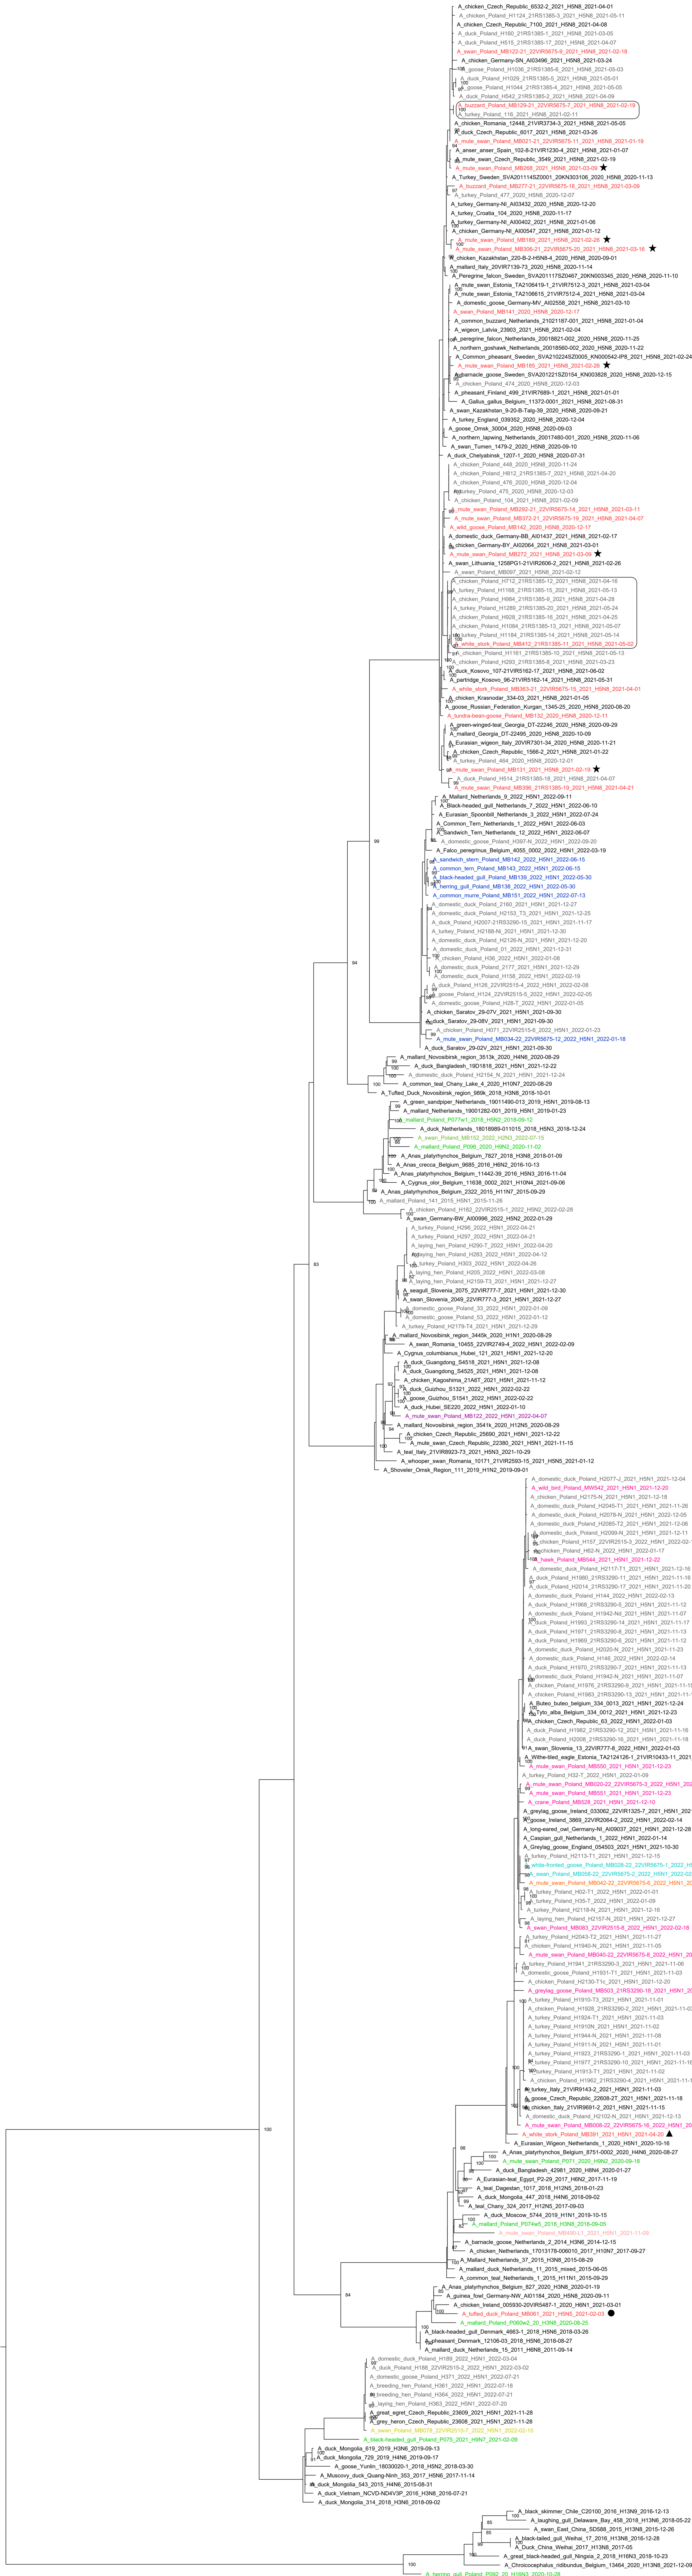

PB1

Best-fit model: GTR+F+G4

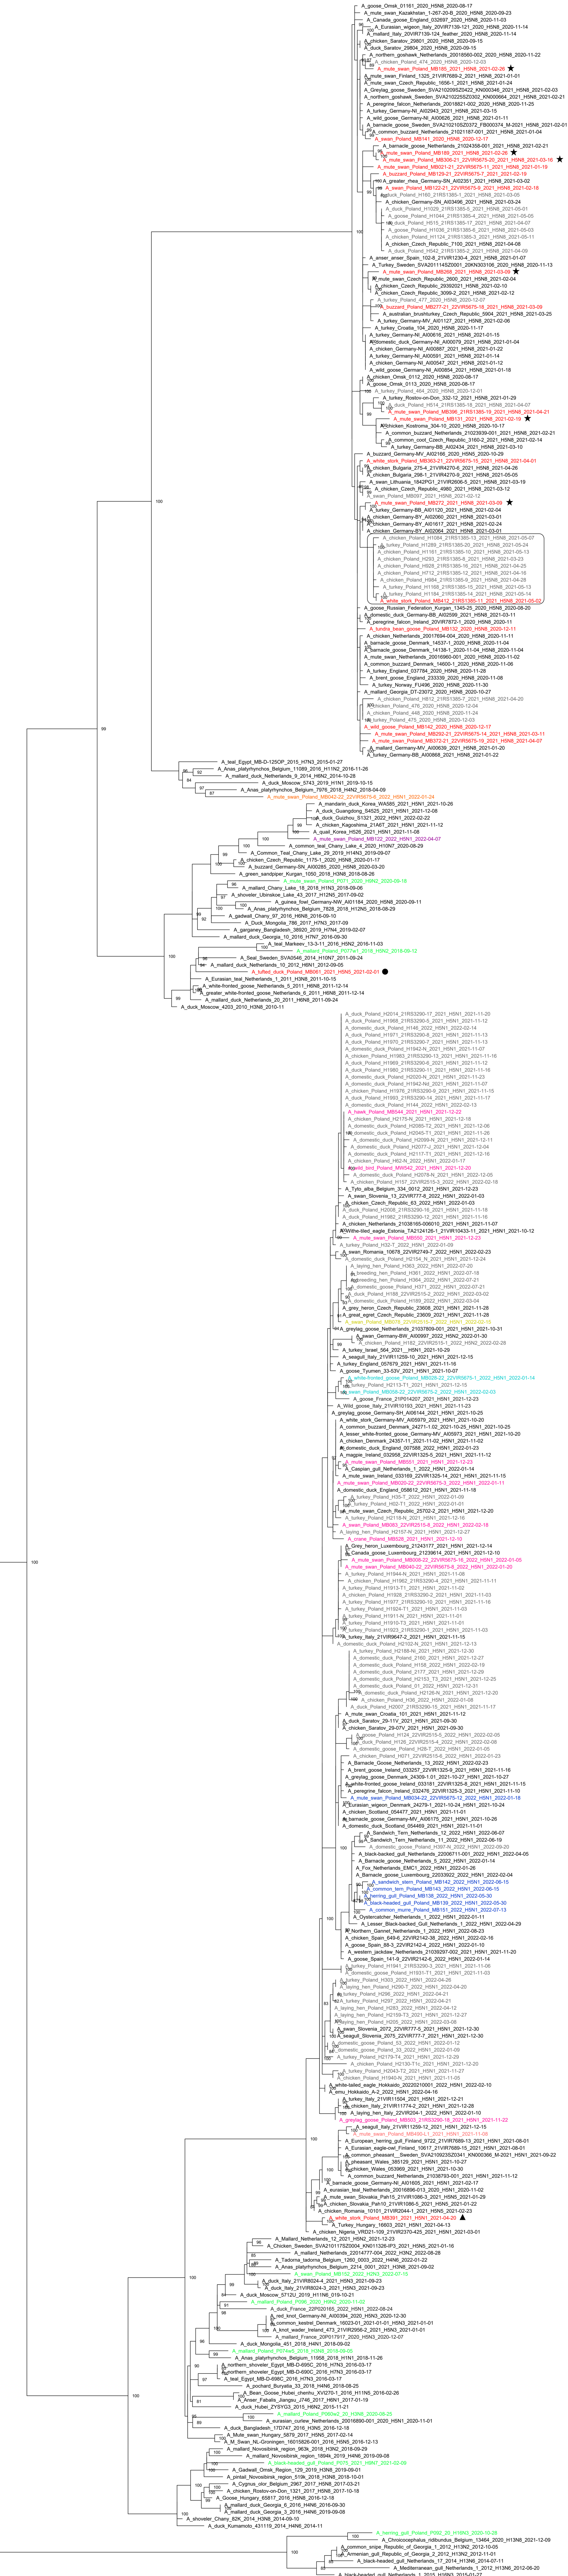

PA

Best-fit model: TVM+F+G4

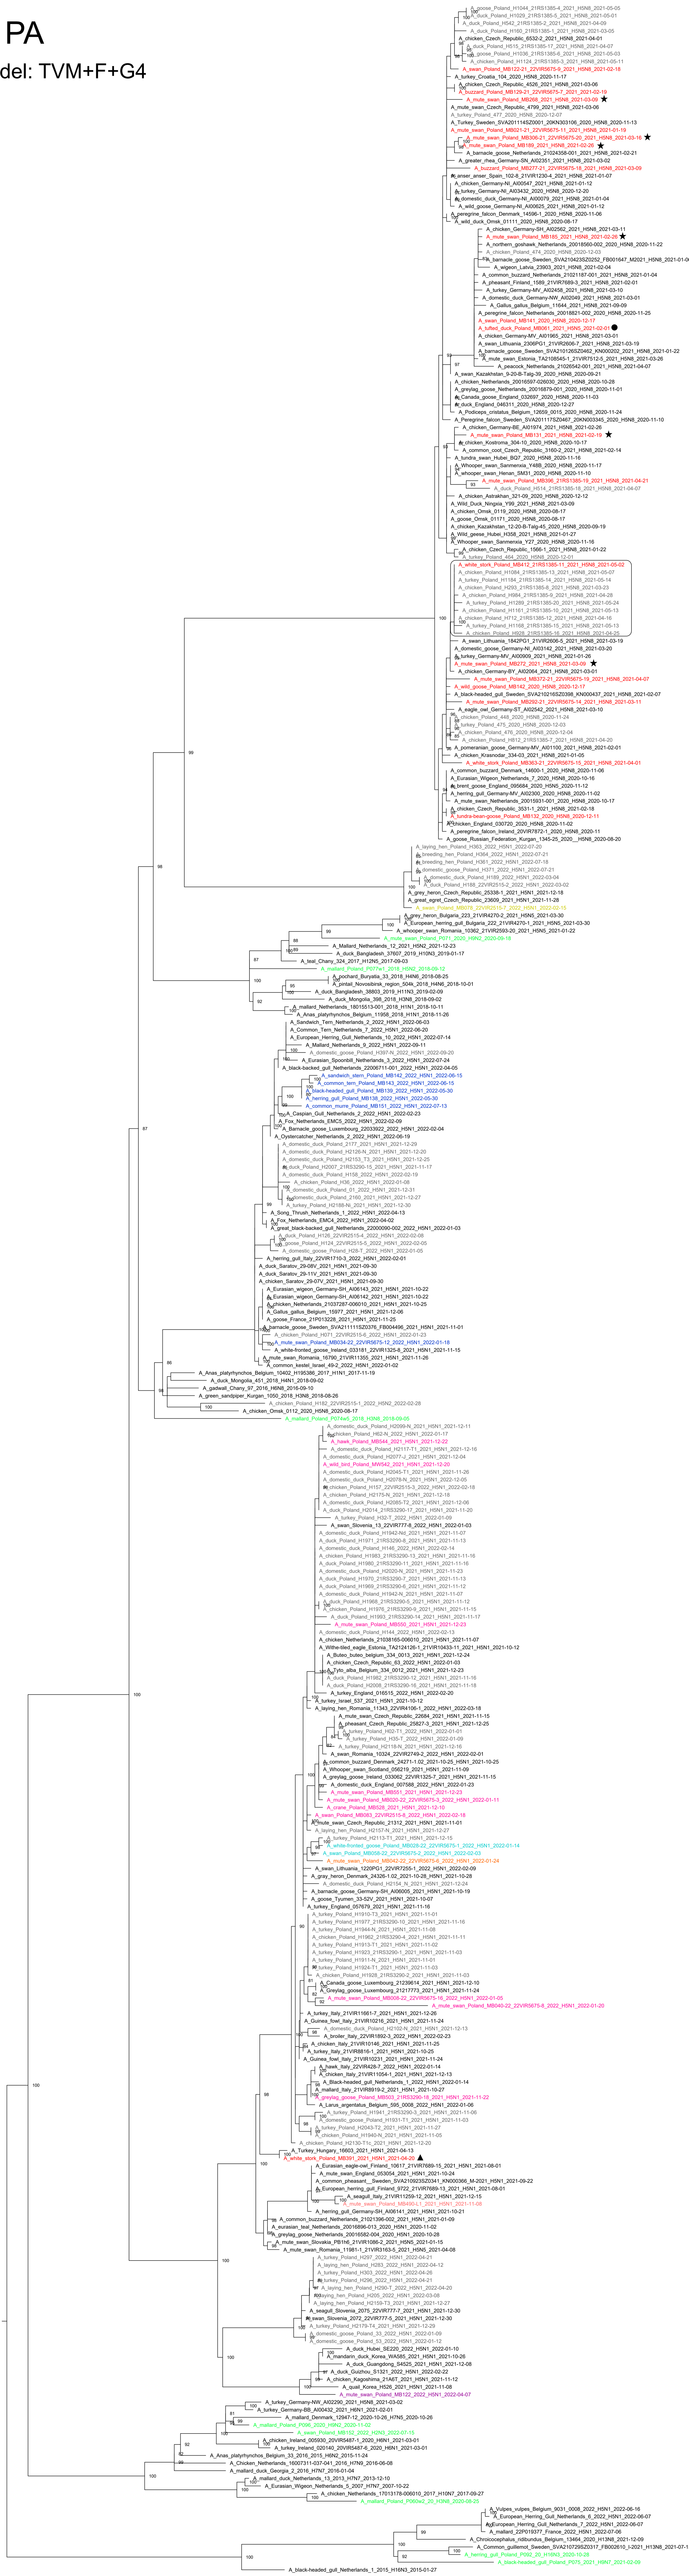

# HA - H2

Best-fit model: TIM+F+G4

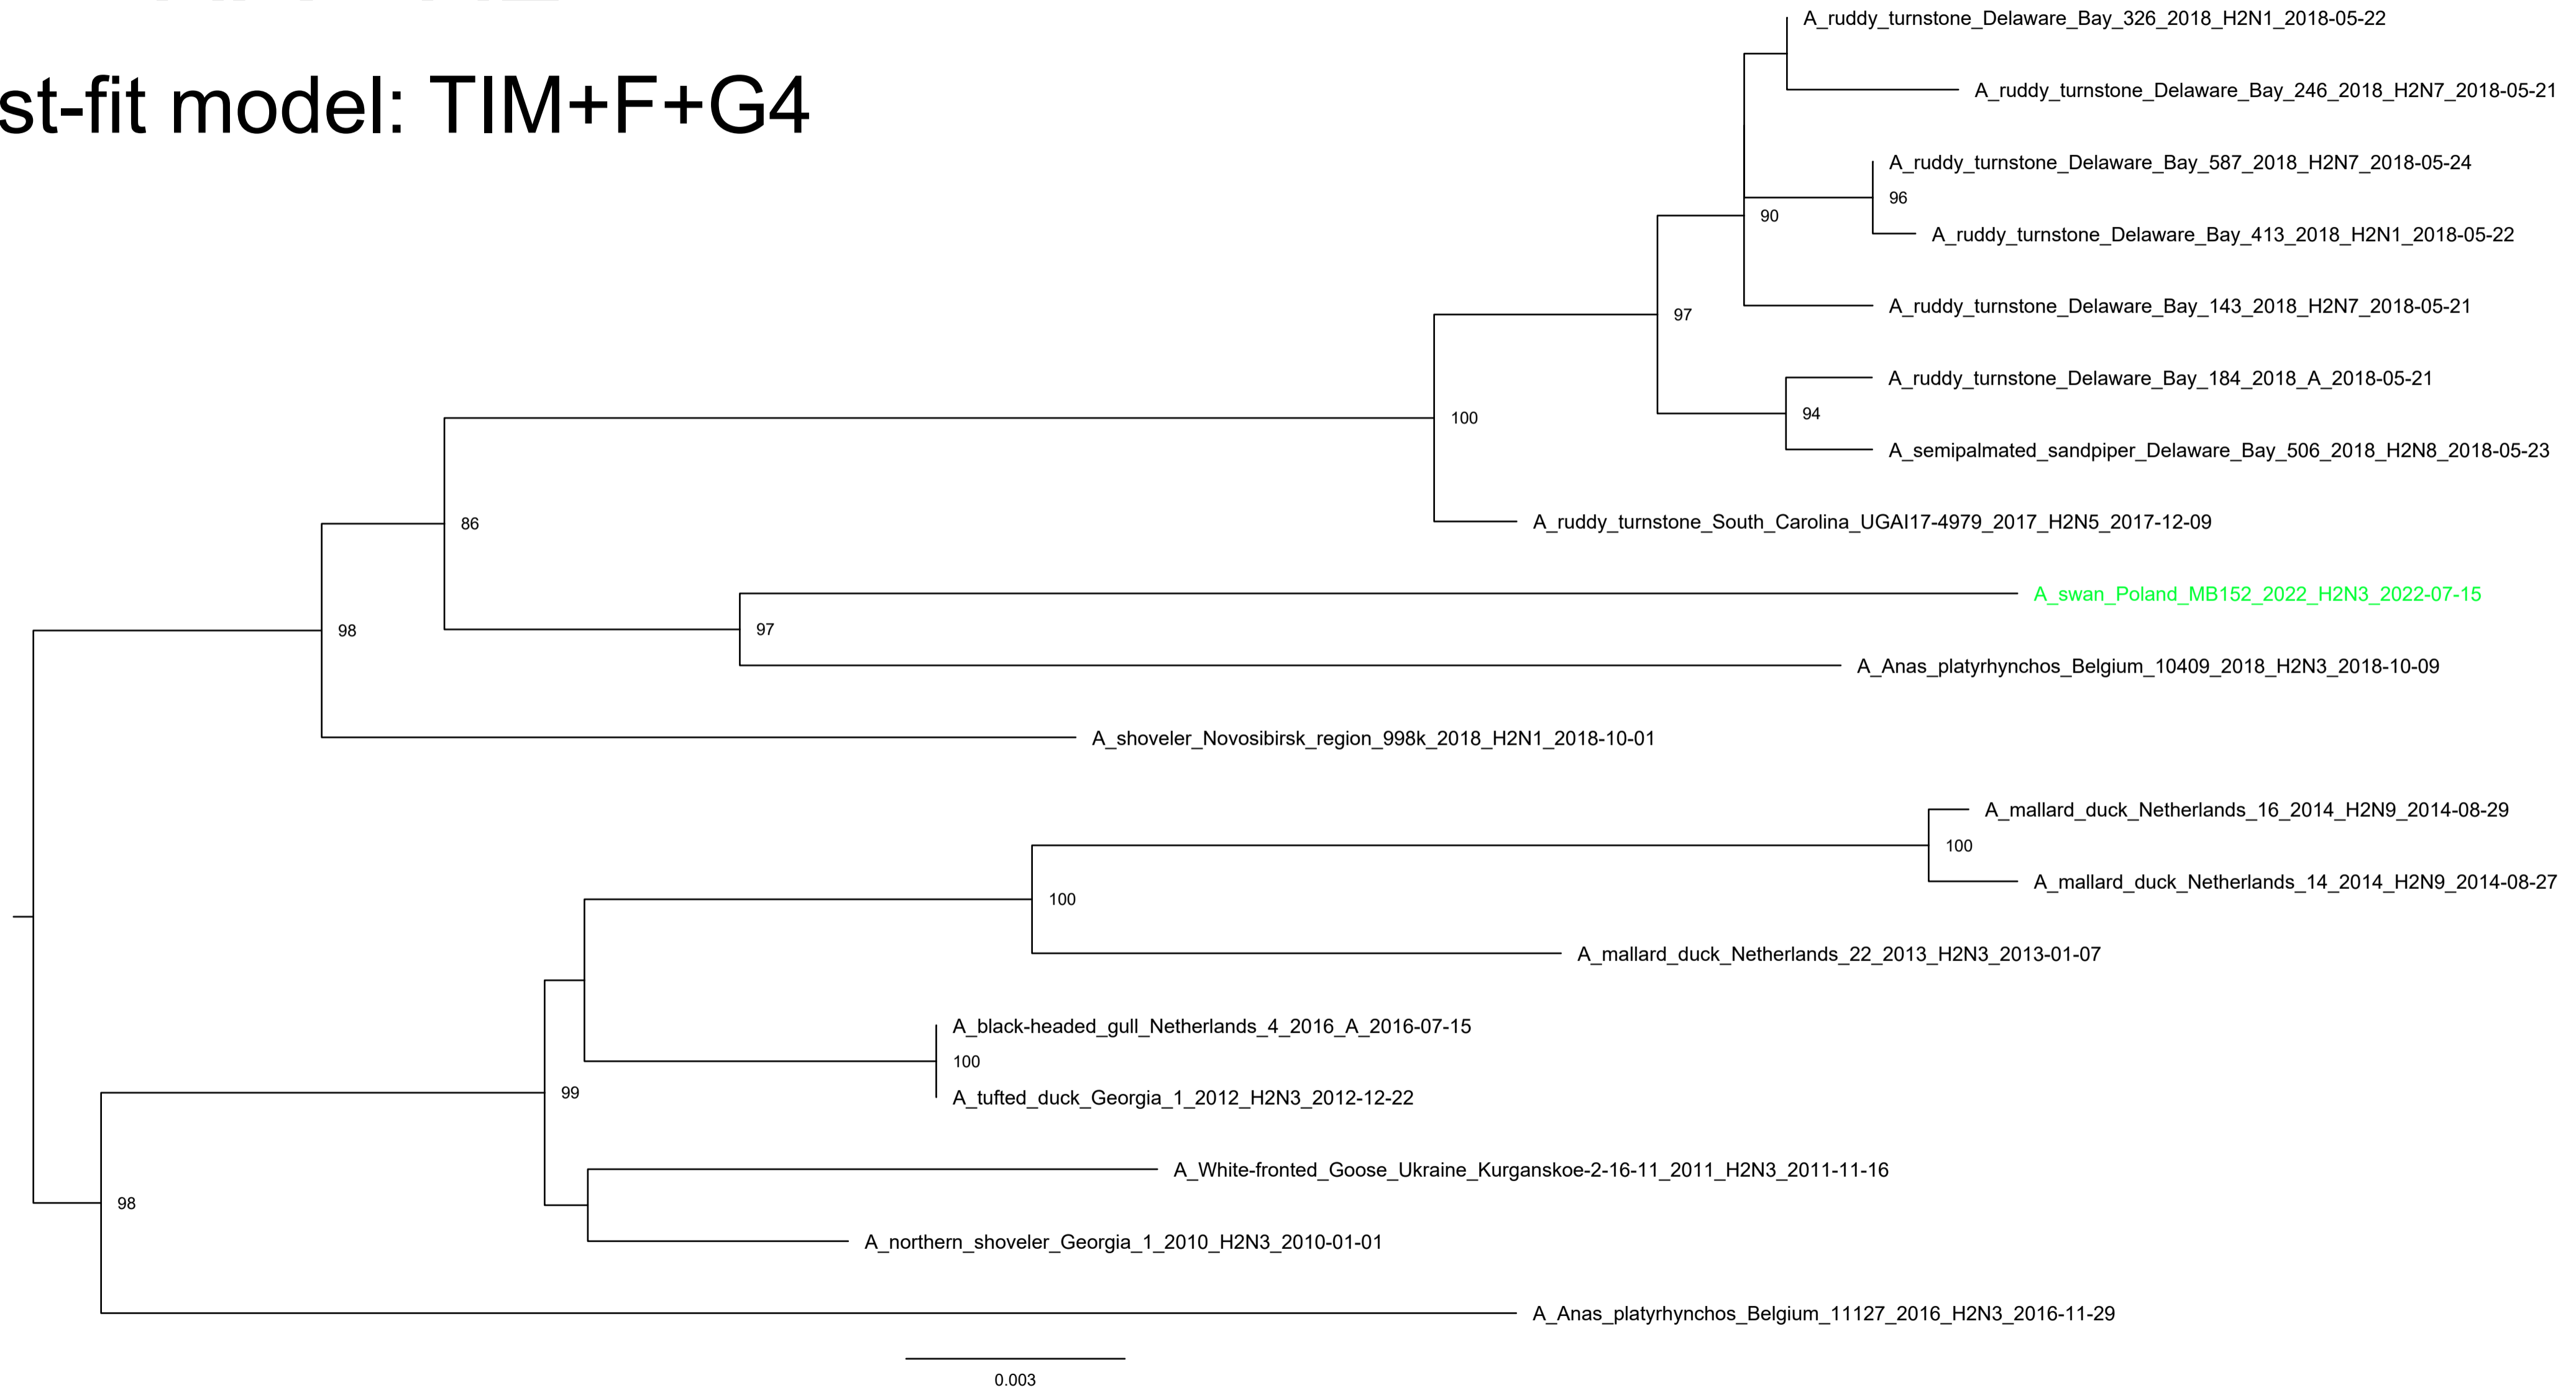

# HA - H3

Best-fit model: TIM+F+G4

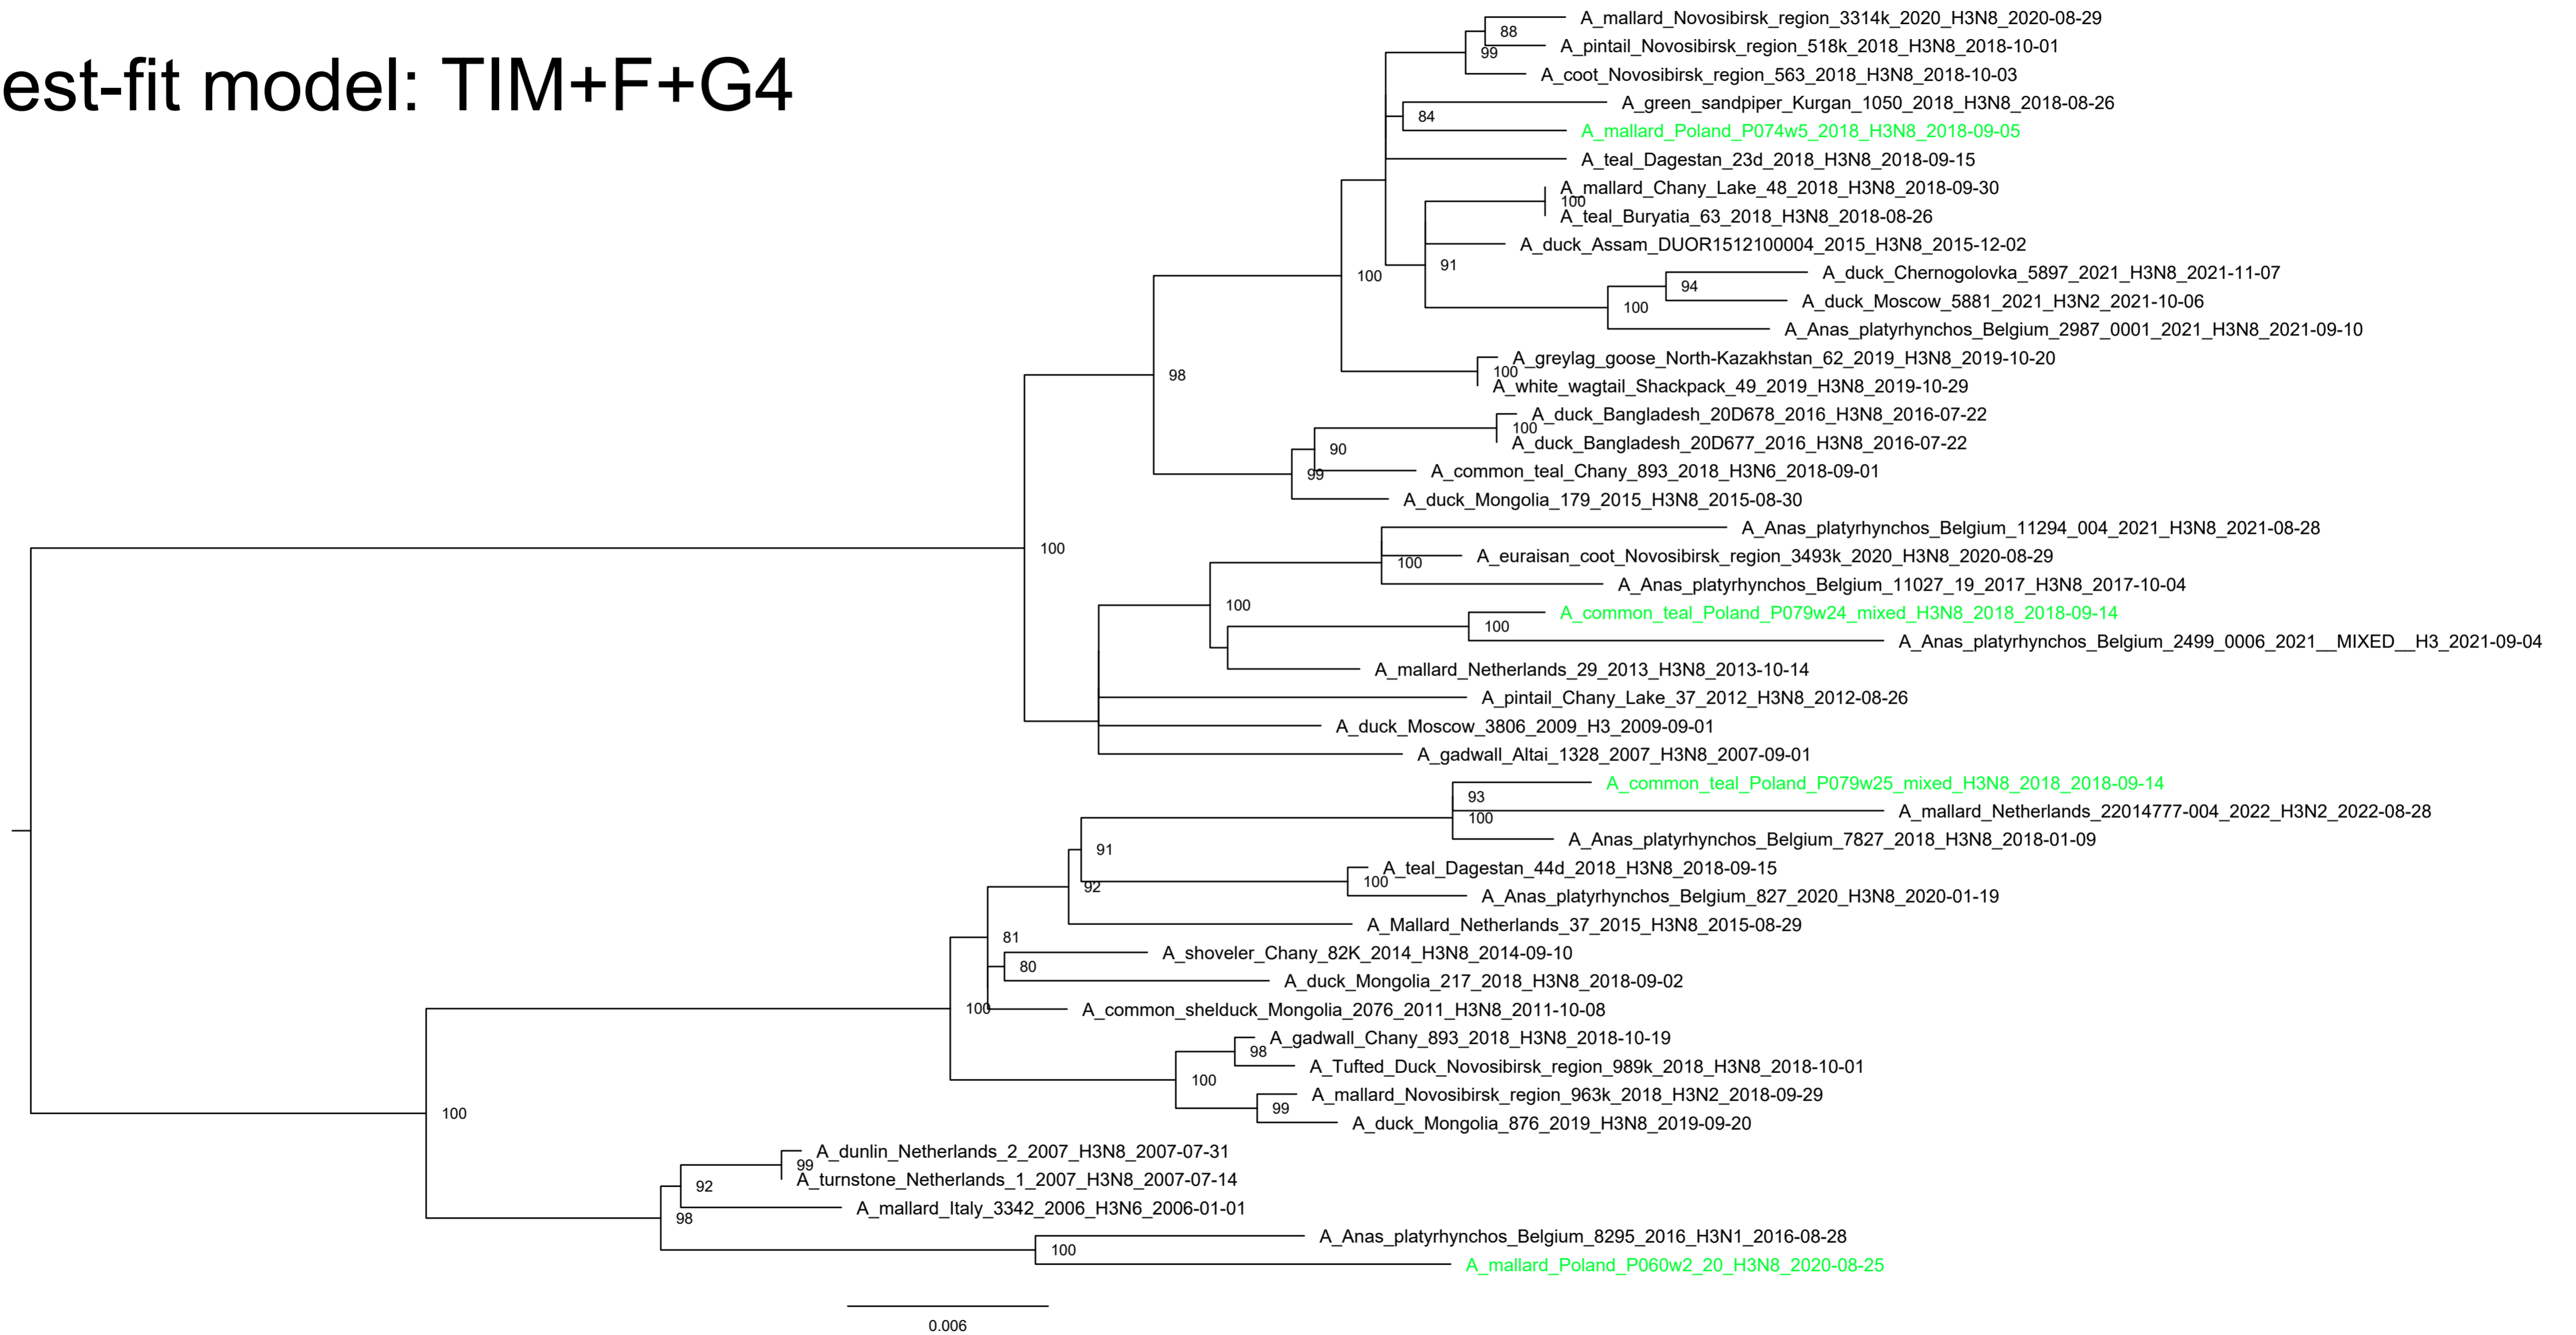



# HA - H9

Best-fit model: TIM+F+G4

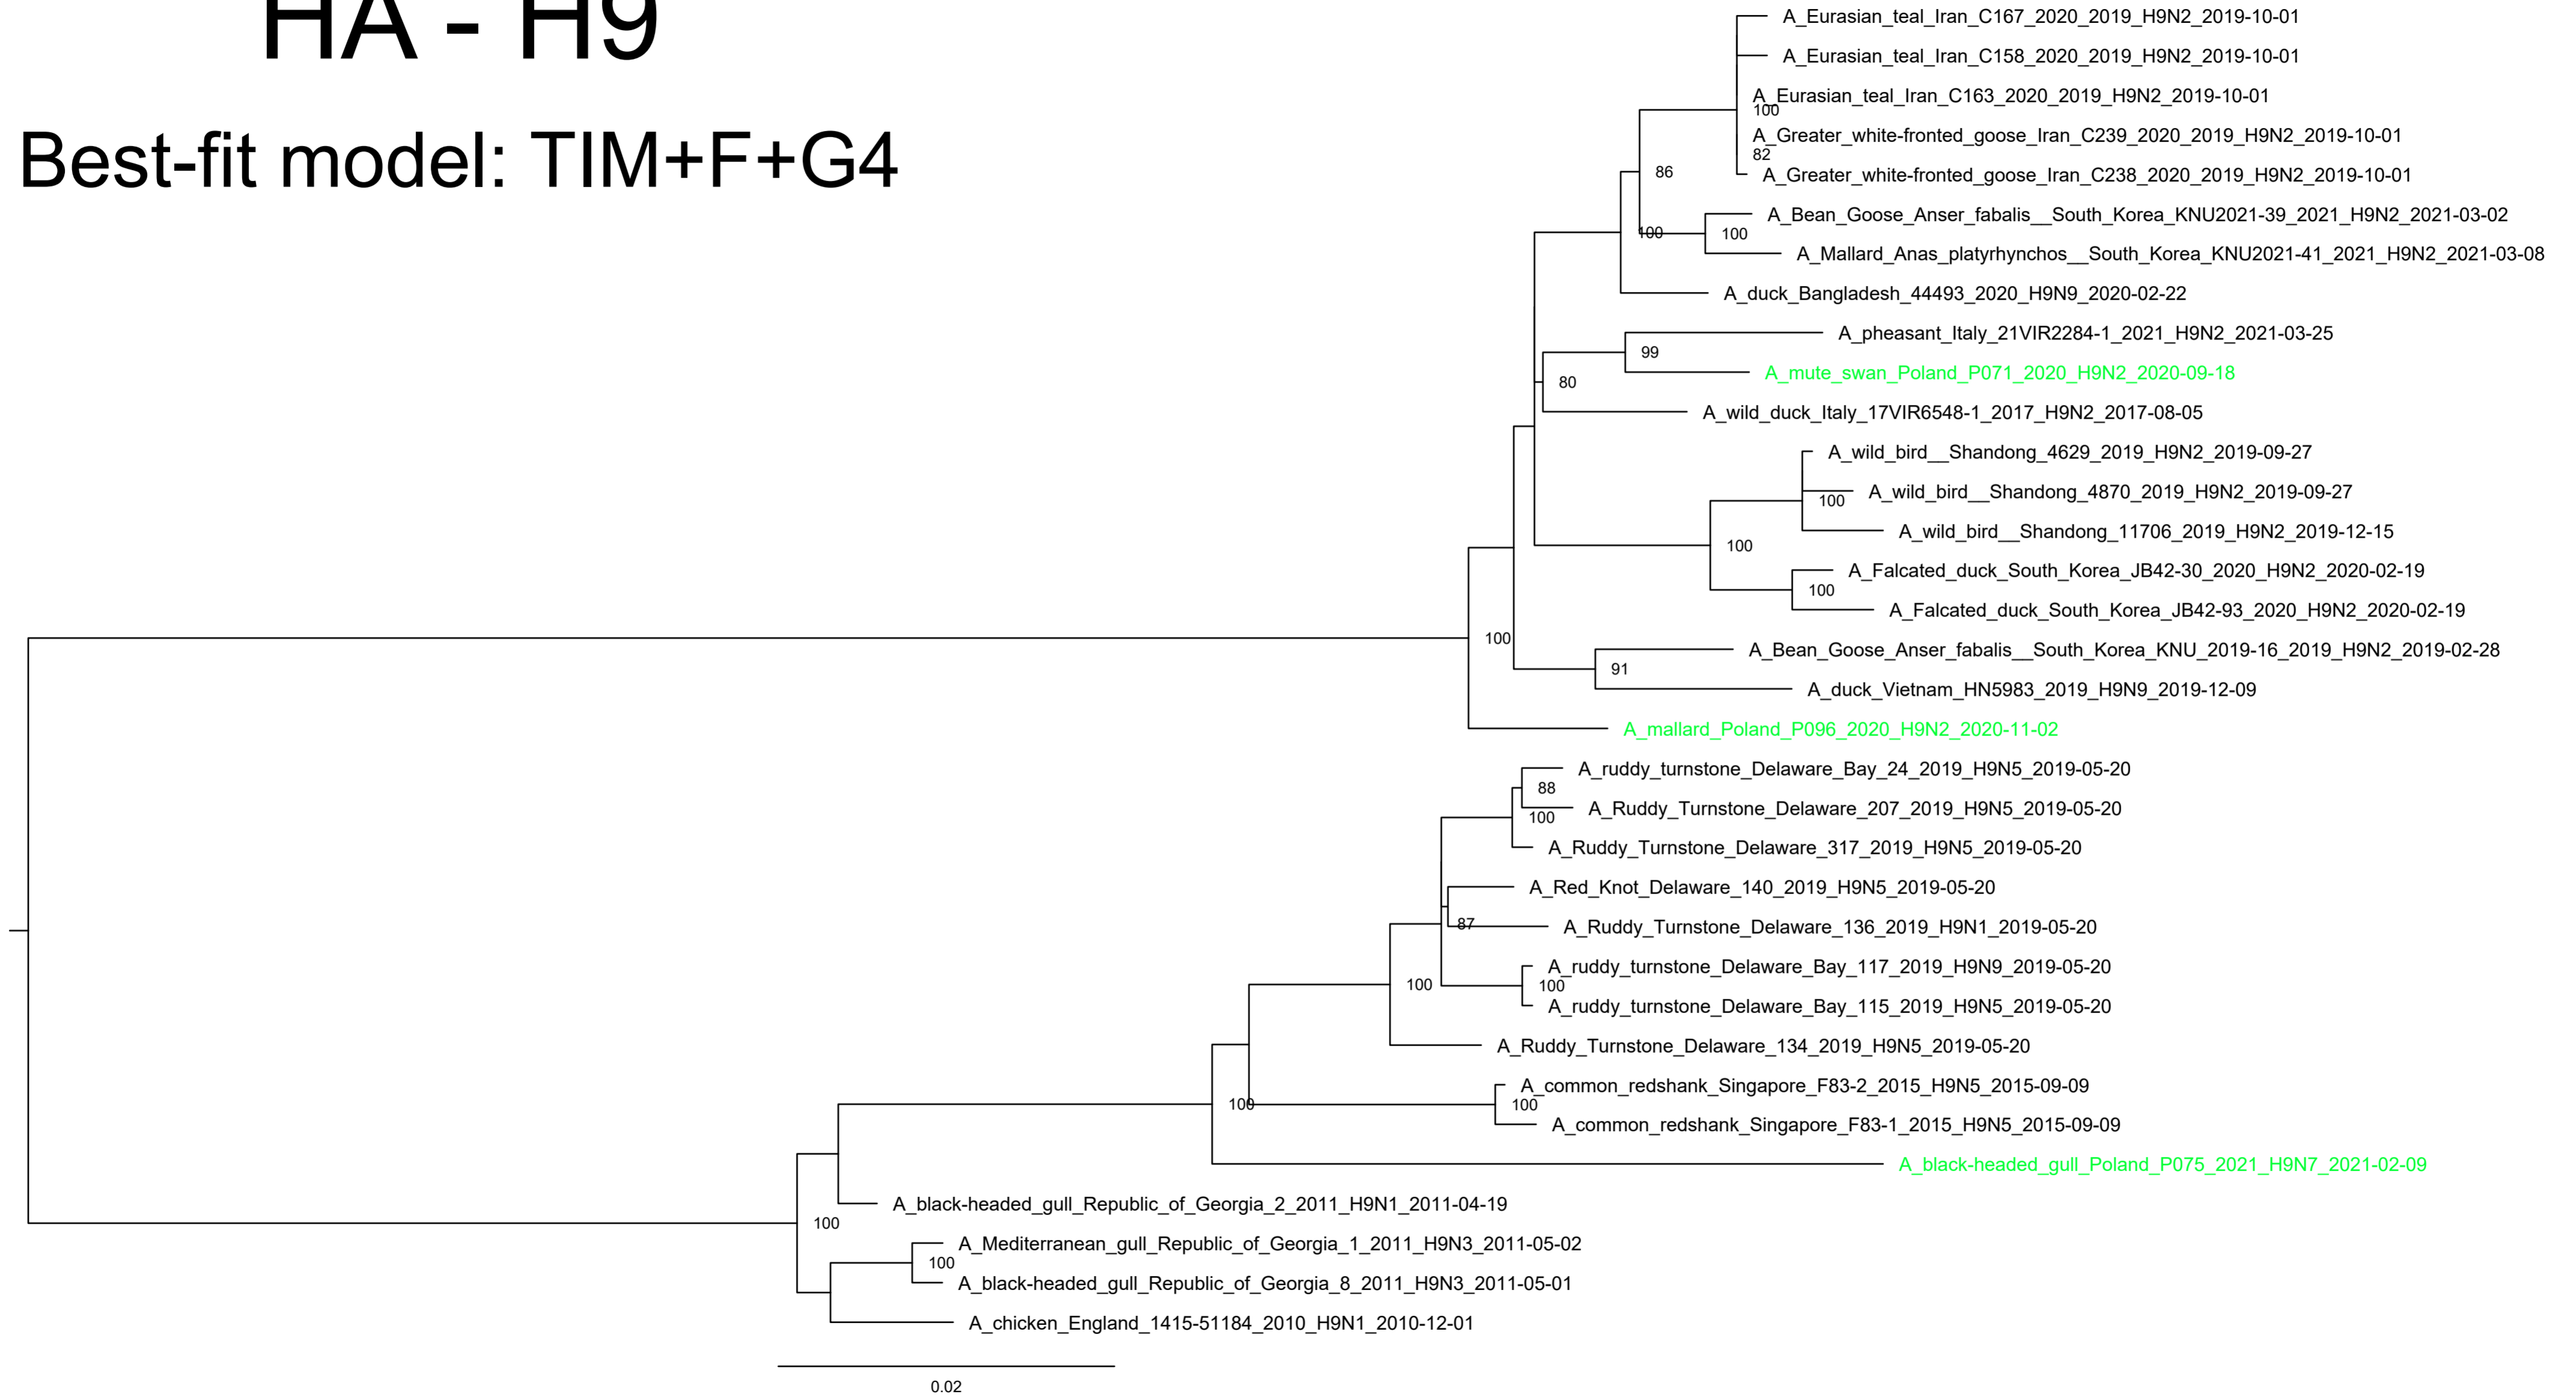



# HA - H12

Best-fit model: TPM3u+F+G4

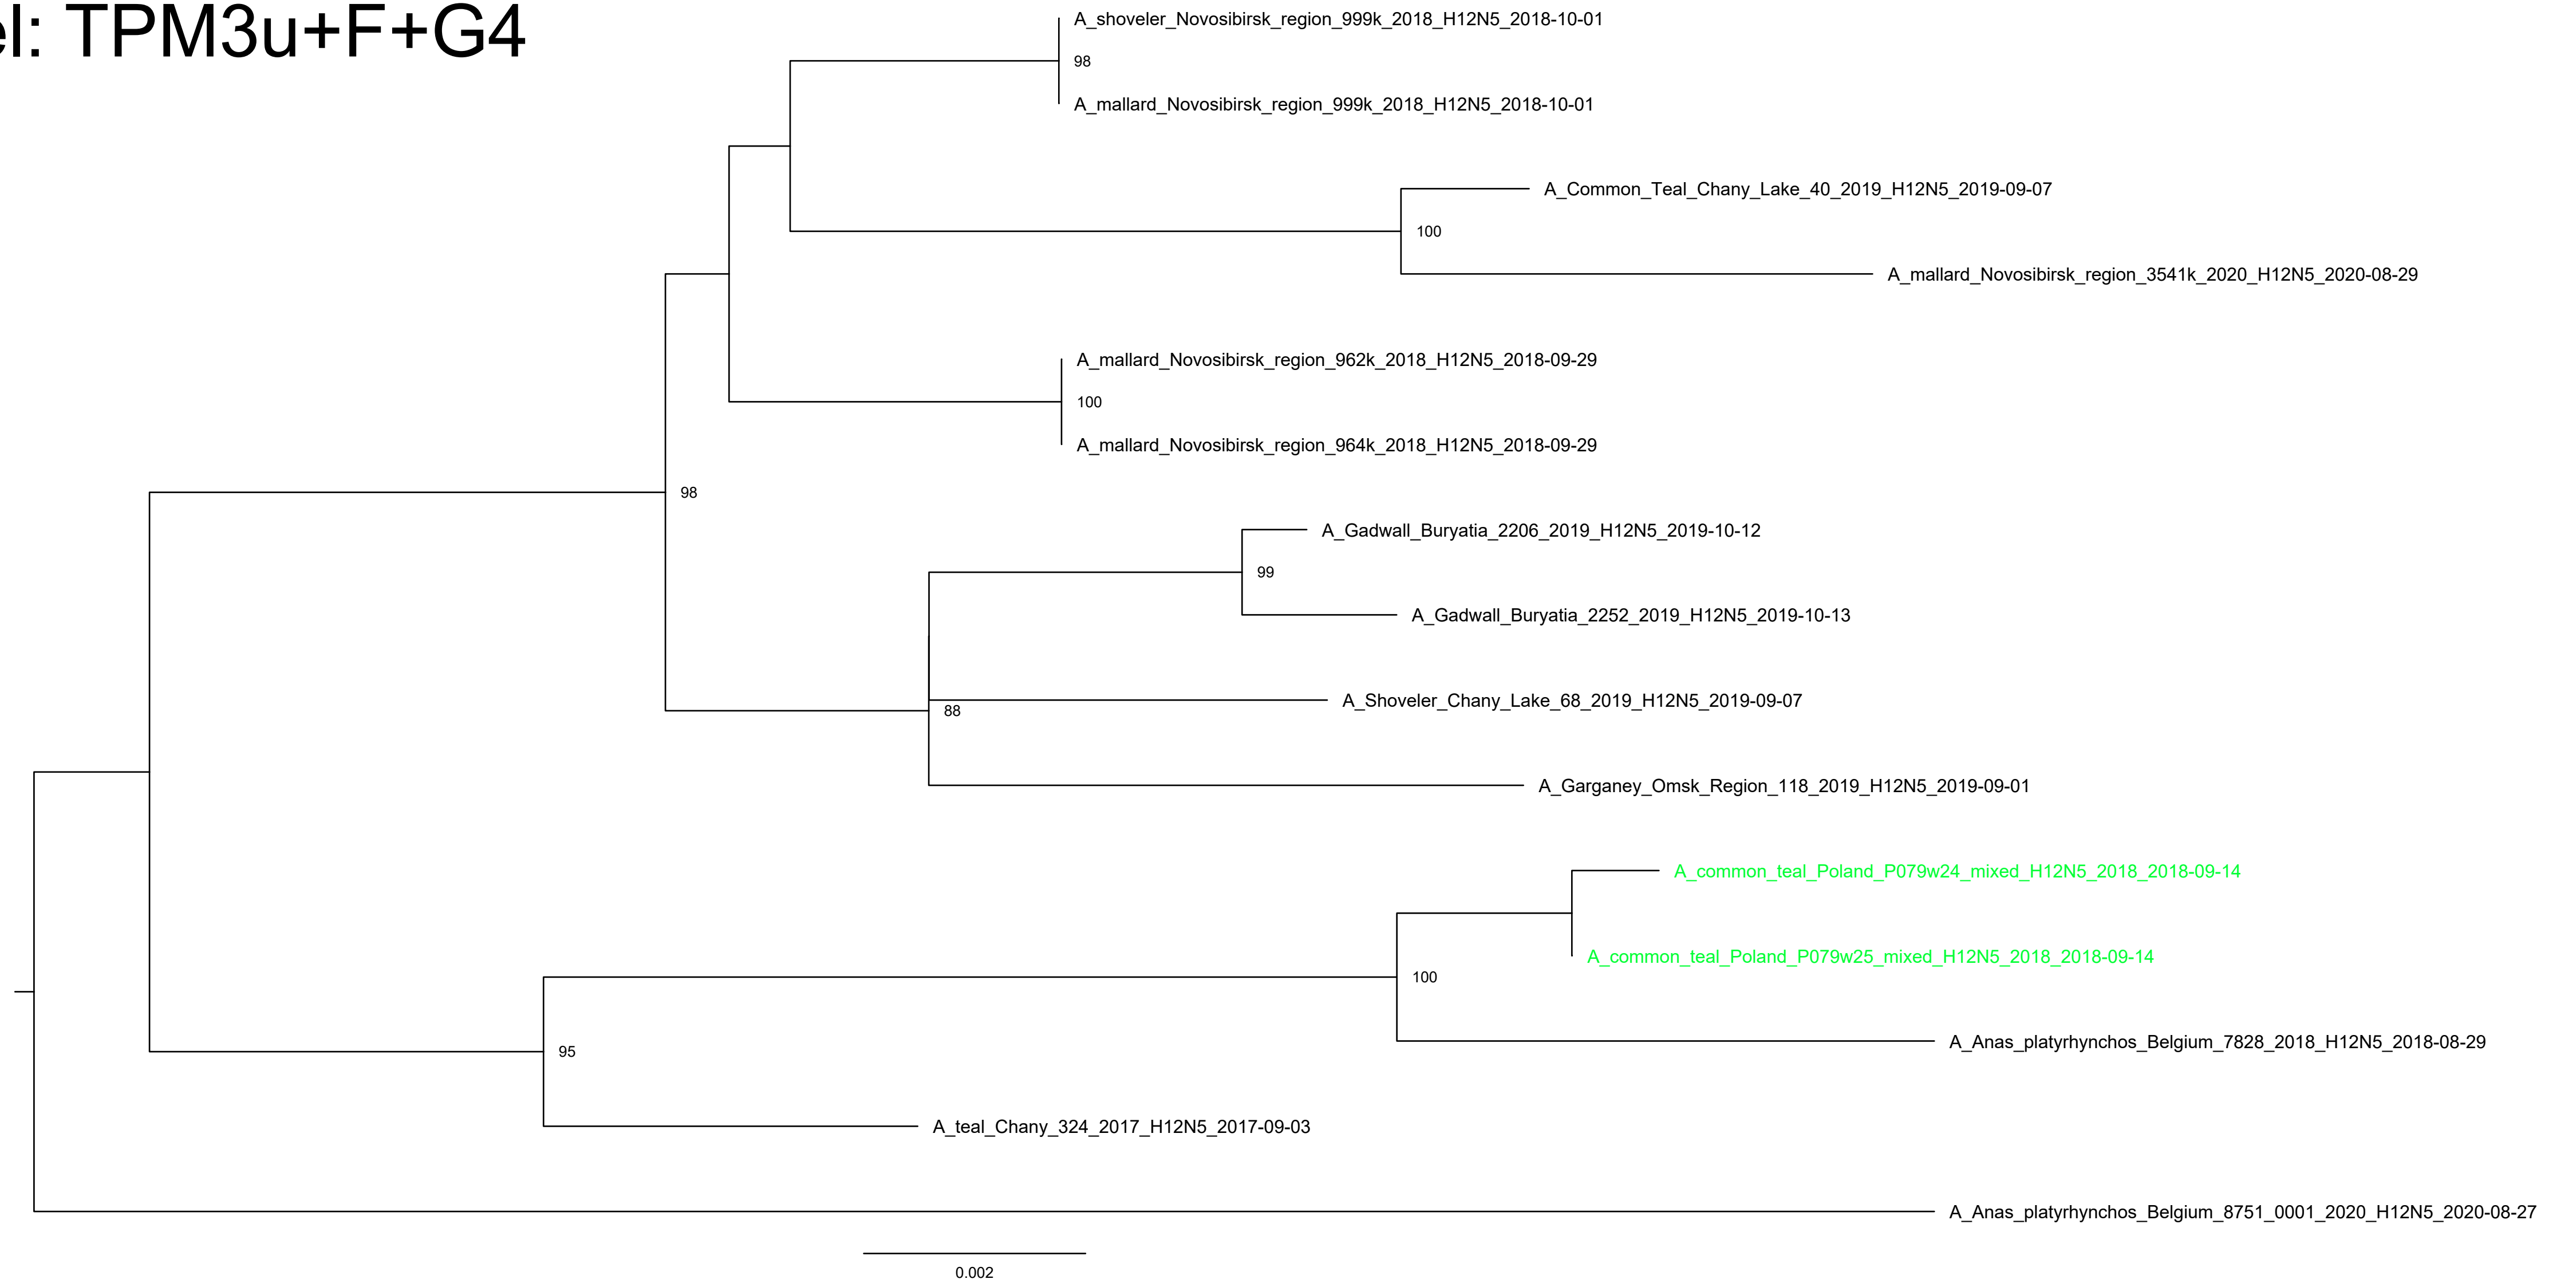

# HA - H16

Best-fit model: TPM2u+F+G4

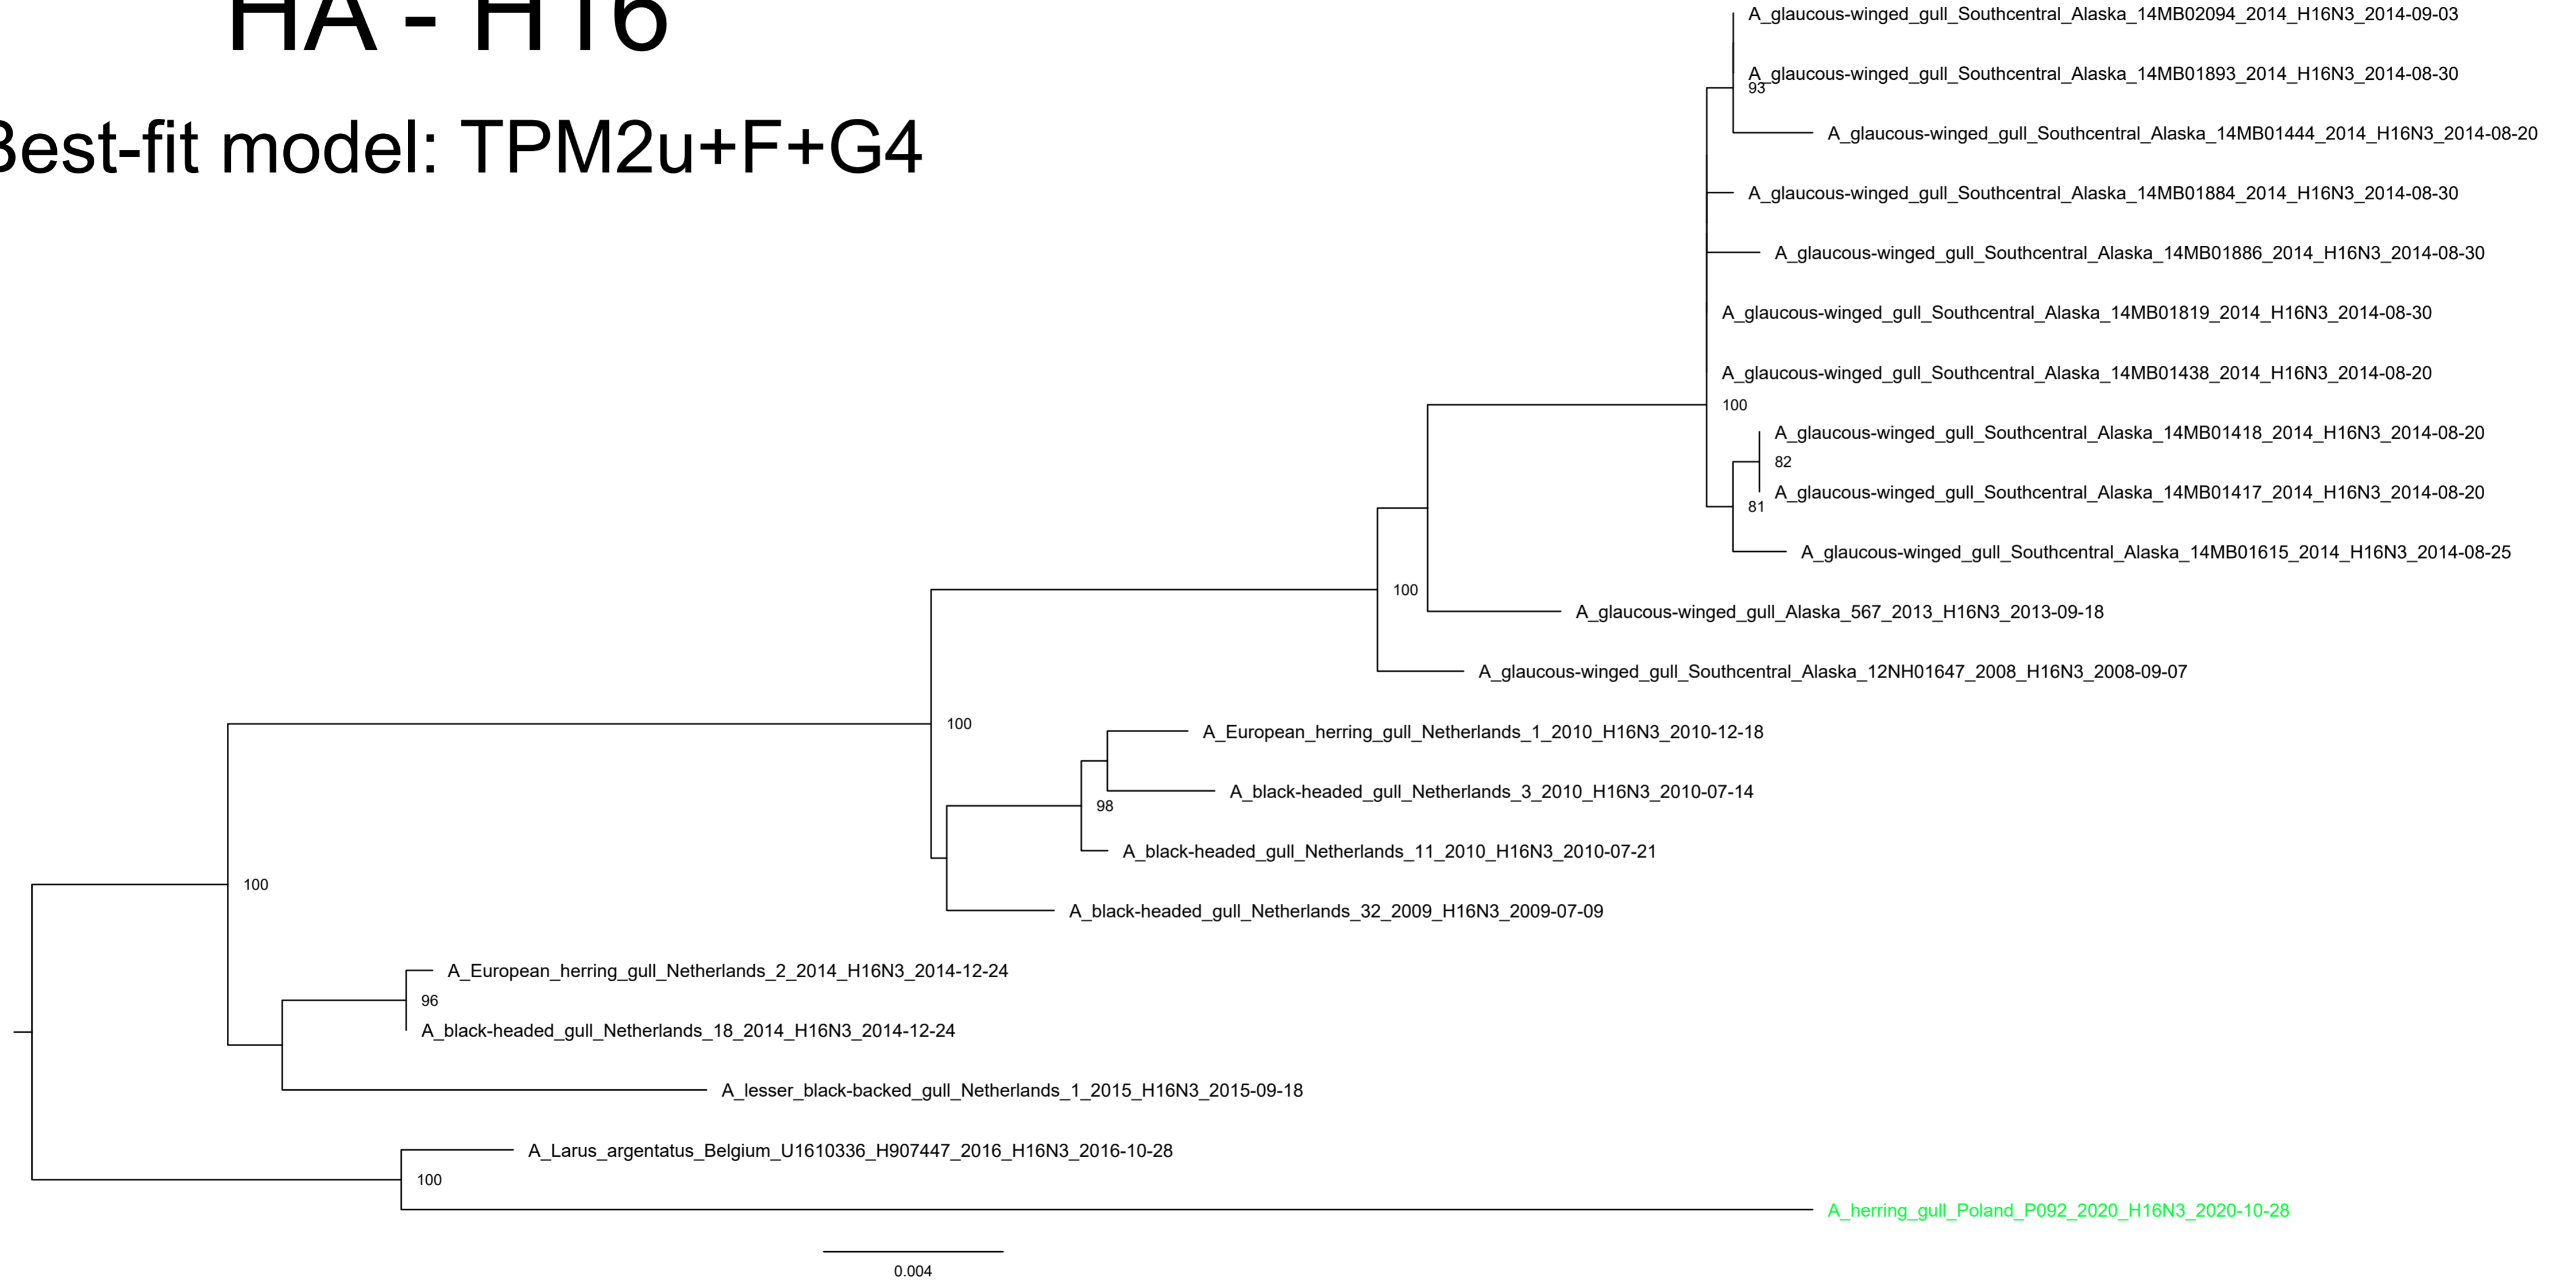

# NP

Best-fit model: TVM+F+I+G4

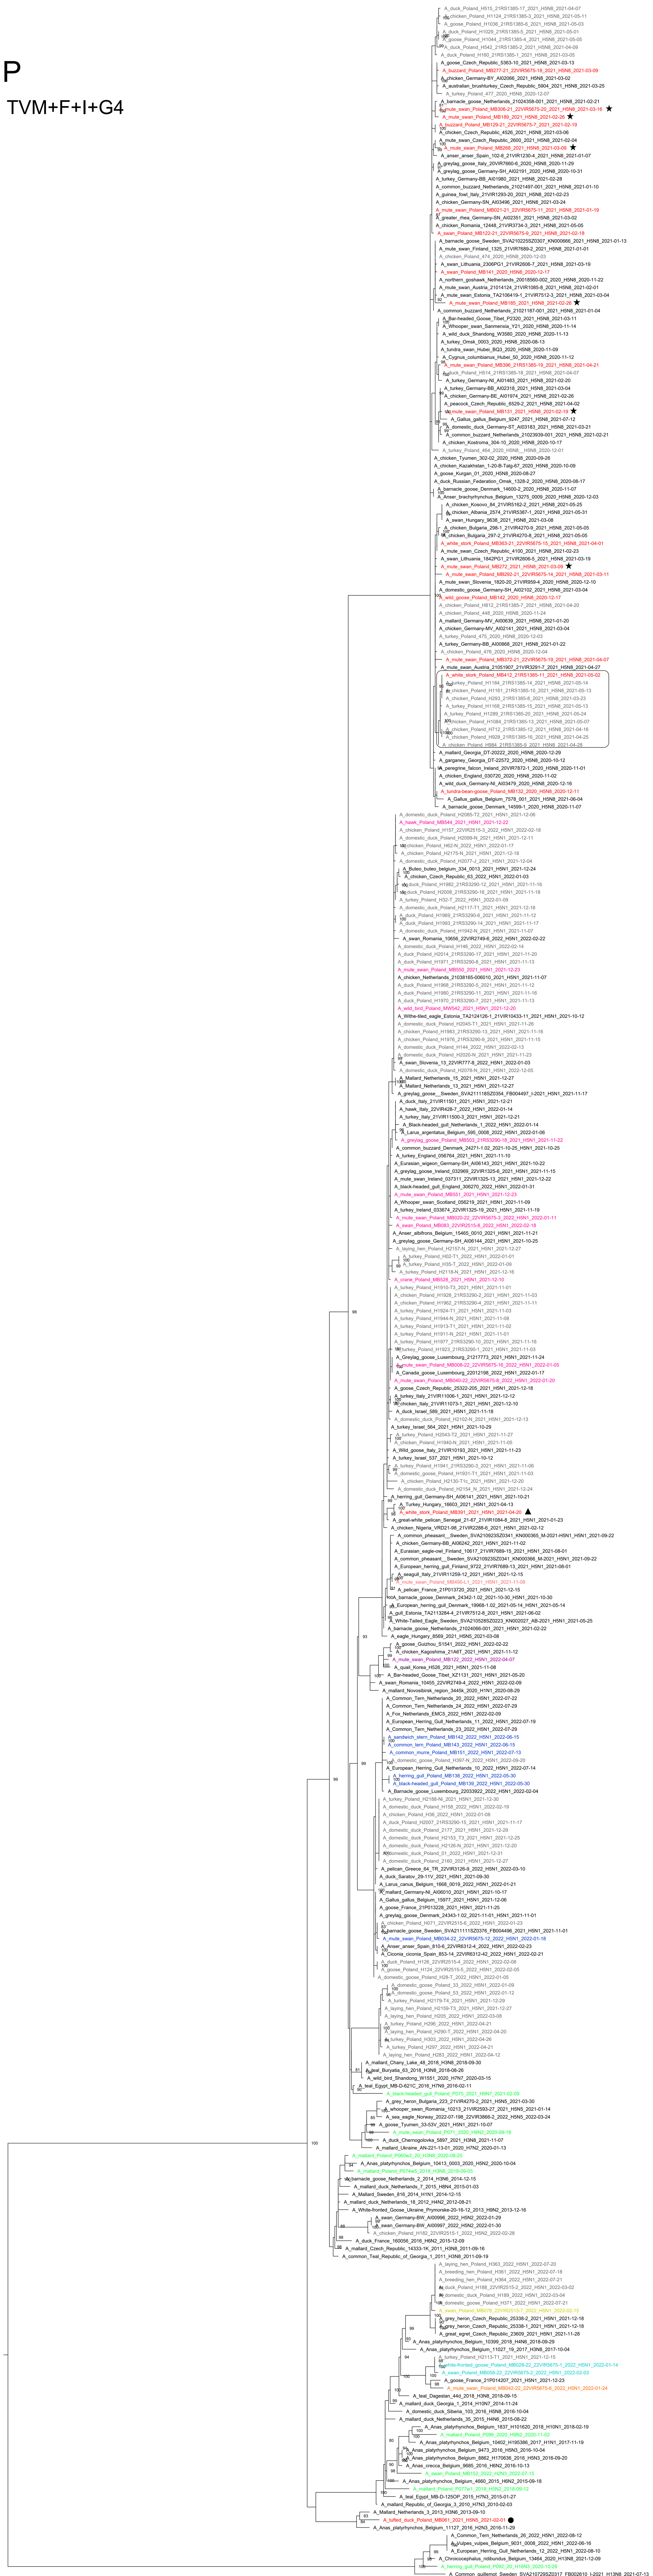



# NA - N2

Best-fit model: HKY+F+I

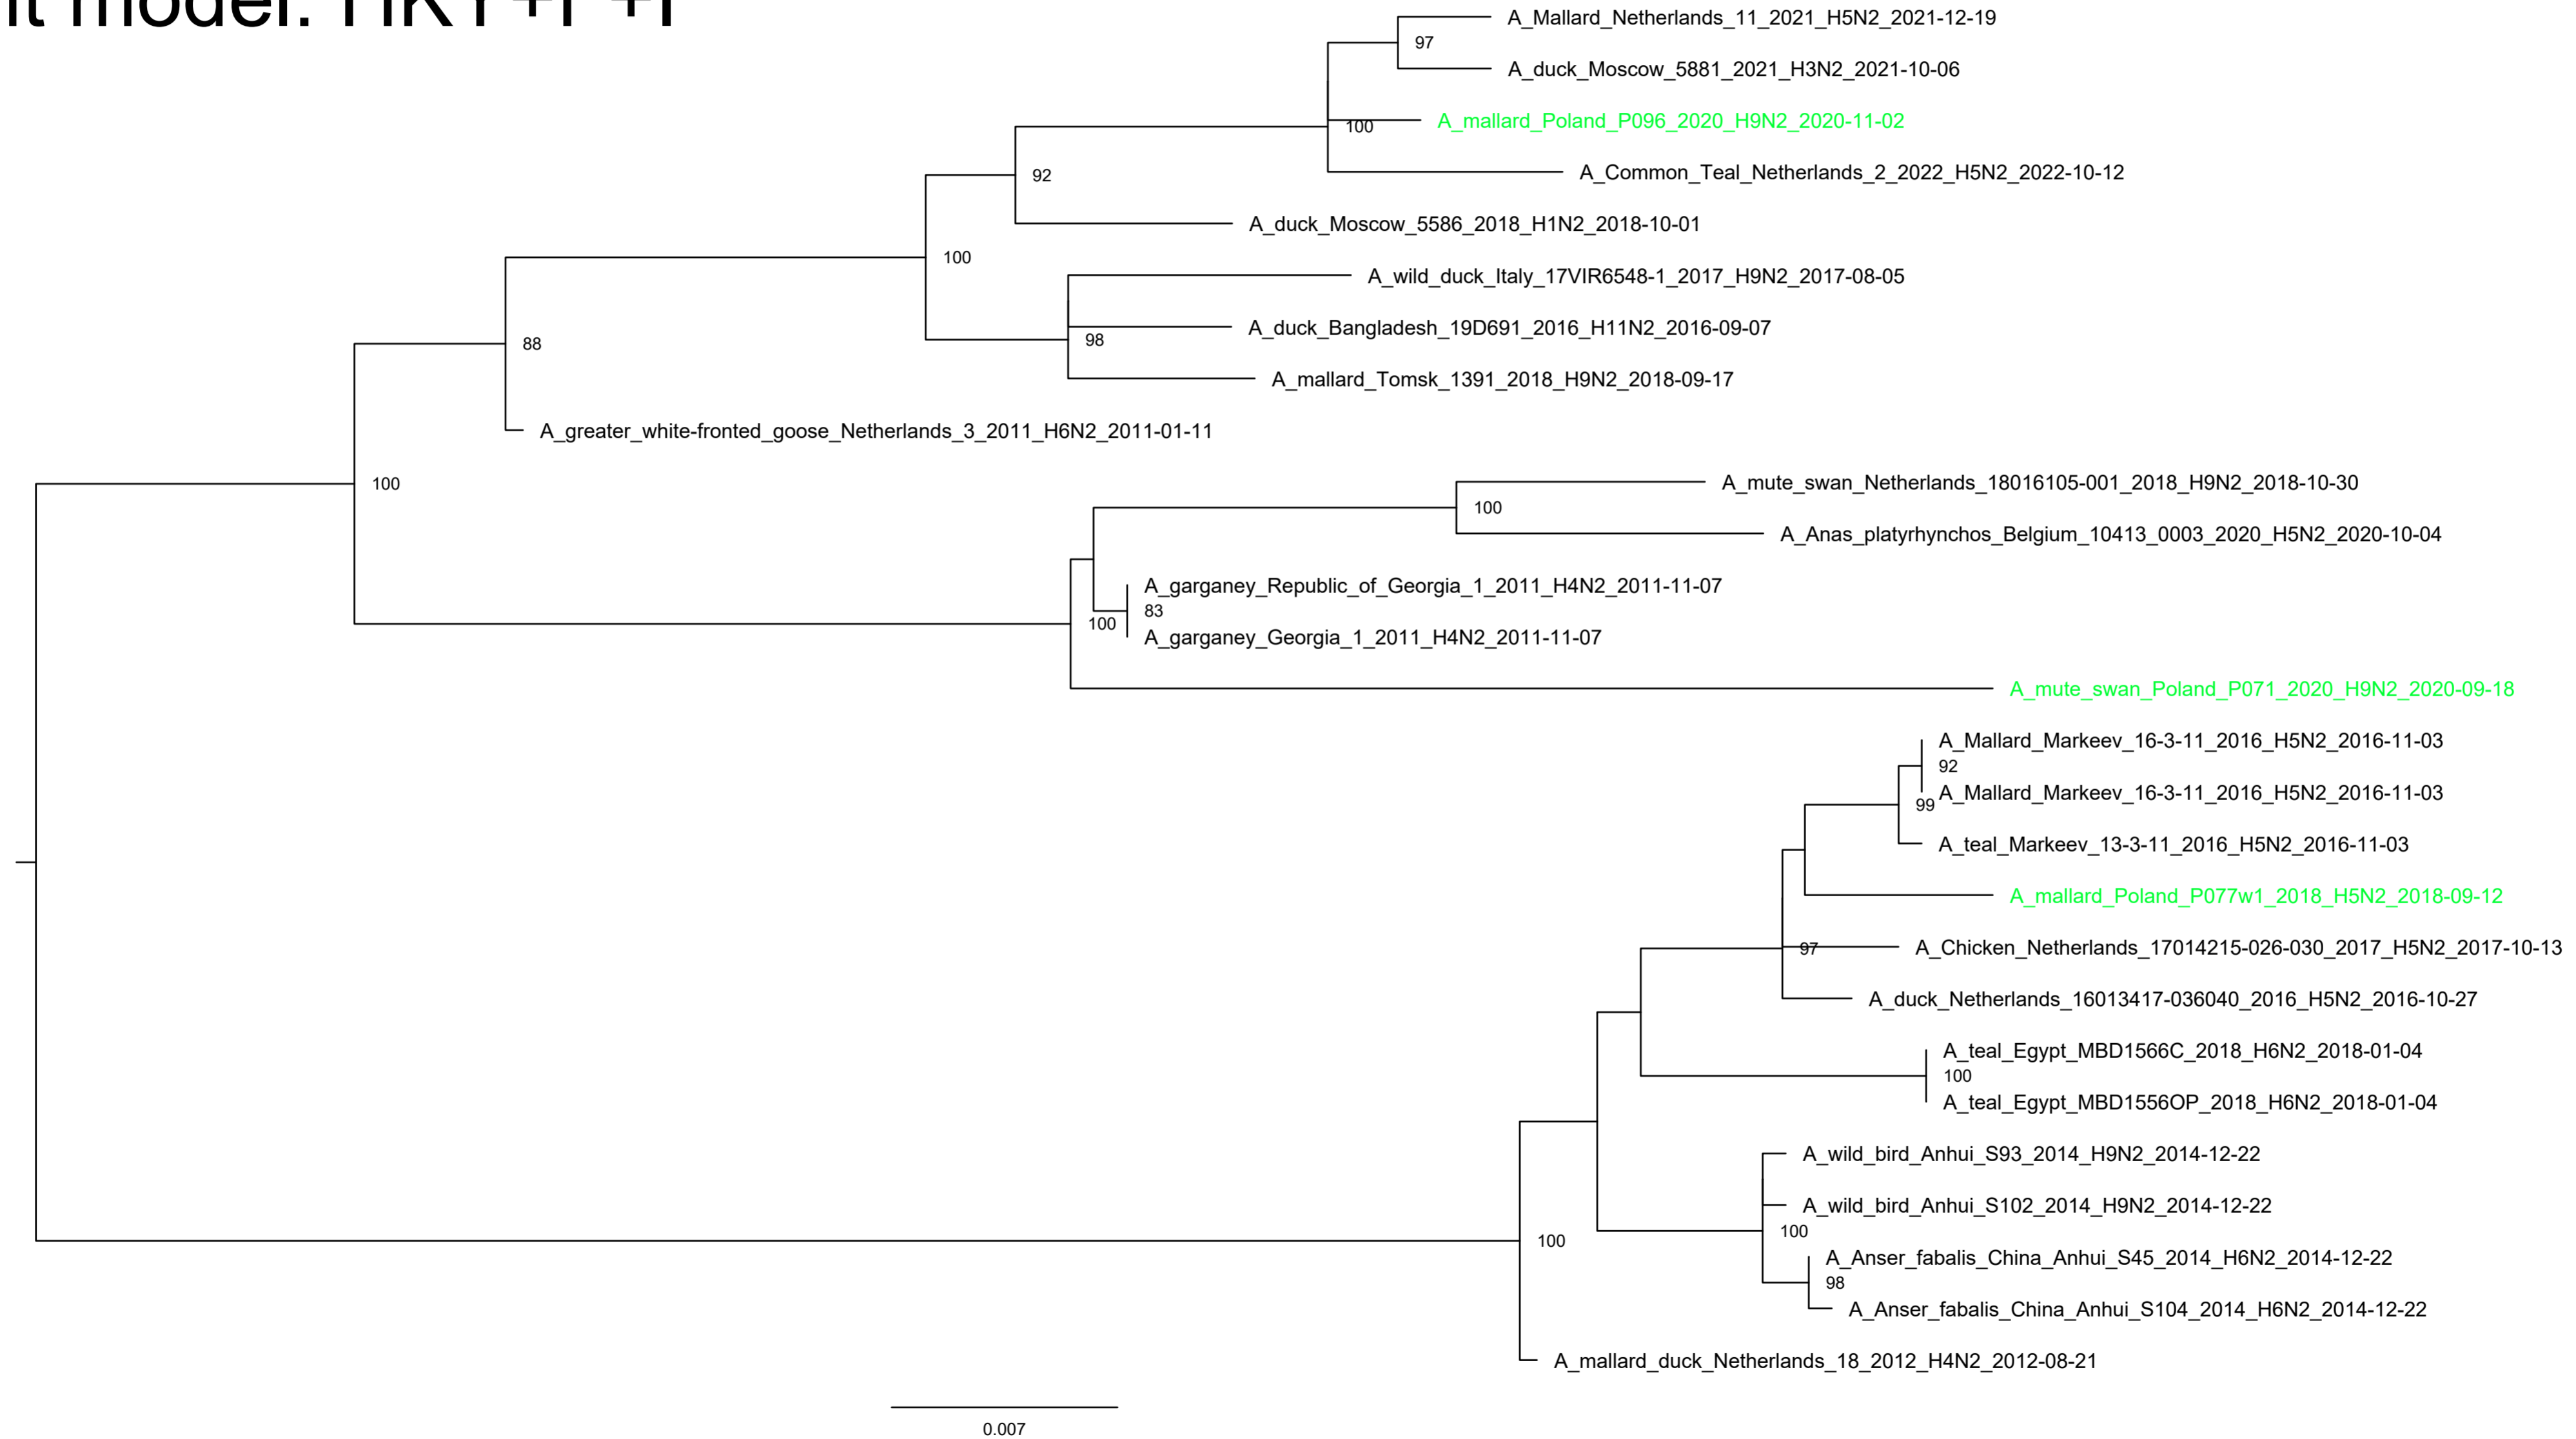

# NA - N3

Best-fit model: HKY+F+I

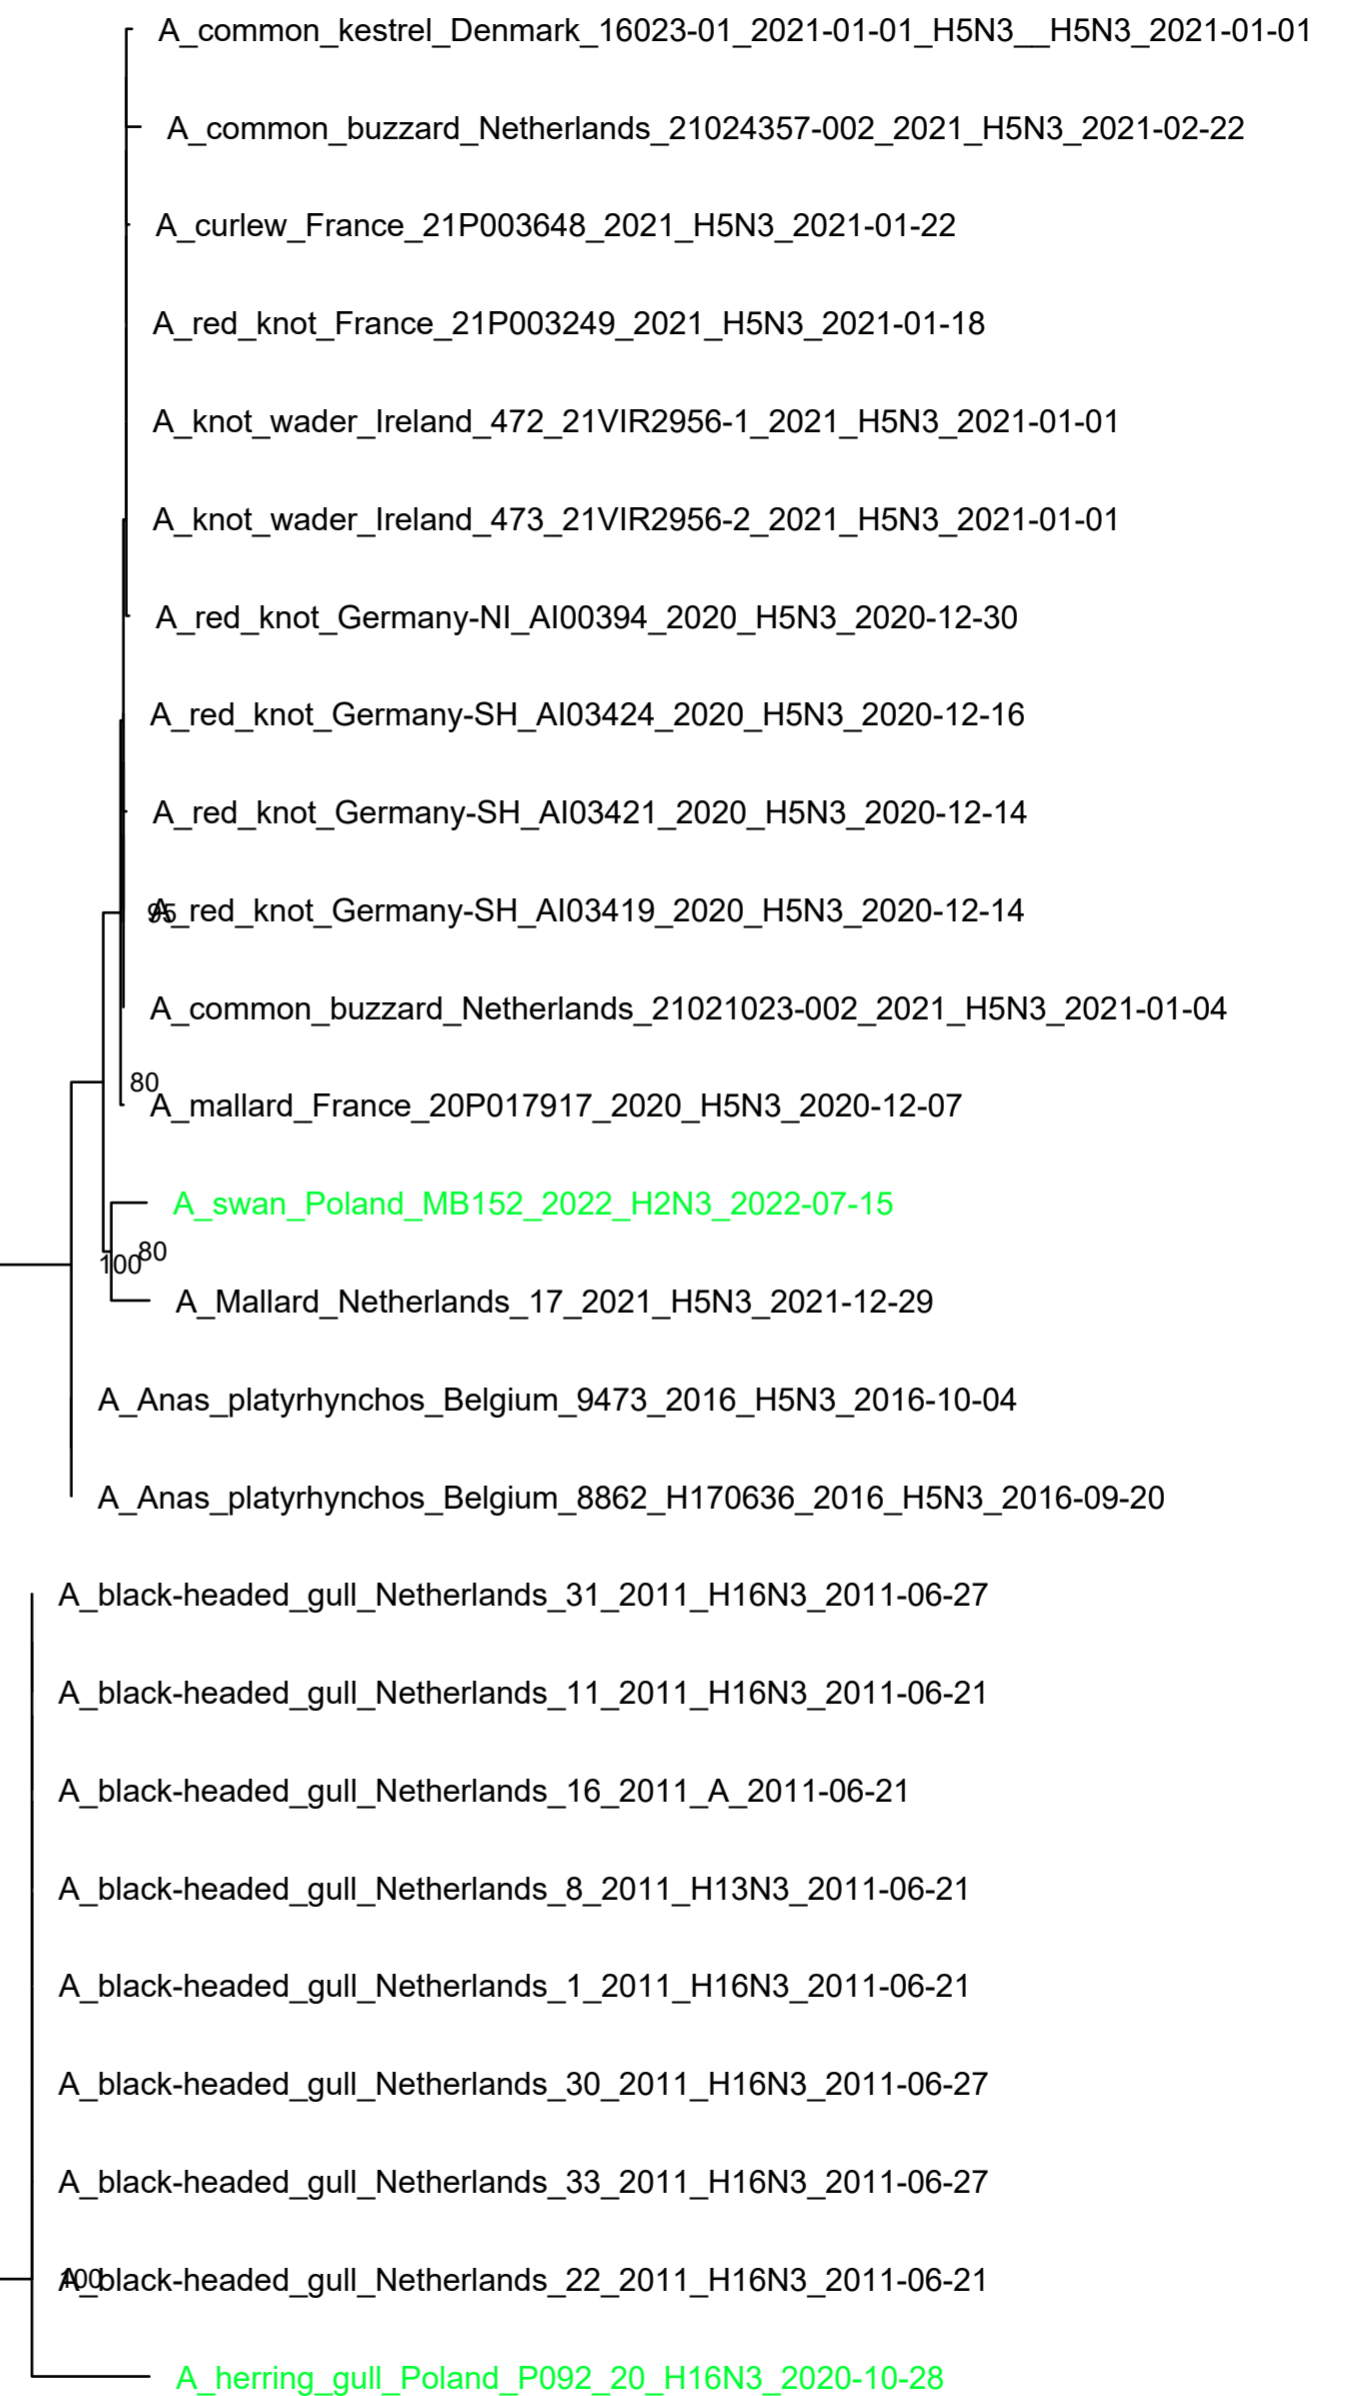

0.08

# NA - N5

Best-fit model: HKY+F+G4

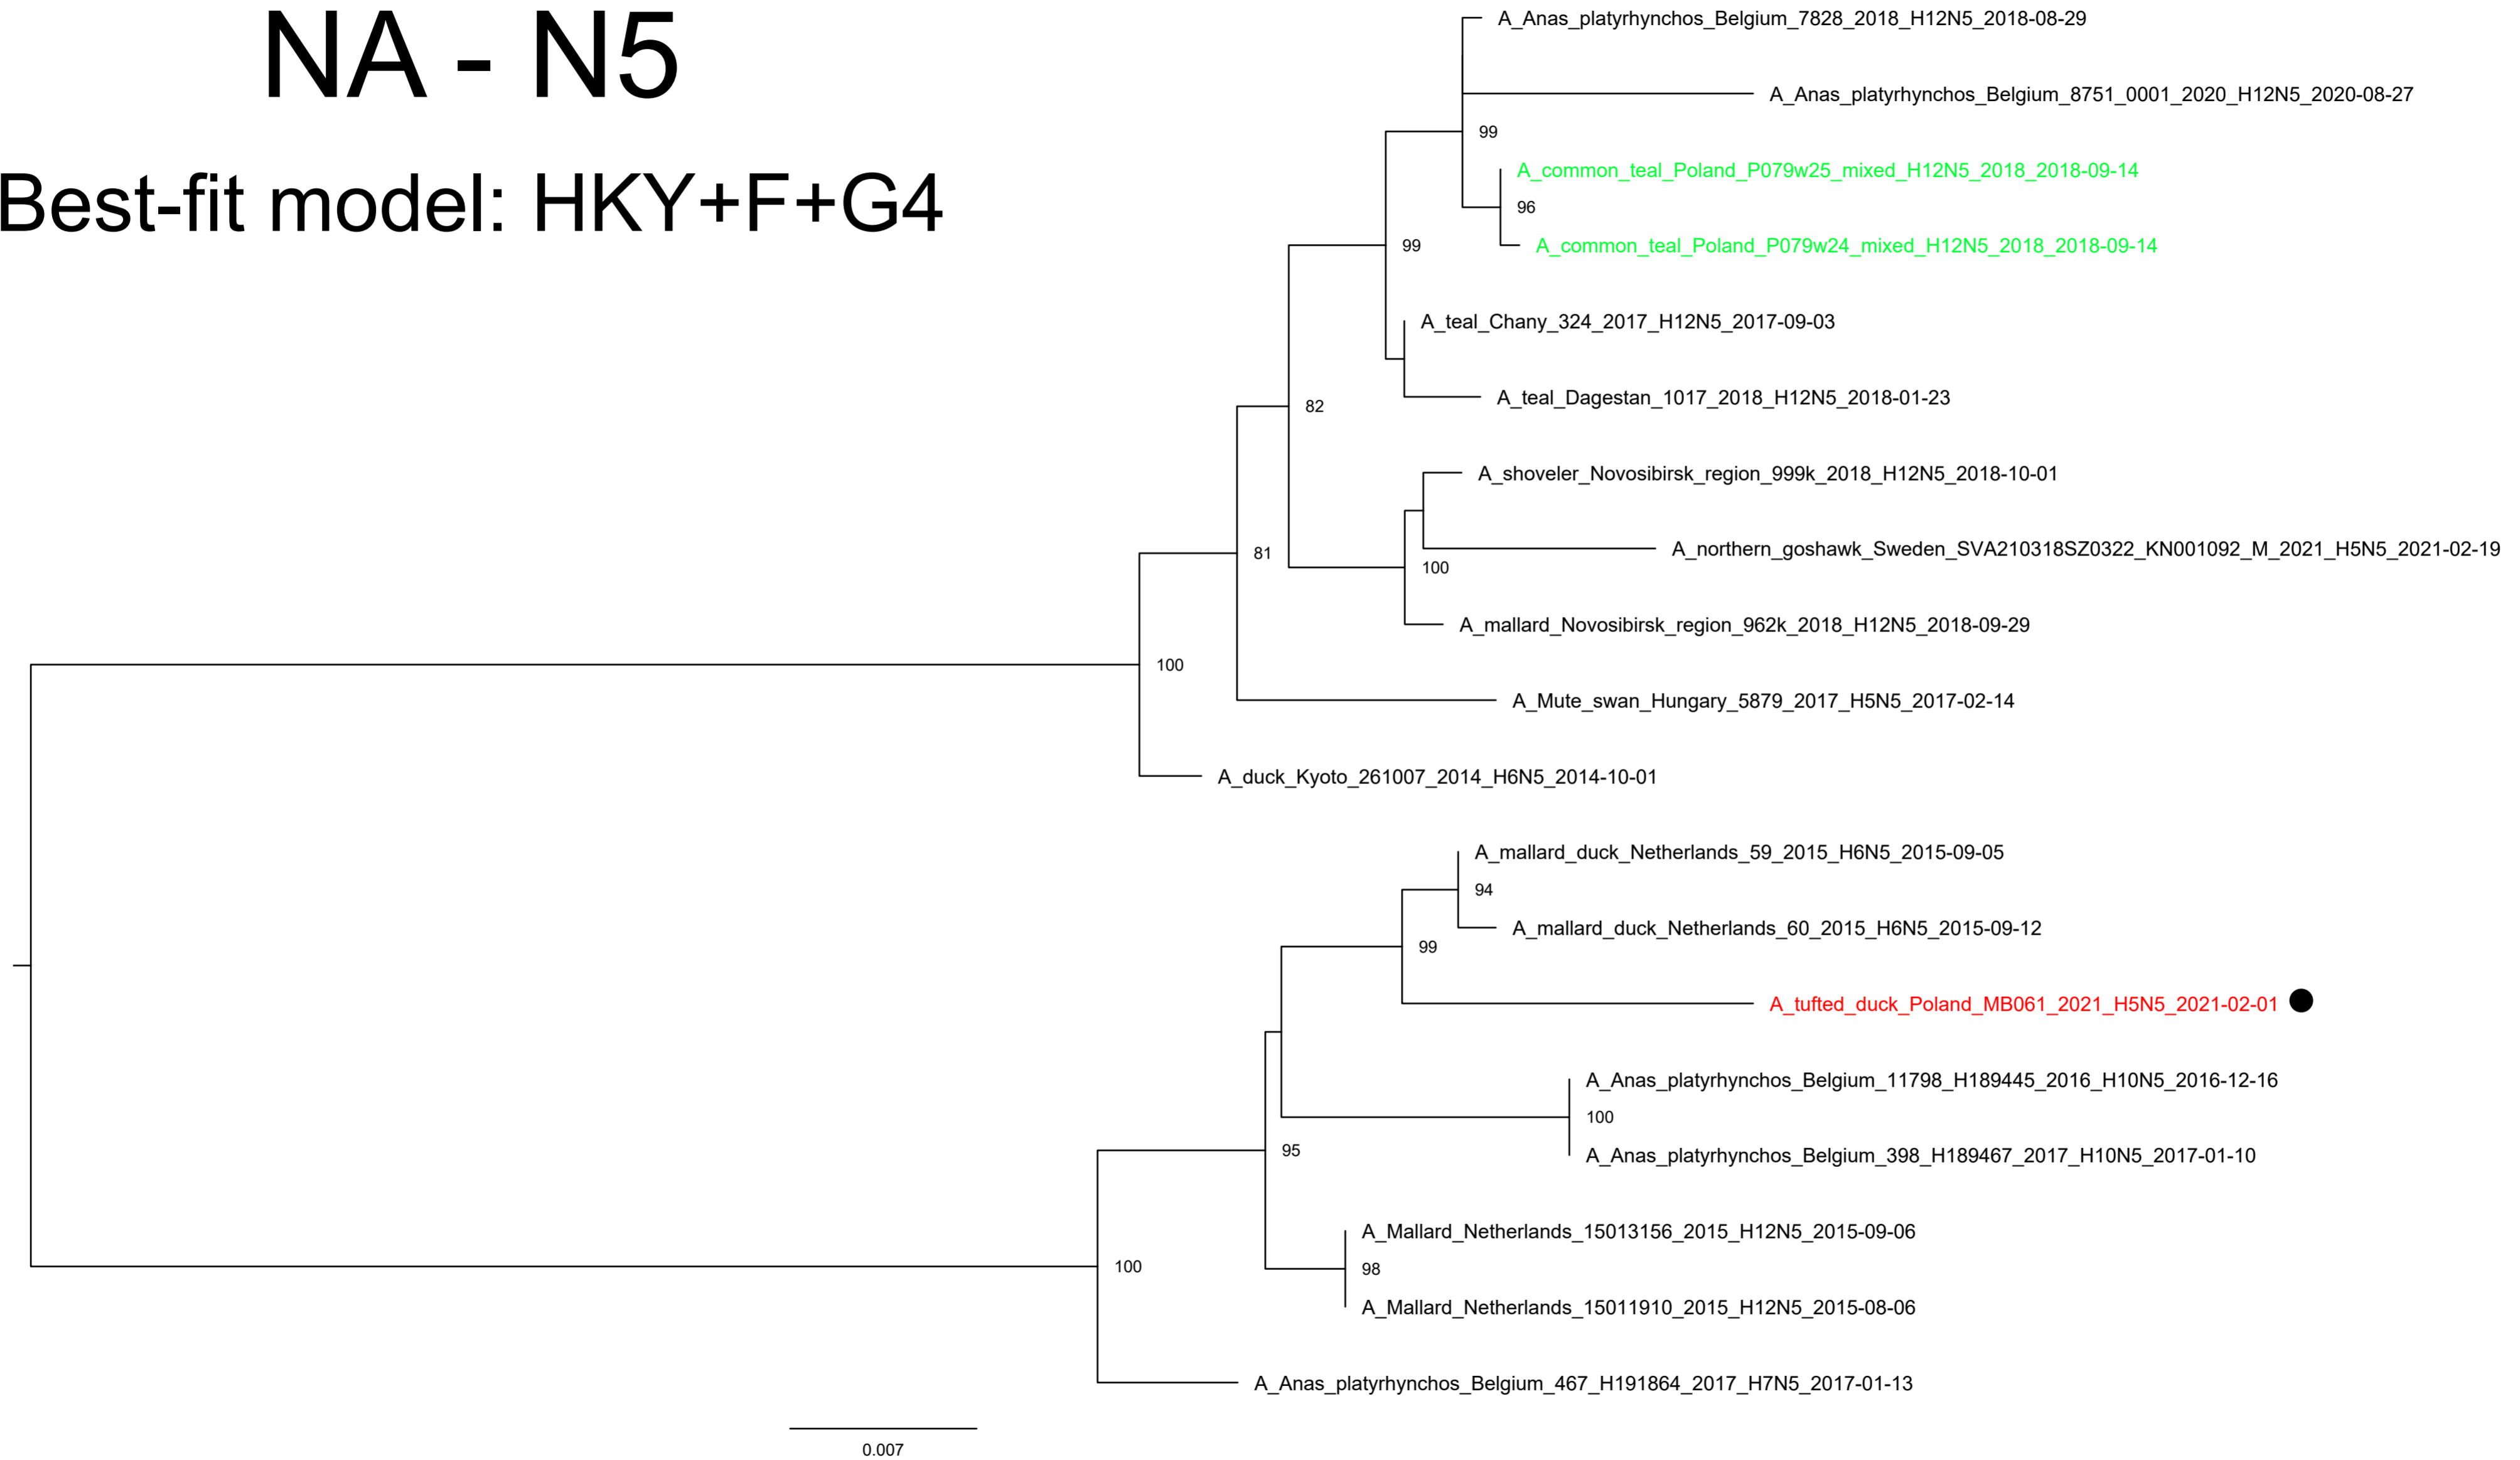

# NA - N7

Best-fit model: TN+F

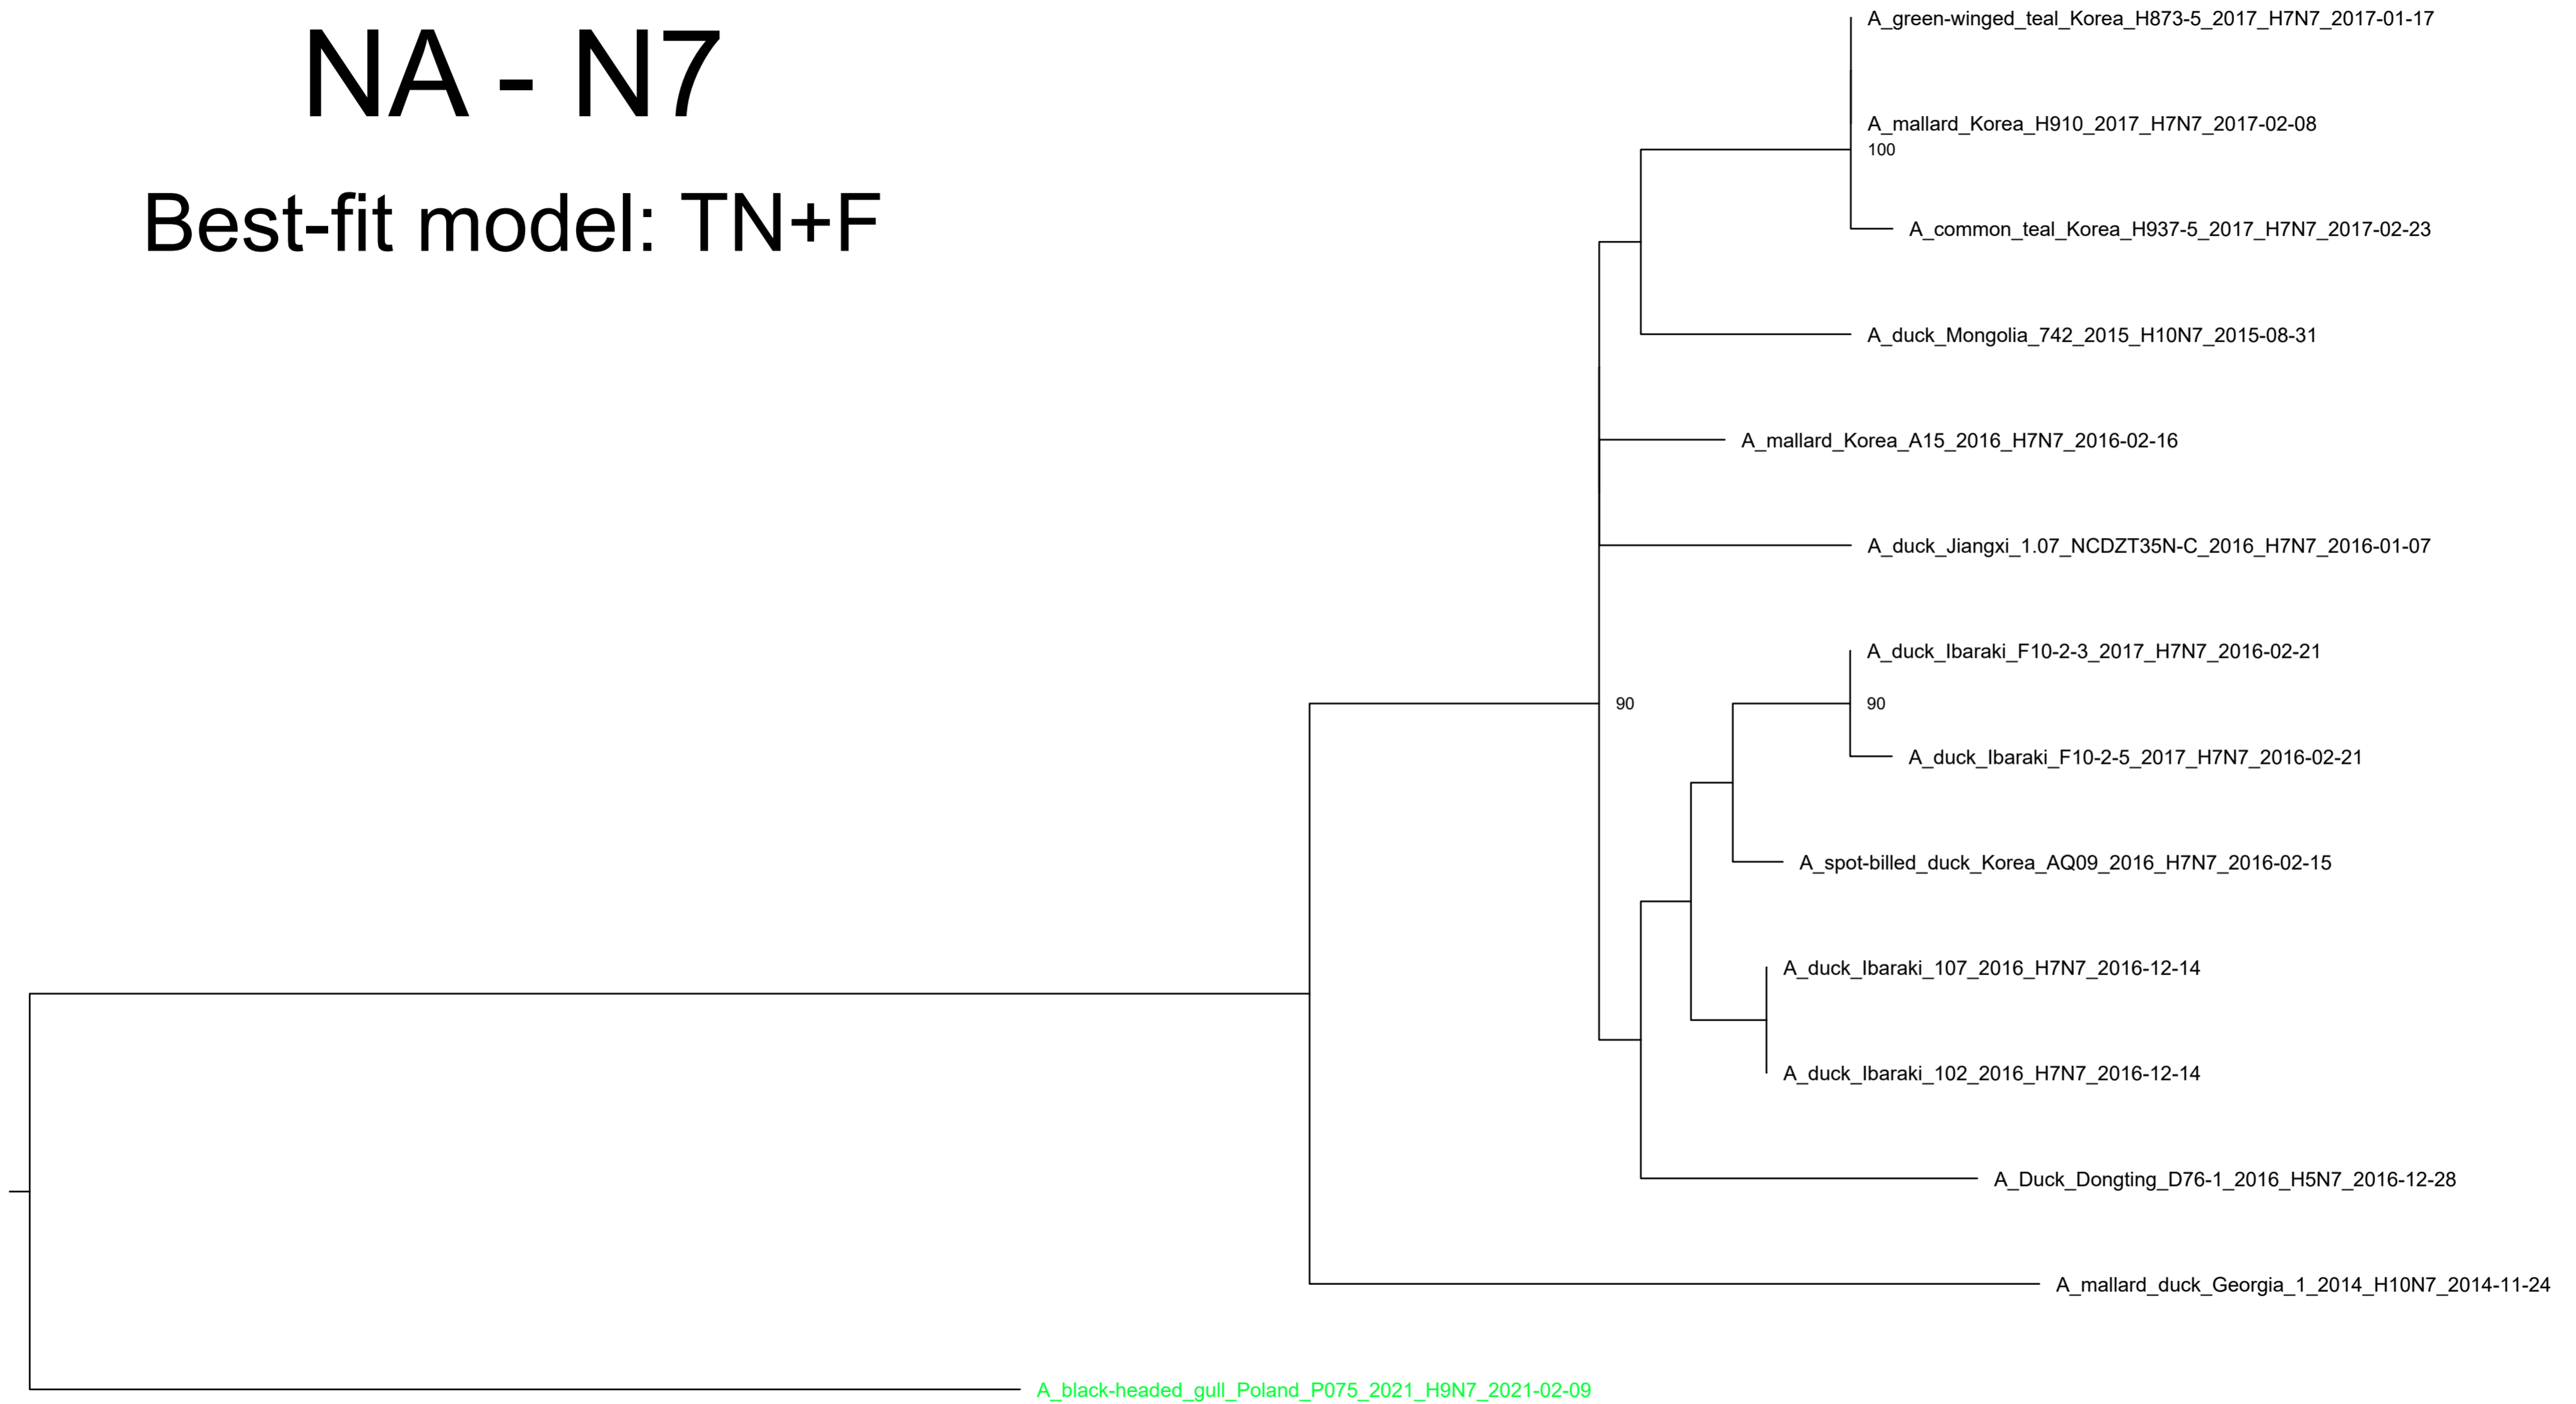

0.004



# NA - N8

Best-fit model: K3Pu+F+G4

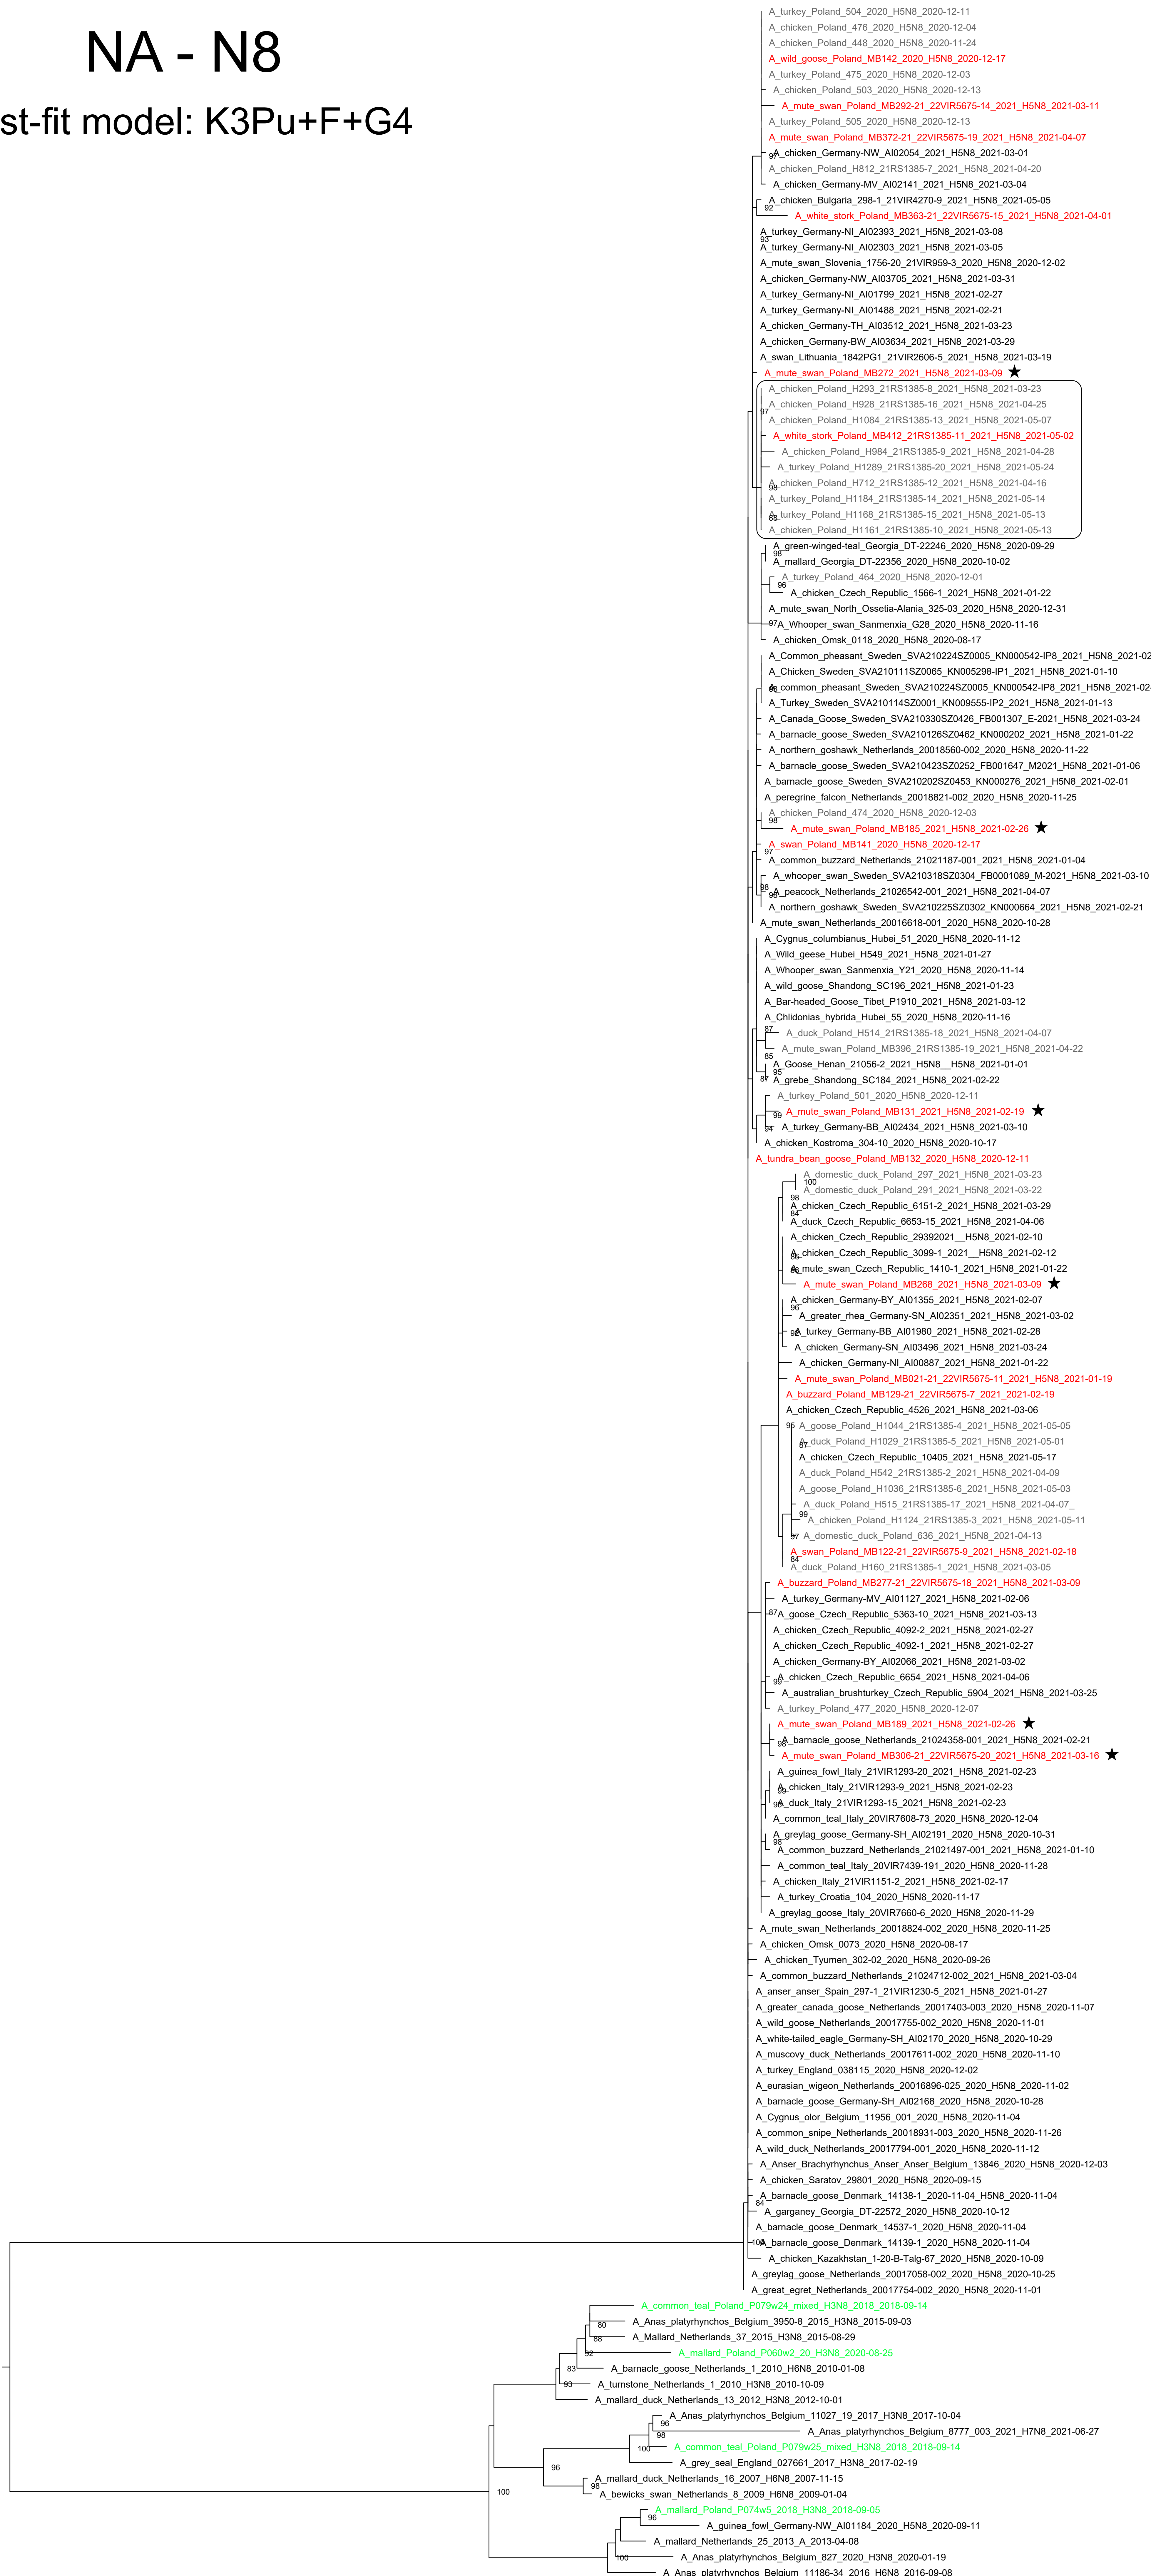

Supplement: f3 [file 6661672.f3.pdf]
