# Supplementary material for: Phylogenetic and Molecular Characteristics of Wild Bird‐Origin Avian Influenza Viruses Circulating in Poland in 2018−2022: Reassortment, Multiple Introductions, and Wild Bird–Poultry Epidemiological Links
Source: Hindawi journal article supplement (doi:10.1155/2024/6661672), 2024-01-01
Supplement: f1 [file 6661672.f1.pdf]

|                                        | No.                                | Surveillance type | Sample ID                            | Sequence name                                          | Isolate ID                                     | Collection/Submission date | City (incl. further details)                             | County                                    | Voivodeship                             | Species                                | Sample type                                                                                              | Subtype/genotype                                                                            |           |
|----------------------------------------|------------------------------------|-------------------|--------------------------------------|--------------------------------------------------------|------------------------------------------------|----------------------------|----------------------------------------------------------|-------------------------------------------|-----------------------------------------|----------------------------------------|----------------------------------------------------------------------------------------------------------|---------------------------------------------------------------------------------------------|-----------|
|                                        |                                    |                   |                                      |                                                        |                                                |                            |                                                          |                                           |                                         |                                        |                                                                                                          |                                                                                             |           |
| ACTIVE SURVEILLANCE 2018-2021 (LPAIVs) | 1                                  | active            | P074/18 w5                           | A/mallard/Poland/P074w5/2018                           | EPI_ISL_17978924                               | 05.09.2018                 | Darłowo                                                  | śląwieński                                | West Pomeranian Voivodeship             | mallard duck                           | cloacal swab                                                                                             | H3N8                                                                                        |           |
|                                        | 2                                  | active            | P077/18 w1                           | A/mallard/Poland/P077w1/2018                           | EPI_ISL_17978925                               | 12.09.2018                 | Braniewo                                                 | braniewski                                | Warmian-Masurian Voivodeship            | mallard duck                           | cloacal swab                                                                                             | H5N2                                                                                        |           |
|                                        | 3                                  | active            | P079/18 w24                          | A/common_teal/Poland/P079w24_mixed_H3N8/2018           | EPI_ISL_17982396                               | 14.09.2018                 | Jeziorsko (artificial reservoir)                         | sieradzki                                 | Łódź Voivodeship                        | common teal                            | cloacal swab                                                                                             | H3-H12-N8-N5 (co-infection)                                                                 |           |
|                                        |                                    |                   |                                      | A/common_teal/Poland/P079w24_mixed_H12N5/2018          | EPI_ISL_17982398                               |                            |                                                          |                                           |                                         |                                        |                                                                                                          |                                                                                             |           |
|                                        | 4                                  | active            | P079/18 w25                          | A/common_teal/Poland/P079w25_mixed_H3N8/2018           | EPI_ISL_17982400                               | 14.09.2018                 | Jeziorsko (artificial reservoir)                         | sieradzki                                 | Łódź Voivodeship                        | common teal                            | cloacal swab                                                                                             | H3-H12-N8-N5 (co-infection)                                                                 |           |
|                                        |                                    |                   |                                      | A/common_teal/Poland/P079w25_mixed_H12N5/2018          | EPI_ISL_17982402                               |                            |                                                          |                                           |                                         |                                        |                                                                                                          |                                                                                             |           |
|                                        | 5                                  | active            | P060/20 w2                           | A/mallard/Poland/P060w2/2020                           | EPI_ISL_17978926                               | 25.08.2020                 | Jawor                                                    | jaworski                                  | Lower Silesian Voivodeship              | mallard duck                           | cloacal swab                                                                                             | H3N8                                                                                        |           |
|                                        | 6                                  | active            | P071/20 w1                           | A/mute_swan/Poland/P071/2020                           | EPI_ISL_17978927                               | 18.09.2020                 | Jeziorsko (artificial reservoir)                         | sieradzki                                 | Łódź Voivodeship                        | mute swan                              | cloacal swab                                                                                             | H9N2                                                                                        |           |
|                                        | 7                                  | active            | P092/20                              | A/herring_gull/Poland/P092/2020                        | EPI_ISL_17978928                               | 28.10.2020                 | Jarosławiec                                              | śląwieński                                | West Pomeranian Voivodeship             | herring gull                           | cloacal swab                                                                                             | H16N3                                                                                       |           |
| 8                                      | active                             | P096/20 w2        | A/mallard/Poland/P096/2020           | EPI_ISL_17978951                                       | 02.11.2020                                     | Olsztyn                    | olsztyński                                               | Warmian-Masurian Voivodeship              | mallard duck                            | cloacal swab                           | H9N2                                                                                                     |                                                                                             |           |
| 9                                      | active                             | P075/21           | A/black-headed_gull/Poland/P075/2021 | EPI_ISL_17978956                                       | 09.02.2021                                     | Gdańsk                     | gdański                                                  | Pomeranian Voivodeship                    | black-headed gull                       | cloacal swab                           | H9N7                                                                                                     |                                                                                             |           |
| HPAI 2020-2021 (H5N8, H5N5, H5N1)      | 10                                 | passive           | MB132/20                             | A/tundra_bean_goose/Poland/MB132/2020                  | EPI_ISL_1220094                                | 11.12.2020                 | Gryfino                                                  | gryfiński                                 | West Pomeranian Voivodeship             | tundra bean goose                      | internal organs (liver, duodenum, pancreas, lungs), tracheal + cloacal swab*                             | H5N8                                                                                        |           |
|                                        | 11                                 | passive           | MB141/20                             | A/swan/Poland/MB141/2020                               | EPI_ISL_846623                                 | 17.12.2020                 | Ślupsk                                                   | ślupski                                   | Pomeranian Voivodeship                  | swan                                   | internal organs (spleen, kidneys, lungs, liver, duodenum, pancreas, trachea + oropharynx)                | H5N8                                                                                        |           |
|                                        | 12                                 | passive           | MB142/20                             | A/wild_goose/Poland/MB142/2020                         | EPI_ISL_846624                                 | 17.12.2020                 | Ślupsk                                                   | ślupski                                   | Pomeranian Voivodeship                  | wild goose                             | cloacal + tracheal swab*, internal organ (spleen, kidneys, liver, pancreas), intestines                  | H5N8                                                                                        |           |
|                                        | 13                                 | passive           | MB021/21                             | A/mute_swan/Poland/MB021-21-22VIR5675-11/2021          | EPI_ISL_18244181                               | 19.01.2021                 | Zławień Wielka                                           | toruński                                  | Kuyavian-Pomeranian Voivodeship         | mute swan                              | internal organs (lungs, spleen, kidneys, liver), intestines                                              | H5N8                                                                                        |           |
|                                        | 14                                 | passive           | MB061/21                             | A/tufted_duck/Poland/MB061/2021                        | EPI_ISL_1255051                                | 03.02.2021                 | Mielno                                                   | koszaliński                               | West Pomeranian Voivodeship             | tufted duck                            | internal organs (lungs, trachea), tracheal + cloacal swab*                                               | H5N5                                                                                        |           |
|                                        | 15                                 | passive           | MB122/21                             | A/swan/Poland/MB122-21_22VIR5675-9/2021                | EPI_ISL_18244493                               | 18.02.2021                 | Kórnické Lake (Kórník)                                   | pozański                                  | Greater Poland Voivodeship              | swan                                   | parenchymal organs, intestines                                                                           | H5N8                                                                                        |           |
|                                        | 16                                 | passive           | MB129/21                             | A/buzzard/Poland/MB129-21_22VIR5675-7/2021             | EPI_ISL_18244810                               | 19.02.2021                 | Brynek (Tworóg Commune)                                  | tarnogórski                               | Silesian Voivodeship                    | buzzard                                | cloacal + tracheal swab*                                                                                 | H5N8                                                                                        |           |
|                                        | 17                                 | passive           | MB131/21                             | A/mute_swan/Poland/MB131/2021                          | EPI_ISL_2111625                                | 19.02.2021                 | Władysławowo (Puck Bay)                                  | pucki                                     | Pomeranian Voivodeship                  | mute swan                              | internal organs (trachea, liver, kidney, lung, heart, spleen)                                            | H5N8                                                                                        |           |
|                                        | 18                                 | passive           | MB185/21                             | A/mute_swan/Poland/MB185/2021                          | EPI_ISL_2199986                                | 26.02.2021                 | Beka-Oslonino                                            | pucki                                     | Pomeranian Voivodeship                  | mute swan                              | internal organs (spleen, lung, kidney, intestines, heart, liver, trachea)                                | H5N8                                                                                        |           |
|                                        | 19                                 | passive           | MB189/21                             | A/mute_swan/Poland/MB189/2021                          | EPI_ISL_2113167                                | 26.02.2021                 | Gdynia (Beach Redłowo)                                   | pucki                                     | Pomeranian Voivodeship                  | mute swan                              | internal organs                                                                                          | H5N8                                                                                        |           |
|                                        | 20                                 | passive           | MB268/21                             | A/mute_swan/Poland/MB268/2021                          | EPI_ISL_2113493                                | 09.03.2021                 | Jastarnia (Puck Bay, beach)                              | pucki                                     | Pomeranian Voivodeship                  | mute swan                              | internal organs (heart, spleen, brain, trachea, kidney, liver, lungs), intestines                        | H5N8                                                                                        |           |
|                                        | 21                                 | passive           | MB272/21                             | A/mute_swan/Poland/MB272/2021                          | EPI_ISL_2114013                                | 09.03.2021                 | Stegna (Stegna Commune)                                  | nowodworski                               | Pomeranian Voivodeship                  | mute swan                              | oropharyngeal + cloacal swab*, internal organs, intestines                                               | H5N8                                                                                        |           |
|                                        | 22                                 | passive           | MB277/21                             | A/buzzard/Poland/MB277-21_22VIR5675-18/2021            | EPI_ISL_18244823                               | 09.03.2021                 | Wola Ładowska (Hów Commune)                              | sochaczewski                              | Masovian Voivodeship                    | buzzard                                | tracheal + cloacal swab*, brain tissue                                                                   | H5N8                                                                                        |           |
|                                        | 23                                 | passive           | MB292/21                             | A/mute_swan/Poland/MB292-21_22VIR5675-14/2021          | EPI_ISL_18245197                               | 11.03.2021                 | Sarbinowo (Mielno Commune)                               | koszaliński                               | West Pomeranian Voivodeship             | mute swan                              | internal organs (trachea, lungs, liver, kidney, spleen), brain tissue                                    | H5N8                                                                                        |           |
|                                        | 24                                 | passive           | MB306/21                             | A/mute_swan/Poland/MB306-21_22VIR5675-20/2021          | EPI_ISL_18245531                               | 16.03.2021                 | Gdańsk (Przegalińska Street 115-131, Martwa Wisła river) | gdański                                   | Pomeranian Voivodeship                  | mute swan                              | internal organs (lung, trachea), intestines, brain tissue (mute swan no.1)                               | H5N8                                                                                        |           |
|                                        | 25                                 | passive           | MB363/21                             | A/white_stork/Poland/MB363-21_22VIR5675-15/2021        | EPI_ISL_18245534                               | 01.04.2021                 | Możne 2G (Olecko Commune)                                | olecki                                    | Warmian-Masurian Voivodeship            | white stork                            | brain, internal organs, intestines                                                                       | H5N8                                                                                        |           |
|                                        | 26                                 | passive           | MB372/21                             | A/mute_swan/Poland/MB372-21_22VIR5675-19/2021          | EPI_ISL_18245535                               | 07.04.2021                 | Jeziro Samoleńskie (Wronki Commune)                      | szamotuński                               | Greater Poland Voivodeship              | mute swan                              | internal organs (liver, spleen, kidney, lung, trachea), intestines, brain, cloacal + oropharyngeal swab* | H5N8                                                                                        |           |
|                                        | 27                                 | passive           | MB391/21                             | A/white_stork/Poland/MB391/2021                        | EPI_ISL_2681045                                | 20.04.2021                 | tyśaków Drugi                                            | jędrzejowski                              | Świętokrzyskie (Holy Cross) Voivodeship | white stork                            | cloacal + tracheal swab*, brain tissue                                                                   | H5N1                                                                                        |           |
|                                        | 28                                 | passive           | MB396/21                             | A/mute_swan/Poland/MB396_21R51385-19/2021              | EPI_ISL_3102078                                | 21.04.2021                 | Morzyczo Lake                                            | gryfiński                                 | West Pomeranian Voivodeship             | mute swan                              | internal organs, oropharyngeal + cloacal swab*                                                           | H5N8                                                                                        |           |
|                                        | 29                                 | passive           | MB412/21                             | A/white_stork/Poland/MB412_21R51385-11/2021            | EPI_ISL_3102070                                | 02.05.2021                 | Biezuń (at the end of the Sierpecka Street on the right) | żuromiński                                | Masovian Voivodeship                    | white stork                            | oropharyngeal + cloacal swab*, brain                                                                     | H5N8                                                                                        |           |
|                                        | HPAI 2021-2022 (H5N1) + LPAIV H2N3 | 30                | passive                              | MB490/21                                               | A/mute_swan/Poland/MB490-11/2021               | EPI_ISL_6937114            | 09.11.2021                                               | Koło                                      | kołski                                  | Greater Poland Voivodship              | mute swan                                                                                                | oropharyngeal + cloacal swab*, internal organs (heart, liver, lungs), intestines            | H5N1 (G3) |
|                                        |                                    | 31                | passive                              | MB503/21                                               | A/grey_lag_goose/Poland/MB503_21R53290-18/2021 | EPI_ISL_18245810           | 22.11.2021                                               | Rybakówka                                 | siedlecki                               | Masovian Voivodeship                   | grey_lag_goose                                                                                           | internal organs, intestines                                                                 | H5N1 (G1) |
|                                        |                                    | 32                | passive                              | MB528/21                                               | A/crane/Poland/MB528/2021                      | EPI_ISL_18245811           | 10.12.2021                                               | Gleczanówek 25                            | łęczycki                                | Łódź Voivodeship                       | crane                                                                                                    | tracheal + cloacal swab*, brain                                                             | H5N1 (G1) |
|                                        |                                    | 33                | active (virological)                 | MW542/21                                               | A/wild_bird/Poland/MW542/2021                  | EPI_ISL_18245812           | 20.12.2021                                               | Turek (Turek Commune)                     | turecki                                 | Greater Poland Voivodeship             | mallard duck                                                                                             | cloacal swab -> virus isolate                                                               | H5N1 (G1) |
|                                        |                                    | 34                | passive                              | MB544/21                                               | A/hawk/Poland/MB544/2021                       | EPI_ISL_18245813           | 22.12.2021                                               | Parzęczew (Ozorkowska Street 10, 95-045)  | zgierski                                | Łódź Voivodeship                       | hawk                                                                                                     | tracheal + cloacal swab*, brain                                                             | H5N1 (G1) |
|                                        |                                    | 35                | passive                              | MB550/21                                               | A/mute_swan/Poland/MB550/2021                  | EPI_ISL_18245814           | 23.12.2021                                               | Niecemino Lake (Polanów Commune)          | koszaliński                             | West Pomeranian Voivodeship            | mute swan                                                                                                | tracheal + cloacal swab*, internal organs (lung, liver, spleen, kidney), intestines         | H5N1 (G1) |
|                                        |                                    | 36                | passive                              | MB551/21                                               | A/mute_swan/Poland/MB551/2021                  | EPI_ISL_18245815           | 23.12.2021                                               | Świecie (86-105)                          | świecki                                 | Kuyavian-Pomeranian Voivodship         | mute swan                                                                                                | brain, internal organs (trachea, lungs, liver, pancreas, kidney, spleen), intestines        | H5N1 (G1) |
|                                        |                                    | 37                | passive                              | MB008/22                                               | A/mute_swan/Poland/MB008-22_22VIR5675-16/2022  | EPI_ISL_18245597           | 05.01.2022                                               | Końskie (pond in the Browarna Street)     | konecki                                 | Świętokrzyskie (Holy Cross) Voivodship | mute swan                                                                                                | internal organs (heart, liver, lungs), intestines, cloacal + tracheal swab*                 | H5N1 (G1) |
|                                        |                                    | 38                | passive                              | MB020/22                                               | A/mute_swan/Poland/MB020-22_22VIR5675-3/2022   | EPI_ISL_18245613           | 11.01.2022                                               | Mostowo (Rosnowskie Lake, Manowo Commune) | koszaliński                             | West Pomeranian Voivodship             | mute swan                                                                                                | internal organs (lungs, spleen, kidney, liver), intestines, tracheal + cloacal swab*, brain | H5N1 (G1) |
| 39                                     |                                    | passive           | MB028/22                             | A/white-fronted_goose/Poland/MB028-22_22VIR5675-1/2022 | EPI_ISL_18245742                               | 14.01.2022                 | Kruszwica (88-150, Gopło Lake)                           | inowrocławski                             | Kuyavian-Pomeranian Voivodship          | white-fronted goose                    | internal organs (pancreas, lungs, trachea, spleen, liver, kidney), intestines, brain                     | H5N1 (G5)                                                                                   |           |
| 40                                     |                                    | passive           | MB034/22                             | A/mute_swan/Poland/MB034-22_22VIR5675-12/2022          | EPI_ISL_18245743                               | 18.01.2022                 | Michalice (pond, Namysłów Commune)                       | namysłowski                               | Opole Voivodship                        | mute swan                              | internal organs ( liver, spleen, trachea, kidney), intestines, brain                                     | H5N1 (G2)                                                                                   |           |
| 41                                     |                                    | passive           | MB040/22                             | A/mute_swan/Poland/MB040-22_22VIR5675-8/2022           | EPI_ISL_18245744                               | 20.01.2022                 | Końskie (pond in the Browarna Street)                    | konecki                                   | Świętokrzyskie (Holy Cross) Voivodship  | mute swan                              | internal organs (heart, liver, lung)                                                                     | H5N1 (G1)                                                                                   |           |
| 42                                     |                                    | passive           | MB042/22                             | A/mute_swan/Poland/MB042-22_22VIR5675-6/2022           | EPI_ISL_18245789                               | 24.01.2022                 | Wrzosey (56-100 Wołów Commune, ponds)                    | wołowski                                  | Lower Silesian Voivodship               | mute swan                              | liver, stomach, heart                                                                                    | H5N1 (G4)                                                                                   |           |
| 43                                     |                                    | passive           | MB058/22                             | A/swan/Poland/MB058-22_22VIR5675-2/2022                | EPI_ISL_18245790                               | 03.02.2022                 | sample collection in Wieliszew                           | legionowski                               | Masovian Voivodship                     | swan                                   | brain, tracheal + cloacal swab*                                                                          | H5N1 (G5)                                                                                   |           |
| 44                                     |                                    | passive           | MB078/22                             | A/swan/Poland/MB078_22VIR2515-7/2022                   | EPI_ISL_11922813                               | 15.02.2022                 | Brzeźce (Pokój Street, near to the lake)                 | pszczyński                                | Silesian Voivodeship                    | swan                                   | internal organs (lung, trachea, liver, spleen, kidney), brain, intestines                                | H5N1 (G6)                                                                                   |           |
| 45                                     |                                    | passive           | MB083/22                             | A/swan/Poland/MB083_22VIR2515-8/2022                   | EPI_ISL_11922814                               | 18.02.2022                 | Warszawa (Żerański Canal)                                | Warszawa                                  | Masovian Voivodship                     | swan                                   | oropharyngeal + cloacal swab*                                                                            | H5N1 (G1)                                                                                   |           |
| 46                                     |                                    | passive           | MB122/22                             | A/mute_swan/Poland/MB122/2022                          | EPI_ISL_18245816                               | 07.04.2022                 | Jemiołowo Lake                                           | olsztyński                                | Warmian-Masurian Voivodship             | mute swan                              | internal organs (trachea, pancreas), brain, intestines                                                   | H5N1 (G7)                                                                                   |           |
| 47                                     |                                    | passive           | MB138/22                             | A/herring_gull/Poland/MB138/2022                       | EPI_ISL_14917979                               | 30.05.2022                 | Pruszcz Gdański                                          | gdański                                   | Pomeranian Voivodship                   | herring gull                           | internal organs (trachea, pancreas)                                                                      | H5N1 (G2)                                                                                   |           |
| 48                                     |                                    | passive           | MB139/22                             | A/black-headed_gull/Poland/MB139/2022                  | EPI_ISL_14917999                               | 30.05.2022                 | Pruszcz Gdański                                          | gdański                                   | Pomeranian Voivodship                   | black-headed gull                      | internal organs (trachea, pancreas, lung)                                                                | H5N1 (G2)                                                                                   |           |
| 49                                     |                                    | passive           | MB142/22                             | A/sandwich_tern/Poland/MB142/2022                      | EPI_ISL_18245817                               | 15.06.2022                 | Pruszcz Gdański                                          | gdański                                   | Pomeranian Voivodship                   | sandwich tern                          | trachea, intestines                                                                                      | H5N1 (G2)                                                                                   |           |
| 50                                     |                                    | passive           | MB143/22                             | A/common_tern/Poland/MB143/2022                        | EPI_ISL_18245818                               | 15.06.2022                 | Pruszcz Gdański                                          | gdański                                   | Pomeranian Voivodship                   | common tern                            | trachea, intestines                                                                                      | H5N1 (G2)                                                                                   |           |
| 51                                     |                                    | passive           | MB151/22                             | A/common_murre/Poland/MB151/2022                       | EPI_ISL_14917968                               | 13.07.2022                 | Ustka                                                    | ślupski                                   | Pomeranian Voivodship                   | common murre                           | cloacal + tracheal swab*, brain                                                                          | H5N1 (G2)                                                                                   |           |
| 52                                     |                                    | passive           | MB152/22                             | A/swan/Poland/MB152/2022                               | EPI_ISL_18245819                               | 15.07.2022                 | Białobrzegi                                              | legionowski                               | Masovian Voivodship                     | swan                                   | brain + tracheal + cloacal swab*                                                                         | H2N3                                                                                        |           |

\* oropharyngeal/tracheal and cloacal swabs taken additionally from wild bird carcasses
