# Supplementary material for: Phylogenetic and Molecular Characteristics of Wild Bird‐Origin Avian Influenza Viruses Circulating in Poland in 2018−2022: Reassortment, Multiple Introductions, and Wild Bird–Poultry Epidemiological Links
Source: Hindawi journal article supplement (doi:10.1155/2024/6661672), 2024-01-01
Supplement: f4 [file 6661672.f4.pdf]

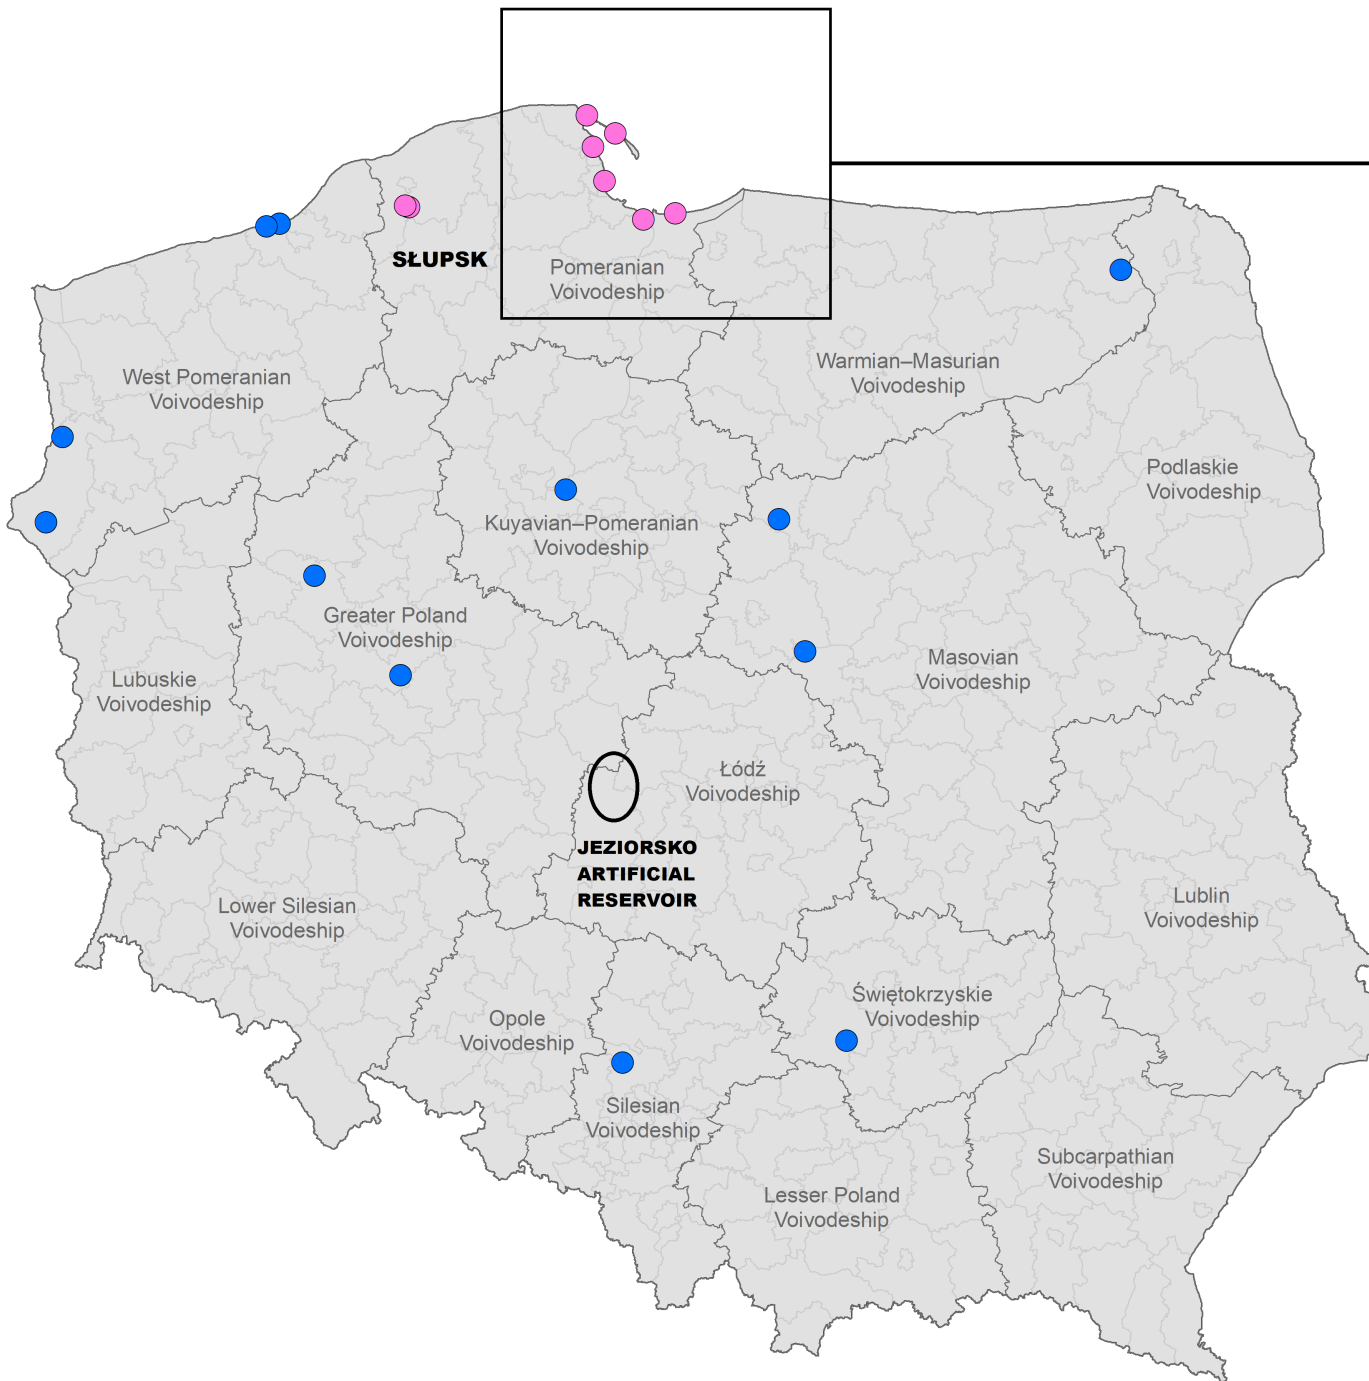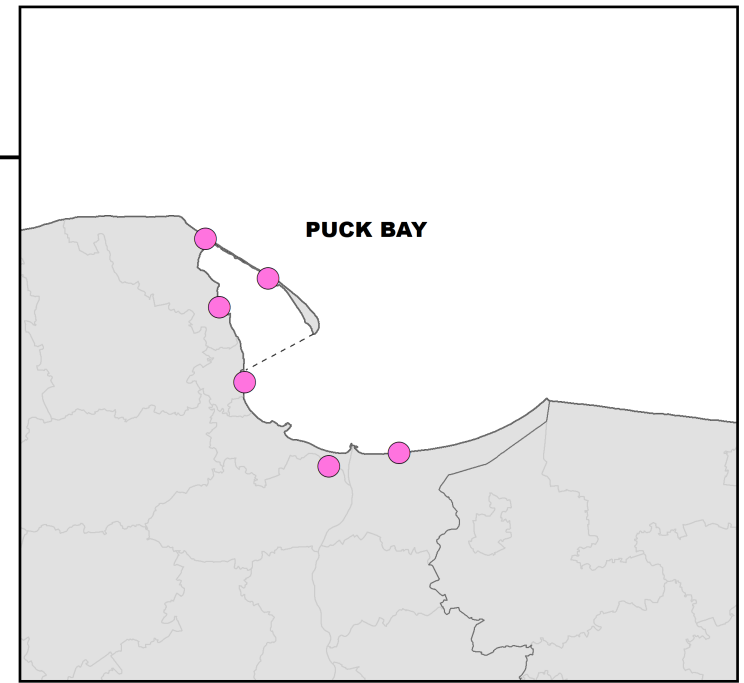

### Different virus introductions during HPAI 2020-2021

- HPAIV H5N8 introductions
- HPAIV H5Nx 2020-2021
