# Supplementary material for: Phylogenetic and Molecular Characteristics of Wild Bird‐Origin Avian Influenza Viruses Circulating in Poland in 2018−2022: Reassortment, Multiple Introductions, and Wild Bird–Poultry Epidemiological Links
Source: Hindawi journal article supplement (doi:10.1155/2024/6661672), 2024-01-01
Supplement: f5 [file 6661672.f5.pdf]

|                                                               |                                                                   | HA CLEAVAGE SITE                      |
|---------------------------------------------------------------|-------------------------------------------------------------------|---------------------------------------|
| ACTIVE SURVEILLANCE<br>2018-2021 (LPAIVs)                     | A/mallard/Poland/P074w5/2018_H3N8_2018-09-05                      | LP H3: PEKQTR/GLF                     |
|                                                               | A/mallard/Poland/P077w1/2018_H5N2_2018-09-12                      | LP H5: PQRETR/GLF                     |
|                                                               | A/common_teal/P079w24/2018_H3-H12-N8-N5_2018_09_14                | LP H3: PEKQTR/GLF, LP H12: PQVQDR/GLF |
|                                                               | A/common_teal/P079w24/2018_H3-H12-N8-N5_2018_09_14                |                                       |
|                                                               | A/mallard/Poland/P060w2/2020_H3N8_2020-08-25                      | LP H3: PEKQTR/GLF                     |
|                                                               | A/mute_swan/Poland/P071/2020_H9N2_2020-09-18                      | LP H9: PAVSDR/GLF                     |
|                                                               | A/herring_gull/Poland/P092/2020_H16N3_2020-10-28                  | LP H16: PSINER/GLF                    |
|                                                               | A/mallard/Poland/P096/2020_H9N2_2020-11-02                        | LP H9: PAASDR/GLF                     |
|                                                               | A/black-headed_gull/Poland/P075/2021_H9N7_2021-02-09              | LP H9: PATSDK/GLF                     |
| PASSIVE SURVEILLANCE<br>HPAI 2020/2021 (H5N8,<br>H5N1, H5N5)  | A/tundra-bean-geese/Poland/MB132/2020_H5N8_2020-12-11             | HP H5: PLREKRRKR/GLF                  |
|                                                               | A/swan/Poland/MB141/2020_H5N8_2020-12-17                          |                                       |
|                                                               | A/wild_goose/Poland/MB142/2020_H5N8_2020-12-17                    |                                       |
|                                                               | A/mute_swan/Poland/MB021-21_22VIR5675-11/2021_H5N8_2021-01-19     |                                       |
|                                                               | A/tufted_duck/Poland/MB061/2021_H5N5_2021-02-01                   |                                       |
|                                                               | A/swan/Poland/MB122-21_22VIR5675-9/2021_H5N8_2021-02-18           |                                       |
|                                                               | A/buzzard/Poland/MB129-21_22VIR5675-7/2021_2021-02-19             |                                       |
|                                                               | A/mute_swan/Poland/MB131/2021_H5N8_2021-02-19                     |                                       |
|                                                               | A/mute_swan/Poland/MB185/2021_H5N8_2021-02-26                     |                                       |
|                                                               | A/mute_swan/Poland/MB189/2021_H5N8_2021-02-26                     |                                       |
|                                                               | A/mute_swan/Poland/MB268/2021_H5N8_2021-03-09                     |                                       |
|                                                               | A/mute_swan/Poland/MB272/2021_H5N8_2021-03-09                     |                                       |
|                                                               | A/buzzard/Poland/MB277-21_22VIR5675-18/2021_H5N8_2021-03-09       |                                       |
|                                                               | A/mute_swan/Poland/MB292-21_22VIR5675-14/2021_H5N8_2021-03-11     |                                       |
|                                                               | A/mute_swan/Poland/MB306-21_22VIR5675-20/2021_H5N8_2021-03-16     |                                       |
|                                                               | A/white_stork/Poland/MB363-21_22VIR5675-15/2021_H5N8_2021-04-01   |                                       |
|                                                               | A/mute_swan/Poland/MB372-21_22VIR5675-19/2021_H5N8_2021-04-07     |                                       |
|                                                               | A/white_stork/Poland/MB391/2021_H5N1_2021-04-20                   |                                       |
| A/mute_swan/Poland/MB396_21RS1385-19/2021_H5N8_2021-04-21     |                                                                   |                                       |
| A/white_stork/Poland/MB412_21RS1385-11/2021_H5N8_2021-05-02   |                                                                   |                                       |
| PASSIVE SURVEILLANCE<br>HPAI 2021/2022 (H5N1)<br>+ LPAIV H2N3 | A/mute_swan/Poland/MB490-L1/2021_H5N1_2021-11-08                  | HP H5: SLREKRRKR/GLF                  |
|                                                               | A/greylag_goose/Poland/MB503_21RS3290-18/2021_H5N1_2021-11-22     | HP H5: PLREKRRKR/GLF                  |
|                                                               | A/crane/Poland/MB528/2021_H5N1_2021-12-10                         |                                       |
|                                                               | A/wild_bird/Poland/MW542/2021_H5N1_2021-12-20                     |                                       |
|                                                               | A/hawk/Poland/MB544/2021_H5N1_2021-12-22                          |                                       |
|                                                               | A/mute_swan/Poland/MB550/2021_H5N1_2021-12-23                     |                                       |
|                                                               | A/mute_swan/Poland/MB551/2021_H5N1_2021-12-23                     |                                       |
|                                                               | A/mute_swan/Poland/MB008-22_22VIR5675-16/2022_2022-01-05          |                                       |
|                                                               | A/mute_swan/Poland/MB020-22_22VIR5675-3/2022_H5N1_2022-01-11      |                                       |
|                                                               | A/white-fronted_goose/Poland/MB028-22_22VIR5675-1/2022_2022-01-14 |                                       |
|                                                               | A/mute_swan/Poland/MB034-22_22VIR5675-12/2022_H5N1_2022-01-18     |                                       |
|                                                               | A/mute_swan/Poland/MB040-22_22VIR5675-8/2022_H5N1_2022-01-20      |                                       |
|                                                               | A/mute_swan/Poland/MB042-22_22VIR5675-6/2022_H5N1_2022-01-24      |                                       |
|                                                               | A/swan/Poland/MB058-22_22VIR5675-2/2022_H5N1_2022-02-03           |                                       |
|                                                               | A/swan/Poland/MB078_22VIR2515-7/2022_H5N1_2022-02-15              |                                       |
|                                                               | A/swan/Poland/MB083_22VIR2515-8/2022_H5N1_2022-02-18              |                                       |
|                                                               | A/mute_swan/Poland/MB122/2022_H5N1_2022-04-07                     | HP H5: PLREKRRKR/GLF                  |
|                                                               | A/herring_gull/Poland/MB138/2022_H5N1_2022-05-30                  | HP H5: PLREKRRKR/GLF                  |
|                                                               | A/black-headed_gull/Poland/MB139/2022_H5N1_2022-05-30             |                                       |
|                                                               | A/sandwich_stern/Poland/MB142/2022_H5N1_2022-06-15                |                                       |
|                                                               | A/common_tern/Poland/MB143/2022_H5N1_2022-06-15                   |                                       |
| A/common_murre/Poland/MB151/2022_H5N1_2022-07-13              |                                                                   |                                       |
| A/swan/Poland/MB152/2022_H2N3_2022-07-15                      | LP H2: PQIESR/GLF                                                 |                                       |
