# Supplementary material for: Phylogenetic and Molecular Characteristics of Wild Bird‐Origin Avian Influenza Viruses Circulating in Poland in 2018−2022: Reassortment, Multiple Introductions, and Wild Bird–Poultry Epidemiological Links
Source: Hindawi journal article supplement (doi:10.1155/2024/6661672), 2024-01-01
Supplement: f6 [file 6661672.f6.pdf]

|                                                               |                                                                   | PB2 |       |       |       |       |       |       |              |                                                      |
|---------------------------------------------------------------|-------------------------------------------------------------------|-----|-------|-------|-------|-------|-------|-------|--------------|------------------------------------------------------|
|                                                               |                                                                   | D9N | I292V | K389R | K526R | Q591K | V598T | S715N | L89V + G309D | L89V + G309D + T339K + R477G + I495V + K627E + A676T |
| ACTIVE SURVEILLANCE<br>2018-2021 (LPAIVs)                     | A/mallard/Poland/P074w5/2018_H3N8_2018-09-05                      |     |       | X     |       |       | X     | X     | X            | X                                                    |
|                                                               | A/mallard/Poland/P077w1/2018_H5N2_2018-09-12                      |     |       | X     |       |       | X     | X     | X            | X                                                    |
|                                                               | A/common_teal/P079w24/2018_H3-H12-N8-N5_2018_09_14                |     |       | X     |       |       | X     | X     | X            | X                                                    |
|                                                               | A/common_teal/P079w24/2018_H3-H12-N8-N5_2018_09_14                |     |       | X     |       |       | X     | X     | X            | X                                                    |
|                                                               | A/mallard/Poland/P060w2/2020_H3N8_2020-08-25                      |     |       | X     |       | X     | X     | X     | X            | X                                                    |
|                                                               | A/mute_swan/Poland/P071/2020_H9N2_2020-09-18                      |     |       | X     |       |       | X     | X     | X            | X                                                    |
|                                                               | A/herring_gull/Poland/P092/2020_H16N3_2020-10-28                  |     | X     | X     |       |       | X     | X     | X            | X                                                    |
|                                                               | A/mallard/Poland/P096/2020_H9N2_2020-11-02                        |     |       | X     |       |       | X     | X     | X            |                                                      |
| A/black-headed_gull/Poland/P075/2021_H9N7_2021-02-09          |                                                                   |     | X     |       |       | X     | X     | X     | X            |                                                      |
| PASSIVE SURVEILLANCE<br>HPAI 2020/2021 (H5N8,<br>H5N1, H5N5)  | A/tundra-bean-goose/Poland/MB132/2020_H5N8_2020-12-11             |     | X     | X     |       |       | X     | X     | X            | X                                                    |
|                                                               | A/swan/Poland/MB141/2020_H5N8_2020-12-17                          |     | X     | X     |       |       | X     | X     | X            | X                                                    |
|                                                               | A/wild_goose/Poland/MB142/2020_H5N8_2020-12-17                    |     | X     | X     |       |       | X     | X     | X            | X                                                    |
|                                                               | A/mute_swan/Poland/MB021-21_22VIR5675-11/2021_H5N8_2021-01-19     |     | X     | X     |       |       | X     | X     | X            | X                                                    |
|                                                               | A/tufted_duck/Poland/MB061/2021_H5N5_2021-02-01                   |     |       | X     |       |       | X     | X     | X            | X                                                    |
|                                                               | A/swan/Poland/MB122-21_22VIR5675-9/2021_H5N8_2021-02-18           |     | X     | X     |       |       | X     | X     | X            | X                                                    |
|                                                               | A/buzzard/Poland/MB129-21_22VIR5675-7/2021_2021-02-19             |     | X     | X     |       |       | X     | X     | X            | X                                                    |
|                                                               | A/mute_swan/Poland/MB131/2021_H5N8_2021-02-19                     |     | X     | X     |       |       | X     | X     | X            | X                                                    |
|                                                               | A/swan/Poland/MB185/2021_H5N8_2021-02-26                          |     | X     | X     |       |       | X     | X     | X            | X                                                    |
|                                                               | A/mute_swan/Poland/MB189/2021_H5N8_2021-02-26                     |     | X     | X     |       |       | X     | X     | X            | X                                                    |
|                                                               | A/mute_swan/Poland/MB268/2021_H5N8_2021-03-09                     |     | X     | X     |       |       | X     | X     | X            | X                                                    |
|                                                               | A/mute_swan/Poland/MB272/2021_H5N8_2021-03-09                     |     | X     | X     |       |       | X     | X     | X            | X                                                    |
|                                                               | A/buzzard/Poland/MB277-21_22VIR5675-18/2021_H5N8_2021-03-09       |     | X     | X     |       |       | X     | X     | X            | X                                                    |
|                                                               | A/avian/Poland/MB292-21_22VIR5675-14/2021_H5N8_2021-03-11         |     | X     | X     |       |       | X     | X     | X            | X                                                    |
|                                                               | A/mute_swan/Poland/MB306-21_22VIR5675-20/2021_H5N8_2021-03-16     |     | X     | X     |       |       | X     | X     | X            | X                                                    |
|                                                               | A/white_stork/Poland/MB363-21_22VIR5675-15/2021_H5N8_2021-04-01   |     | X     | X     |       |       | X     | X     | X            | X                                                    |
|                                                               | A/mute_swan/Poland/MB372-21_22VIR5675-19/2021_H5N8_2021-04-07     |     | X     | X     |       |       | X     | X     | X            | X                                                    |
|                                                               | A/white_stork/Poland/MB391/2021_H5N1_2021-04-20                   |     |       | X     |       |       | X     | X     | X            | X                                                    |
| A/mute_swan/Poland/MB396_21RS1385-19/2021_H5N8_2021-04-21     |                                                                   | X   | X     |       |       | X     | X     | X     | X            |                                                      |
| A/white_stork/Poland/MB412_21RS1385-11/2021_H5N8_2021-05-02   |                                                                   | X   | X     |       |       | X     | X     | X     | X            |                                                      |
| PASSIVE SURVEILLANCE<br>HPAI 2021/2022 (H5N1)<br>+ LPAIV H2N3 | A/mute_swan/Poland/MB490-L1/2021_H5N1_2021-11-08                  |     |       | X     |       |       | X     | X     | X            | X                                                    |
|                                                               | A/greylag_goose/Poland/MB503_21RS3290-18/2021_H5N1_2021-11-22     |     |       | X     |       |       | X     | X     | X            | X                                                    |
|                                                               | A/crane/Poland/MB528/2021_H5N1_2021-12-10                         |     |       | X     |       |       | X     | X     | X            | X                                                    |
|                                                               | A/wild_bird/Poland/MW542/2021_H5N1_2021-12-20                     | X   |       | X     |       |       | X     | X     |              |                                                      |
|                                                               | A/hawk/Poland/MB544/2021_H5N1_2021-12-22                          | X   |       | X     |       |       | X     | X     |              |                                                      |
|                                                               | A/mute_swan/Poland/MB550/2021_H5N1_2021-12-23                     |     |       | X     |       |       | X     | X     |              |                                                      |
|                                                               | A/mute_swan/Poland/MB551/2021_H5N1_2021-12-23                     |     |       | X     |       |       | X     | X     | X            | X                                                    |
|                                                               | A/mute_swan/Poland/MB008-22_22VIR5675-16/2022_2022-01-05          |     |       |       |       |       | X     | X     | X            | NA                                                   |
|                                                               | A/mute_swan/Poland/MB020-22_22VIR5675-3/2022_H5N1_2022-01-11      |     |       | X     |       |       | X     | X     | X            | X                                                    |
|                                                               | A/white-fronted_goose/Poland/MB028-22_22VIR5675-1/2022_2022-01-14 |     |       | X     |       |       | X     | X     | X            | X                                                    |
|                                                               | A/mute_swan/Poland/MB034-22_22VIR5675-12/2022_H5N1_2022-01-18     |     |       | X     | X     |       | X     | X     | X            | X                                                    |
|                                                               | A/mute_swan/Poland/MB040-22_22VIR5675-8/2022_H5N1_2022-01-20      |     |       | NA    | NA    |       |       | X     | X            | NA                                                   |
|                                                               | A/mute_swan/Poland/MB042-22_22VIR5675-6/2022_H5N1_2022-01-24      |     |       | X     |       |       | X     | X     |              |                                                      |
|                                                               | A/swan/Poland/MB058-22_22VIR5675-2/2022_H5N1_2022-02-03           |     |       | X     |       |       | X     | X     | X            | X                                                    |
|                                                               | A/swan/Poland/MB078_22VIR2515-7/2022_H5N1_2022-02-15              |     |       | X     |       |       | X     | X     | X            | X                                                    |
|                                                               | A/swan/Poland/MB083_22VIR2515-8/2022_H5N1_2022-02-18              |     |       | X     |       |       | X     | X     | X            | X                                                    |
|                                                               | A/mute_swan/Poland/MB122/2022_H5N1_2022-04-07                     |     |       | X     |       |       | X     | X     | X            |                                                      |
|                                                               | A/herring_gull/Poland/MB138/2022_H5N1_2022-05-30                  |     |       | X     |       |       | X     | X     | X            | X                                                    |
|                                                               | A/black-headed_gull/Poland/MB139/2022_H5N1_2022-05-30             |     |       | X     |       |       | X     | X     | X            | X                                                    |
|                                                               | A/sandwich_stern/Poland/MB142/2022_H5N1_2022-06-15                |     |       | X     |       |       | X     | X     | X            | X                                                    |
| A/common_tern/Poland/MB143/2022_H5N1_2022-06-15               |                                                                   |     | X     |       |       | X     | X     | X     | X            |                                                      |
| A/common_mure/Poland/MB151/2022_H5N1_2022-07-13               |                                                                   |     | X     |       |       | X     | X     | X     | X            |                                                      |
| A/swan/Poland/MB152/2022_H2N3_2022-07-15                      |                                                                   |     | X     |       |       | X     | X     | X     | X            |                                                      |

NA = not applicable ("N" in the sequence)  
X = present in the sequence

|                                                               |                                                                   | PB1 |       |       | PB1-F2             |      |
|---------------------------------------------------------------|-------------------------------------------------------------------|-----|-------|-------|--------------------|------|
|                                                               |                                                                   | D3V | D622G | S678N | truncated to 11 aa | N66S |
| ACTIVE SURVEILLANCE<br>2018-2021 (LPAIVs)                     | A/mallard/Poland/P074w5/2018_H3N8_2018-09-05                      | X   | X     |       |                    | X    |
|                                                               | A/mallard/Poland/P077w1/2018_H5N2_2018-09-12                      | X   | X     |       |                    |      |
|                                                               | A/common_teal/P079w24/2018_H3-H12-N8-N5_2018_09_14                | X   | X     |       |                    |      |
|                                                               | A/common_teal/P079w24/2018_H3-H12-N8-N5_2018_09_14                | X   | X     |       |                    |      |
|                                                               | A/mallard/Poland/P060w2/20_H3N8_2020-08-25                        | X   | X     |       |                    | X    |
|                                                               | A/mute_swan/Poland/P071/2020_H9N2_2020-09-18                      | X   | X     |       |                    |      |
|                                                               | A/herring_gull/Poland/P092/20_H16N3_2020-10-28                    | X   | X     |       |                    |      |
|                                                               | A/mallard/Poland/P096/2020_H9N2_2020-11-02                        | X   | X     |       |                    | X    |
| A/black-headed_gull/Poland/P075/2021_H9N7_2021-02-09          | X                                                                 | X   |       |       | X                  |      |
| PASSIVE SURVEILLANCE<br>HPAI 2020/2021 (H5N8,<br>H5N1, H5N5)  | A/tundra-bean-goose/Poland/MB132/2020_H5N8_2020-12-11             | X   | X     |       | X                  |      |
|                                                               | A/swan/Poland/MB141/2020_H5N8_2020-12-17                          | X   | X     |       | X                  |      |
|                                                               | A/wild_goose/Poland/MB142/2020_H5N8_2020-12-17                    | X   | X     |       | X                  |      |
|                                                               | A/mute_swan/Poland/MB021-21_22VIR5675-11/2021_H5N8_2021-01-19     | X   | X     |       | X                  |      |
|                                                               | A/tufted_duck/Poland/MB061/2021_H5N5_2021-02-01                   | X   | X     |       |                    |      |
|                                                               | A/swan/Poland/MB122-21_22VIR5675-9/2021_H5N8_2021-02-18           | X   | X     |       | X                  |      |
|                                                               | A/buzzard/Poland/MB129-21_22VIR5675-7/2021_2021-02-19             | X   | X     |       | X                  |      |
|                                                               | A/mute_swan/Poland/MB131/2021_H5N8_2021-02-19                     | X   | X     |       | X                  |      |
|                                                               | A/swan/Poland/MB185/2021_H5N8_2021-02-26                          | X   | X     |       | X                  |      |
|                                                               | A/mute_swan/Poland/MB189/2021_H5N8_2021-02-26                     | X   | X     |       | X                  |      |
|                                                               | A/mute_swan/Poland/MB268/2021_H5N8_2021-03-09                     | X   | X     |       | X                  |      |
|                                                               | A/mute_swan/Poland/MB272/2021_H5N8_2021-03-09                     | X   | X     |       | X                  |      |
|                                                               | A/buzzard/Poland/MB277-21_22VIR5675-18/2021_H5N8_2021-03-09       | X   | X     |       | X                  |      |
|                                                               | A/avian/Poland/MB292-21_22VIR5675-14/2021_H5N8_2021-03-11         | X   | X     |       | X                  |      |
|                                                               | A/mute_swan/Poland/MB306-21_22VIR5675-20/2021_H5N8_2021-03-16     | X   | X     |       | X                  |      |
|                                                               | A/white_stork/Poland/MB363-21_22VIR5675-15/2021_H5N8_2021-04-01   | X   | X     |       | X                  |      |
|                                                               | A/mute_swan/Poland/MB372-21_22VIR5675-19/2021_H5N8_2021-04-07     | X   | X     |       | X                  |      |
| A/white_stork/Poland/MB391/2021_H5N1_2021-04-20               | X                                                                 | X   |       |       |                    |      |
| A/mute_swan/Poland/MB396_21RS1385-19/2021_H5N8_2021-04-21     | X                                                                 | X   | X     | X     |                    |      |
| A/white_stork/Poland/MB412_21RS1385-11/2021_H5N8_2021-05-02   | X                                                                 | X   |       | X     |                    |      |
| PASSIVE SURVEILLANCE<br>HPAI 2021/2022 (H5N1)<br>+ LPAIV H2N3 | A/mute_swan/Poland/MB490-L1/2021_H5N1_2021-11-08                  | X   | X     |       |                    | X    |
|                                                               | A/greylag_goose/Poland/MB503_21RS3290-18/2021_H5N1_2021-11-22     | X   | X     |       |                    | X    |
|                                                               | A/crane/Poland/MB528/2021_H5N1_2021-12-10                         | X   | X     |       |                    | X    |
|                                                               | A/wild_bird/Poland/MW542/2021_H5N1_2021-12-20                     | X   | X     |       |                    | X    |
|                                                               | A/hawk/Poland/MB544/2021_H5N1_2021-12-22                          | X   | X     |       |                    | X    |
|                                                               | A/mute_swan/Poland/MB550/2021_H5N1_2021-12-23                     | X   | X     |       |                    | X    |
|                                                               | A/mute_swan/Poland/MB551/2021_H5N1_2021-12-23                     | X   | X     |       |                    | X    |
|                                                               | A/mute_swan/Poland/MB008-22_22VIR5675-16/2022_2022-01-05          | X   | X     |       |                    | X    |
|                                                               | A/mute_swan/Poland/MB020-22_22VIR5675-3/2022_H5N1_2022-01-11      | X   | X     |       |                    | X    |
|                                                               | A/white-fronted_goose/Poland/MB028-22_22VIR5675-1/2022_2022-01-14 | X   | X     |       |                    | X    |
|                                                               | A/mute_swan/Poland/MB034-22_22VIR5675-12/2022_H5N1_2022-01-18     | X   | X     |       |                    | X    |
|                                                               | A/mute_swan/Poland/MB040-22_22VIR5675-8/2022_H5N1_2022-01-20      | X   | X     |       |                    | X    |
|                                                               | A/mute_swan/Poland/MB042-22_22VIR5675-6/2022_H5N1_2022-01-24      | X   | X     |       |                    | X    |
|                                                               | A/swan/Poland/MB058-22_22VIR5675-2/2022_H5N1_2022-02-03           | X   | X     |       |                    | X    |
|                                                               | A/swan/Poland/MB078_22VIR2515-7/2022_H5N1_2022-02-15              | X   | X     |       |                    | X    |
|                                                               | A/swan/Poland/MB083_22VIR2515-8/2022_H5N1_2022-02-18              | X   | X     |       |                    | X    |
|                                                               | A/mute_swan/Poland/MB122/2022_H5N1_2022-04-07                     | X   | X     |       |                    |      |
|                                                               | A/herring_gull/Poland/MB138/2022_H5N1_2022-05-30                  | X   | X     |       |                    | X    |
|                                                               | A/black-headed_gull/Poland/MB139/2022_H5N1_2022-05-30             | X   | X     |       |                    | X    |
|                                                               | A/sandwich_stern/Poland/MB142/2022_H5N1_2022-06-15                | X   | X     |       |                    | X    |
| A/common_tern/Poland/MB143/2022_H5N1_2022-06-15               | X                                                                 | X   |       |       | X                  |      |
| A/common_mure/Poland/MB151/2022_H5N1_2022-07-13               | X                                                                 | X   |       |       | X                  |      |
| A/swan/Poland/MB152/2022_H2N3_2022-07-15                      | X                                                                 | X   |       |       | X                  |      |

NA = not applicable ("N" in the sequence)  
X = present in the sequence

|                                                               |                                                                   | PA   |       |       |       |       |       |
|---------------------------------------------------------------|-------------------------------------------------------------------|------|-------|-------|-------|-------|-------|
|                                                               |                                                                   | S37A | K158R | P190S | N383D | Q400P | N409S |
| ACTIVE SURVEILLANCE<br>2018-2021 (LPAIVs)                     | A/mallard/Poland/P074w5/2018_H3N8_2018-09-05                      | X    |       | X     | X     |       | X     |
|                                                               | A/mallard/Poland/P077w1/2018_H5N2_2018-09-12                      | X    |       | X     | X     |       | X     |
|                                                               | A/common_teal/P079w24/2018_H3-H12-N8-N5_2018_09_14                | X    |       | X     | X     |       | X     |
|                                                               | A/common_teal/P079w24/2018_H3-H12-N8-N5_2018_09_14                | X    |       | X     | X     |       | X     |
|                                                               | A/mallard/Poland/P060w2/20_H3N8_2020-08-25                        | X    |       | X     | X     |       | X     |
|                                                               | A/mute_swan/Poland/P071/2020_H9N2_2020-09-18                      | X    |       | X     | X     |       | X     |
|                                                               | A/herring_gull/Poland/P092/20_H16N3_2020-10-28                    | X    |       | X     | X     |       | X     |
|                                                               | A/mallard/Poland/P096/2020_H9N2_2020-11-02                        | X    |       | X     | X     |       | X     |
| A/black-headed_gull/Poland/P075/2021_H9N7_2021-02-09          | X                                                                 |      | X     | X     |       | X     |       |
| PASSIVE SURVEILLANCE<br>HPAI 2020/2021 (H5N8,<br>H5N1, H5N5)  | A/tundra-bean-goose/Poland/MB132/2020_H5N8_2020-12-11             | X    |       | X     | X     |       | X     |
|                                                               | A/swan/Poland/MB141/2020_H5N8_2020-12-17                          | X    |       | X     | X     |       | X     |
|                                                               | A/wild_goose/Poland/MB142/2020_H5N8_2020-12-17                    | X    |       | X     | X     |       | X     |
|                                                               | A/mute_swan/Poland/MB021-21_22VIR5675-11/2021_H5N8_2021-01-19     | X    |       | X     | X     |       | X     |
|                                                               | A/tufted_duck/Poland/MB061/2021_H5N5_2021-02-01                   | X    |       | X     | X     |       | X     |
|                                                               | A/swan/Poland/MB122-21_22VIR5675-9/2021_H5N8_2021-02-18           | X    |       | X     | X     |       | X     |
|                                                               | A/buzzard/Poland/MB129-21_22VIR5675-7/2021_H5N8_2021-02-19        | X    |       | X     | X     |       | X     |
|                                                               | A/mute_swan/Poland/MB131/2021_H5N8_2021-02-19                     | X    |       | X     | X     |       | X     |
|                                                               | A/swan/Poland/MB185/2021_H5N8_2021-02-26                          | X    |       | X     | X     |       | X     |
|                                                               | A/mute_swan/Poland/MB189/2021_H5N8_2021-02-26                     | X    |       | X     | X     |       | X     |
|                                                               | A/mute_swan/Poland/MB268/2021_H5N8_2021-03-09                     | X    |       | X     | X     |       | X     |
|                                                               | A/mute_swan/Poland/MB272/2021_H5N8_2021-03-09                     | X    |       | X     | X     |       | X     |
|                                                               | A/buzzard/Poland/MB277-21_22VIR5675-18/2021_H5N8_2021-03-09       | X    |       | X     | X     |       | X     |
|                                                               | A/avian/Poland/MB292-21_22VIR5675-14/2021_H5N8_2021-03-11         | X    |       | X     | X     |       | X     |
|                                                               | A/mute_swan/Poland/MB306-21_22VIR5675-20/2021_H5N8_2021-03-16     | X    |       | X     | X     |       | X     |
|                                                               | A/white_stork/Poland/MB363-21_22VIR5675-15/2021_H5N8_2021-04-01   | X    |       | X     | X     |       | X     |
|                                                               | A/mute_swan/Poland/MB372-21_22VIR5675-19/2021_H5N8_2021-04-07     | X    |       | X     | X     |       | X     |
|                                                               | A/white_stork/Poland/MB391/2021_H5N1_2021-04-20                   | X    |       | X     | X     |       | X     |
| A/mute_swan/Poland/MB396_21RS1385-19/2021_H5N8_2021-04-21     | X                                                                 |      | X     | X     |       | X     |       |
| A/white_stork/Poland/MB412_21RS1385-11/2021_H5N8_2021-05-02   | X                                                                 |      | X     | X     |       | X     |       |
| PASSIVE SURVEILLANCE<br>HPAI 2021/2022 (H5N1)<br>+ LPAIV H2N3 | A/mute_swan/Poland/MB490-L1/2021_H5N1_2021-11-08                  | X    |       | X     | X     |       | X     |
|                                                               | A/greylag_goose/Poland/MB503_21RS3290-18/2021_H5N1_2021-11-22     | X    |       | X     | X     | X     | X     |
|                                                               | A/crane/Poland/MB528/2021_H5N1_2021-12-10                         | X    |       | X     | X     | X     | X     |
|                                                               | A/wild_bird/Poland/MW542/2021_H5N1_2021-12-20                     | X    |       | X     | X     | X     | X     |
|                                                               | A/hawk/Poland/MB544/2021_H5N1_2021-12-22                          | X    |       | X     | X     | X     | X     |
|                                                               | A/mute_swan/Poland/MB550/2021_H5N1_2021-12-23                     | X    |       | X     | X     | X     | X     |
|                                                               | A/mute_swan/Poland/MB551/2021_H5N1_2021-12-23                     | X    |       | X     | X     | X     | X     |
|                                                               | A/mute_swan/Poland/MB008-22_22VIR5675-16/2022_2022-01-05          | X    |       | X     | X     | X     | X     |
|                                                               | A/mute_swan/Poland/MB020-22_22VIR5675-3/2022_H5N1_2022-01-11      | X    |       | X     | X     | X     | X     |
|                                                               | A/white-fronted_goose/Poland/MB028-22_22VIR5675-1/2022_2022-01-14 | X    | X     | X     | X     | X     | X     |
|                                                               | A/mute_swan/Poland/MB034-22_22VIR5675-12/2022_H5N1_2022-01-18     | X    |       | X     | X     |       | X     |
|                                                               | A/mute_swan/Poland/MB040-22_22VIR5675-8/2022_H5N1_2022-01-20      | X    | NA    | NA    | NA    |       | X     |
|                                                               | A/mute_swan/Poland/MB042-22_22VIR5675-6/2022_H5N1_2022-01-24      | X    |       | X     | X     | X     | X     |
|                                                               | A/swan/Poland/MB058-22_22VIR5675-2/2022_H5N1_2022-02-03           | X    | X     | X     | X     | X     | X     |
|                                                               | A/swan/Poland/MB078_22VIR2515-7/2022_H5N1_2022-02-15              | X    |       | X     | X     |       | X     |
|                                                               | A/swan/Poland/MB083_22VIR2515-8/2022_H5N1_2022-02-18              | X    |       | X     | X     | X     | X     |
|                                                               | A/mute_swan/Poland/MB122/2022_H5N1_2022-04-07                     | X    |       | X     | X     |       | X     |
|                                                               | A/herring_gull/Poland/MB138/2022_H5N1_2022-05-30                  | X    |       | X     | X     |       | X     |
|                                                               | A/black-headed_gull/Poland/MB139/2022_H5N1_2022-05-30             | X    |       | X     | X     |       | X     |
|                                                               | A/sandwich_stern/Poland/MB142/2022_H5N1_2022-06-15                | X    |       | X     | X     |       | X     |
| A/common_tern/Poland/MB143/2022_H5N1_2022-06-15               | X                                                                 |      | X     | X     |       | X     |       |
| A/common_mure/Poland/MB151/2022_H5N1_2022-07-13               | X                                                                 |      | X     | X     |       | X     |       |
| A/swan/Poland/MB152/2022_H2N3_2022-07-15                      | X                                                                 |      | X     | X     |       | X     |       |

NA = not applicable ("N" in the sequence)  
X = present in the sequence

|                                                                |                                                                   | H5 numbering |       |       |       |       |       |       |       |               |               |               |
|----------------------------------------------------------------|-------------------------------------------------------------------|--------------|-------|-------|-------|-------|-------|-------|-------|---------------|---------------|---------------|
|                                                                |                                                                   | S123P        | A133A | S154N | S155N | T156A | V182N | V210I | K394E | S107R + T108I | S155N + T156A | K218Q + S223R |
| <b>ACTIVE SURVEILLANCE 2018-2021 (LPAIVs)</b>                  | A/mallard/Poland/P077w1/2018_H5N2_2018-09-12                      | X            |       | X     | X     | X     | X     |       | X     |               | X             |               |
| <b>PASSIVE SURVEILLANCE HPAI 2020/2021 (H5N8)</b>              | A/tundra-bean-goose/Poland/MB132/2020_H5N8_2020-12-11             | X            | X     | X     |       | X     | X     |       | X     | X             |               | X             |
|                                                                | A/swan/Poland/MB141/2020_H5N8_2020-12-17                          | X            | X     | X     |       | X     | X     |       | X     | X             |               | X             |
|                                                                | A/wild_goose/Poland/MB142/2020_H5N8_2020-12-17                    | X            | X     | X     |       | X     | X     |       | X     | X             |               | X             |
|                                                                | A/mute_swan/Poland/MB021-21_22VIR5675-11/2021_H5N8_2021-01-19     | X            | X     | X     |       | X     | X     |       | X     | X             |               | X             |
|                                                                | A/tufted_duck/Poland/MB061/2021_H5N5                              | X            | X     | X     |       | X     | X     |       | X     | X             |               | X             |
|                                                                | A/swan/Poland/MB122-21_22VIR5675-9/2021_H5N8_2021-02-18           | X            | X     | X     |       | X     | X     |       | X     | X             |               | X             |
|                                                                | A/buzzard/Poland/MB129-21_22VIR5675-7/2021_2021-02-19             | X            | X     | X     |       | X     | X     |       | X     | X             |               | X             |
|                                                                | A/mute_swan/Poland/MB131/2021_H5N8_2021-02-19                     | X            | X     | X     |       | X     | X     |       | X     | X             |               | X             |
|                                                                | A/swan/Poland/MB185/2021_H5N8_2021-02-26                          | X            | X     | X     |       | X     | X     |       | X     | X             |               | X             |
|                                                                | A/mute_swan/Poland/MB189/2021_H5N8_2021-02-26                     | X            | X     | X     |       | X     | X     |       | X     | X             |               | X             |
|                                                                | A/mute_swan/Poland/MB268/2021_H5N8_2021-03-09                     | X            | X     | X     |       | X     | X     |       | X     | X             |               | X             |
|                                                                | A/mute_swan/Poland/MB272/2021_H5N8_2021-03-09                     | X            | X     | X     |       | X     | X     |       | X     | X             |               | X             |
|                                                                | A/buzzard/Poland/MB277-21_22VIR5675-18/2021_H5N8_2021-03-09       | X            | X     | X     |       | X     | X     |       | X     | X             |               | X             |
|                                                                | A/avian/Poland/MB292-21_22VIR5675-14/2021_H5N8_2021-03-11         | X            | X     | X     |       | X     | X     |       | X     | X             |               | X             |
|                                                                | A/mute_swan/Poland/MB306-21_22VIR5675-20/2021_H5N8_2021-03-16     | X            | X     | X     |       | X     | X     |       | X     | X             |               | X             |
|                                                                | A/white_stork/Poland/MB363-21_22VIR5675-15/2021_H5N8_2021-04-01   | X            | X     | X     |       | X     | X     |       | X     | X             |               | X             |
|                                                                | A/mute_swan/Poland/MB372-21_22VIR5675-19/2021_H5N8_2021-04-07     | X            | X     | X     |       | X     | X     |       | X     | X             |               | X             |
|                                                                | A/white_stork/Poland/MB391/2021_H5N1_2021-04-20                   | X            | X     | X     |       | X     | X     |       | X     | X             |               | X             |
| A/mute_swan/Poland/MB396_21RS1385-19/2021_H5N8_2021-04-21      | X                                                                 | X            | X     |       | X     | X     |       | X     | X     |               | X             |               |
| A/white_stork/Poland/MB412_21RS1385-11/2021_H5N8_2021-05-02    | X                                                                 | X            | X     |       | X     | X     |       | X     | X     |               | X             |               |
| <b>PASSIVE SURVEILLANCE HPAI 2021/2022 (H5N1) + LPAIV H2N3</b> | A/mute_swan/Poland/MB490-L1/2021_H5N1_                            | X            | X     | X     |       | X     | X     |       | X     | X             |               | X             |
|                                                                | A/greylag_goose/Poland/MB503_21RS3290-18/2021_H5N1_2021-11-22     | X            | X     | X     |       | X     | X     |       | X     | X             |               | X             |
|                                                                | A/crane/Poland/MB528/2021_H5N1_2021-12-10                         | X            | X     | X     |       | X     | X     |       | X     | X             |               | X             |
|                                                                | A/wild_bird/Poland/MW542/2021_H5N1_2021-12-20                     | X            | X     | X     |       | X     | X     |       | X     | X             |               | X             |
|                                                                | A/hawk/Poland/MB544/2021_H5N1_2021-12-22                          | X            | X     | X     |       | X     | X     |       | X     | X             |               | X             |
|                                                                | A/mute_swan/Poland/MB550/2021_H5N1_2021-12-23                     | X            | X     | X     |       | X     | X     |       | X     | X             |               | X             |
|                                                                | A/mute_swan/Poland/MB551/2021_H5N1_2021-12-23                     | X            | X     | X     |       | X     | X     |       | X     | X             |               | X             |
|                                                                | A/mute_swan/Poland/MB008-22_22VIR5675-16/2022_2022-01-05          | X            | X     | X     |       | X     | X     |       | X     | X             |               | X             |
|                                                                | A/mute_swan/Poland/MB020-22_22VIR5675-3/2022_H5N1_2022-01-11      | X            | X     | X     |       | X     | X     | X     | X     | X             |               | X             |
|                                                                | A/white-fronted_goose/Poland/MB028-22_22VIR5675-1/2022_2022-01-14 | X            | X     | X     |       | X     | X     |       | X     | X             |               | X             |
|                                                                | A/mute_swan/Poland/MB034-22_22VIR5675-12/2022_H5N1_2022-01-18     | X            | X     | X     |       | X     | X     |       | X     | X             |               | X             |
|                                                                | A/mute_swan/Poland/MB040-22_22VIR5675-8/2022_H5N1_2022-01-20      | NA           | NA    | X     |       | NA    | NA    | NA    | X     | NA            |               | X             |
|                                                                | A/mute_swan/Poland/MB042-22_22VIR5675-6/2022_H5N1_2022-01-24      | X            | X     | X     |       | X     | X     |       | X     | X             |               | X             |
|                                                                | A/swan/Poland/MB058-22_22VIR5675-2/2022_H5N1_2022-02-03           | X            | X     | X     |       | X     | X     |       | X     | X             |               | X             |
|                                                                | A/swan/Poland/MB078_22VIR2515-7/2022_H5N1_2022-02-15              | X            | X     | X     |       | X     | X     |       | X     | X             |               | X             |
|                                                                | A/swan/Poland/MB083_22VIR2515-8/2022_H5N1_2022-02-18              | X            | X     | X     |       | X     | X     |       | X     | X             |               | X             |
|                                                                | A/mute_swan/Poland/MB122/2022_H5N1_2022-04-07                     | X            | X     | X     |       | X     | X     |       | X     | X             |               | X             |
|                                                                | A/herring_gull/Poland/MB138/2022_H5N1_2022-05-30                  | X            | X     | X     |       | X     | X     |       | X     | X             |               | X             |
|                                                                | A/black-headed_gull/Poland/MB139/2022_H5N1_2022-05-30             | X            | X     | X     |       | X     | X     |       | X     | X             |               | X             |
|                                                                | A/sandwich_stern/Poland/MB142/2022_H5N1_2022-06-15                | X            | X     | X     |       | X     | X     |       | X     | X             |               | X             |
| A/common_tern/Poland/MB143/2022_H5N1_2022-06-15                | X                                                                 | X            | X     |       | X     | X     |       | X     | X     |               | X             |               |
| A/common_mure/Poland/MB151/2022_H5N1_2022-07-13                | X                                                                 | X            | X     |       | X     | X     |       | X     | X     |               | X             |               |
| A/swan/Poland/MB152/2022_H2N3_2022-07-15                       | X                                                                 | X            | X     |       | X     | X     |       | X     | X     |               | X             |               |

NA = not applicable ("N" in the sequence)  
X = present in the sequence

|           |                                          | H3 numbering - H5 numbering [H2 numbering] |                       |                       |                       |                       |                                               |
|-----------|------------------------------------------|--------------------------------------------|-----------------------|-----------------------|-----------------------|-----------------------|-----------------------------------------------|
|           |                                          | I155T - I151T [I150T]                      | V214I - V210I [V209I] | R496K - R493K [R492K] | V186N - V182N [V181N] | K393E - K394E [K389E] | T189A + G192R - T185A + G188R [T184A + G187R] |
| <b>H2</b> | A/swan/Poland/MB152/2022_H2N3_2022-07-15 | X                                          | X                     | X                     | X                     | X                     | X                                             |

|           |                                                    | H5 numbering [H3 numbering] |                 |               |               |               |                               |               |
|-----------|----------------------------------------------------|-----------------------------|-----------------|---------------|---------------|---------------|-------------------------------|---------------|
|           |                                                    | Y7H [Y17H]                  | N11any [N21any] | I151T [I155T] | S155N [S159N] | T156A [T160A] | S155N [S159N] + T156A [T160A] | V214I [V210I] |
| <b>H3</b> | A/mallard/Poland/P074w5/2018_H3N8_2018-09-05       | X                           | X [N21P]        | X             | X             | X             | X                             | X             |
|           | A/common_teal/P079w24/2018_H3-H12-N8-N5_2018_09_14 | X                           | X [N21P]        | X             | X             | X             | X                             | X             |
|           | A/common_teal/P079w24/2018_H3-H12-N8-N5_2018_09_14 | X                           | X [N21P]        | X             | X             | X             | X                             | X             |
|           | A/mallard/Poland/P060w2/2020_H3N8_2020-08-25       | X                           | X [N21P]        | X             |               |               |                               | X             |

|           |                                                      | H5 numbering [H9 numbering] |             |                                             |             |               |               |               |               |               |               |                               |                               |
|-----------|------------------------------------------------------|-----------------------------|-------------|---------------------------------------------|-------------|---------------|---------------|---------------|---------------|---------------|---------------|-------------------------------|-------------------------------|
|           |                                                      | H8Q [H8Q]                   | E75K [E75K] | E75K + N193K + R497K [E75K + N187K + R487K] | D94N [D94N] | S133A [S131A] | I151T [I145T] | N193K [N187K] | K394E [K384E] | R493K [R487K] | Q222L [Q216L] | N154S + Q222L [N148S + Q216L] | N193K + R497K [N187K + R487K] |
| <b>H9</b> | A/mute_swan/Poland/P071/2020_H9N2_2020-09-18         | X                           | X           | X                                           | X           |               | X             | X             | X             | X             | X             | X                             | X                             |
|           | A/mallard/Poland/P096/2020_H9N2_2020-11-02           | X                           |             |                                             | X           |               | X             | X             | X             | X             |               |                               | X                             |
|           | A/black-headed_gull/Poland/P075/2021_H9N7_2021-02-09 | X                           |             |                                             | X           | X             | X             |               | X             | X             |               |                               |                               |

|            |                                                    | H5 numbering - H3 numbering [H12 numbering] |                       |                       |                       |
|------------|----------------------------------------------------|---------------------------------------------|-----------------------|-----------------------|-----------------------|
|            |                                                    | H8Q- H18Q [H9Q]                             | I155T - I151T [I151T] | T318I - T315I [T315I] | K393E - K394E [K390E] |
| <b>H12</b> | A/common_teal/P079w24/2018_H3-H12-N8-N5_2018_09_14 | X                                           | X                     | X                     | X                     |
|            | A/common_teal/P079w24/2018_H3-H12-N8-N5_2018_09_14 | X                                           | X                     | X                     | X                     |

NA = not applicable ("N" in the sequence)  
X = present in the sequence

|            |                                                  | H5 numbering - H3 numbering [H16] |  |
|------------|--------------------------------------------------|-----------------------------------|--|
|            |                                                  | G228S - G224S [G221S]             |  |
| <b>H16</b> | A/herring_gull/Poland/P092/2020_H16N3_2020-10-28 | X                                 |  |

|                                                               |                                                                   | NP   |       |       |       |
|---------------------------------------------------------------|-------------------------------------------------------------------|------|-------|-------|-------|
|                                                               |                                                                   | I41V | M105V | A184K | N319K |
| ACTIVE SURVEILLANCE<br>2018-2021 (LPAIVs)                     | A/mallard/Poland/P074w5/2018_H3N8_2018-09-05                      |      | X     | X     |       |
|                                                               | A/mallard/Poland/P077w1/2018_H5N2_2018-09-12                      |      |       | X     |       |
|                                                               | A/common_teal/P079w24/2018_H3-H12-N8-N5_2018_09_14                |      | NA    | X     |       |
|                                                               | A/common_teal/P079w24/2018_H3-H12-N8-N5_2018_09_14                |      | NA    | X     |       |
|                                                               | A/mallard/Poland/P060w2/20_H3N8_2020-08-25                        |      | X     | X     |       |
|                                                               | A/mute_swan/Poland/P071/2020_H9N2_2020-09-18                      |      | X     | X     |       |
|                                                               | A/herring_gull/Poland/P092/20_H16N3_2020-10-28                    |      | X     | X     |       |
|                                                               | A/mallard/Poland/P096/2020_H9N2_2020-11-02                        |      |       | X     |       |
| A/black-headed_gull/Poland/P075/2021_H9N7_2021-02-09          |                                                                   | X    | X     |       |       |
| PASSIVE SURVEILLANCE<br>HPAI 2020/2021 (H5N8,<br>H5N1, H5N5)  | A/tundra-bean-goose/Poland/MB132/2020_H5N8_2020-12-11             |      | X     | X     |       |
|                                                               | A/swan/Poland/MB141/2020_H5N8_2020-12-17                          |      | X     | X     |       |
|                                                               | A/wild_goose/Poland/MB142/2020_H5N8_2020-12-17                    |      | X     | X     |       |
|                                                               | A/mute_swan/Poland/MB021-21_22VIR5675-11/2021_H5N8_2021-01-19     |      | X     | X     |       |
|                                                               | A/tufted_duck/Poland/MB061/2021_H5N5_2021-02-01                   |      |       | X     |       |
|                                                               | A/swan/Poland/MB122-21_22VIR5675-9/2021_H5N8_2021-02-18           |      | X     | X     |       |
|                                                               | A/buzzard/Poland/MB129-21_22VIR5675-7/2021_2021-02-19             |      | X     | X     |       |
|                                                               | A/mute_swan/Poland/MB131/2021_H5N8_2021-02-19                     |      | X     | X     |       |
|                                                               | A/swan/Poland/MB185/2021_H5N8_2021-02-26                          |      | X     | X     |       |
|                                                               | A/mute_swan/Poland/MB189/2021_H5N8_2021-02-26                     |      | X     | X     |       |
|                                                               | A/mute_swan/Poland/MB268/2021_H5N8_2021-03-09                     |      | X     | X     |       |
|                                                               | A/mute_swan/Poland/MB272/2021_H5N8_2021-03-09                     |      | X     | X     |       |
|                                                               | A/buzzard/Poland/MB277-21_22VIR5675-18/2021_H5N8_2021-03-09       |      | X     | X     |       |
|                                                               | A/avian/Poland/MB292-21_22VIR5675-14/2021_H5N8_2021-03-11         |      | X     | X     |       |
|                                                               | A/mute_swan/Poland/MB306-21_22VIR5675-20/2021_H5N8_2021-03-16     |      | X     | X     |       |
|                                                               | A/white_stork/Poland/MB363-21_22VIR5675-15/2021_H5N8_2021-04-01   |      | X     | X     |       |
|                                                               | A/mute_swan/Poland/MB372-21_22VIR5675-19/2021_H5N8_2021-04-07     |      | X     | X     |       |
|                                                               | A/white_stork/Poland/MB391/2021_H5N1_2021-04-20                   |      | X     | X     |       |
| A/mute_swan/Poland/MB396_21RS1385-19/2021_H5N8_2021-04-21     |                                                                   | X    | X     |       |       |
| A/white_stork/Poland/MB412_21RS1385-11/2021_H5N8_2021-05-02   |                                                                   | X    | X     |       |       |
| PASSIVE SURVEILLANCE<br>HPAI 2021/2022 (H5N1) +<br>LPAIV H2N3 | A/mute_swan/Poland/MB490-L1/2021_H5N1_2021-11-08                  |      | X     | X     |       |
|                                                               | A/greylag_goose/Poland/MB503_21RS3290-18/2021_H5N1_2021-11-22     |      | X     | X     |       |
|                                                               | A/crane/Poland/MB528/2021_H5N1_2021-12-10                         |      | X     | X     |       |
|                                                               | A/wild_bird/Poland/MW542/2021_H5N1_2021-12-20                     |      | X     | X     |       |
|                                                               | A/hawk/Poland/MB544/2021_H5N1_2021-12-22                          |      | X     | X     |       |
|                                                               | A/mute_swan/Poland/MB550/2021_H5N1_2021-12-23                     |      | X     | X     |       |
|                                                               | A/mute_swan/Poland/MB551/2021_H5N1_2021-12-23                     |      | X     | X     |       |
|                                                               | A/mute_swan/Poland/MB008-22_22VIR5675-16/2022_2022-01-05          |      | X     | X     |       |
|                                                               | A/mute_swan/Poland/MB020-22_22VIR5675-3/2022_H5N1_2022-01-11      |      | X     | X     |       |
|                                                               | A/white-fronted_goose/Poland/MB028-22_22VIR5675-1/2022_2022-01-14 |      |       | X     |       |
|                                                               | A/mute_swan/Poland/MB034-22_22VIR5675-12/2022_H5N1_2022-01-18     |      |       | X     |       |
|                                                               | A/mute_swan/Poland/MB040-22_22VIR5675-8/2022_H5N1_2022-01-20      |      | X     | X     |       |
|                                                               | A/mute_swan/Poland/MB042-22_22VIR5675-6/2022_H5N1_2022-01-24      |      |       | X     |       |
|                                                               | A/swan/Poland/MB058-22_22VIR5675-2/2022_H5N1_2022-02-03           |      |       | X     |       |
|                                                               | A/swan/Poland/MB078_22VIR2515-7/2022_H5N1_2022-02-15              |      |       | X     |       |
|                                                               | A/swan/Poland/MB083_22VIR2515-8/2022_H5N1_2022-02-18              |      | X     | X     |       |
|                                                               | A/mute_swan/Poland/MB122/2022_H5N1_2022-04-07                     | X    |       | X     |       |
|                                                               | A/herring_gull/Poland/MB138/2022_H5N1_2022-05-30                  |      |       | X     | X     |
|                                                               | A/black-headed_gull/Poland/MB139/2022_H5N1_2022-05-30             |      |       | X     | X     |
|                                                               | A/sandwich_stern/Poland/MB142/2022_H5N1_2022-06-15                |      |       | X     |       |
| A/common_tern/Poland/MB143/2022_H5N1_2022-06-15               |                                                                   |      | X     |       |       |
| A/common_mure/Poland/MB151/2022_H5N1_2022-07-13               |                                                                   |      | X     |       |       |
| A/swan/Poland/MB152/2022_H2N3_2022-07-15                      |                                                                   |      | X     |       |       |

NA = not applicable ("N" in the sequence)  
X = present in the sequence

|                                                               |                                                                   | N2 numbering [Nx numbering] |
|---------------------------------------------------------------|-------------------------------------------------------------------|-----------------------------|
| ACTIVE SURVEILLANCE<br>2018-2021 (LPAIVs)                     | A/mallard/Poland/P074w5/2018_H3N8_2018-09-05                      | I117T                       |
|                                                               | A/mallard/Poland/P077w1/2018_H5N2_2018-09-12                      | X [I117T]                   |
|                                                               | A/common_teal/P079w24/2018_H3-H12-N8-N5_2018_09_14                |                             |
|                                                               | A/common_teal/P079w24/2018_H3-H12-N8-N5_2018_09_14                |                             |
|                                                               | A/mallard/Poland/P060w2/2020_H3N8_2020-08-25                      |                             |
|                                                               | A/mute_swan/Poland/P071/2020_H9N2_2020-09-18                      | X [I117T]                   |
|                                                               | A/herring_gull/Poland/P092/2020_H16N3_2020-10-28                  | X [I118T]                   |
|                                                               | A/mallard/Poland/P096/2020_H9N2_2020-11-02                        | X [I117T]                   |
| A/black-headed_gull/Poland/P075/2021_H9N7_2021-02-09          | X [I116T]                                                         |                             |
| PASSIVE SURVEILLANCE<br>HPAI 2020/2021 (H5N8,<br>H5N1, H5N5)  | A/tundra-bean-goose/Poland/MB132/2020_H5N8_2020-12-11             |                             |
|                                                               | A/swan/Poland/MB141/2020_H5N8_2020-12-17                          |                             |
|                                                               | A/wild_goose/Poland/MB142/2020_H5N8_2020-12-17                    |                             |
|                                                               | A/mute_swan/Poland/MB021-21_22VIR5675-11/2021_H5N8_2021-01-19     |                             |
|                                                               | A/tufted_duck/Poland/MB061/2021_H5N5_2021-02-01                   |                             |
|                                                               | A/swan/Poland/MB122-21_22VIR5675-9/2021_H5N8_2021-02-18           |                             |
|                                                               | A/buzzard/Poland/MB129-21_22VIR5675-7/2021_2021-02-19             |                             |
|                                                               | A/mute_swan/Poland/MB131/2021_H5N8_2021-02-19                     |                             |
|                                                               | A/swan/Poland/MB185/2021_H5N8_2021-02-26                          |                             |
|                                                               | A/mute_swan/Poland/MB189/2021_H5N8_2021-02-26                     |                             |
|                                                               | A/mute_swan/Poland/MB268/2021_H5N8_2021-03-09                     |                             |
|                                                               | A/mute_swan/Poland/MB272/2021_H5N8_2021-03-09                     |                             |
|                                                               | A/buzzard/Poland/MB277-21_22VIR5675-18/2021_H5N8_2021-03-09       |                             |
|                                                               | A/avian/Poland/MB292-21_22VIR5675-14/2021_H5N8_2021-03-11         |                             |
|                                                               | A/mute_swan/Poland/MB306-21_22VIR5675-20/2021_H5N8_2021-03-16     |                             |
|                                                               | A/white_stork/Poland/MB363-21_22VIR5675-15/2021_H5N8_2021-04-01   |                             |
|                                                               | A/mute_swan/Poland/MB372-21_22VIR5675-19/2021_H5N8_2021-04-07     |                             |
| A/white_stork/Poland/MB391/2021_H5N1_2021-04-20               |                                                                   |                             |
| A/mute_swan/Poland/MB396_21RS1385-19/2021_H5N8_2021-04-21     |                                                                   |                             |
| A/white_stork/Poland/MB412_21RS1385-11/2021_H5N8_2021-05-02   |                                                                   |                             |
| PASSIVE SURVEILLANCE<br>HPAI 2021/2022 (H5N1) +<br>LPAIV H2N3 | A/mute_swan/Poland/MB490-L1/2021_H5N1_2021-11-08                  |                             |
|                                                               | A/greylag_goose/Poland/MB503_21RS3290-18/2021_H5N1_2021-11-22     |                             |
|                                                               | A/crane/Poland/MB528/2021_H5N1_2021-12-10                         |                             |
|                                                               | A/wild_bird/Poland/MW542/2021_H5N1_2021-12-20                     |                             |
|                                                               | A/hawk/Poland/MB544/2021_H5N1_2021-12-22                          |                             |
|                                                               | A/mute_swan/Poland/MB550/2021_H5N1_2021-12-23                     |                             |
|                                                               | A/mute_swan/Poland/MB551/2021_H5N1_2021-12-23                     |                             |
|                                                               | A/mute_swan/Poland/MB008-22_22VIR5675-16/2022_2022-01-05          |                             |
|                                                               | A/mute_swan/Poland/MB020-22_22VIR5675-3/2022_H5N1_2022-01-11      |                             |
|                                                               | A/white-fronted_goose/Poland/MB028-22_22VIR5675-1/2022_2022-01-14 |                             |
|                                                               | A/mute_swan/Poland/MB034-22_22VIR5675-12/2022_H5N1_2022-01-18     |                             |
|                                                               | A/mute_swan/Poland/MB040-22_22VIR5675-8/2022_H5N1_2022-01-20      |                             |
|                                                               | A/mute_swan/Poland/MB042-22_22VIR5675-6/2022_H5N1_2022-01-24      |                             |
|                                                               | A/swan/Poland/MB058-22_22VIR5675-2/2022_H5N1_2022-02-03           |                             |
|                                                               | A/swan/Poland/MB078_22VIR2515-7/2022_H5N1_2022-02-15              |                             |
|                                                               | A/swan/Poland/MB083_22VIR2515-8/2022_H5N1_2022-02-18              |                             |
|                                                               | A/mute_swan/Poland/MB122/2022_H5N1_2022-04-07                     |                             |
|                                                               | A/herring_gull/Poland/MB138/2022_H5N1_2022-05-30                  |                             |
|                                                               | A/black-headed_gull/Poland/MB139/2022_H5N1_2022-05-30             |                             |
|                                                               | A/sandwich_stern/Poland/MB142/2022_H5N1_2022-06-15                |                             |
| A/common_tern/Poland/MB143/2022_H5N1_2022-06-15               |                                                                   |                             |
| A/common_murre/Poland/MB151/2022_H5N1_2022-07-13              |                                                                   |                             |
| A/swan/Poland/MB152/2022_H2N3_2022-07-15                      | X [I118T]                                                         |                             |

NA = not applicable ("N" in the sequence)

X = present in the sequence

Nx numbering = subtype-specific numbering

|                                                             |                                                                   | M1   |      |       |
|-------------------------------------------------------------|-------------------------------------------------------------------|------|------|-------|
|                                                             |                                                                   | N30D | I43M | T215A |
| ACTIVE SURVEILLANCE 2018-2021<br>(LPAIVs)                   | A/mallard/Poland/P074w5/2018_H3N8_2018-09-05                      | X    | X    | X     |
|                                                             | A/mallard/Poland/P077w1/2018_H5N2_2018-09-12                      | X    | X    | X     |
|                                                             | A/common_teal/P079w24/2018_H3-H12-N8-N5_2018_09_14                | X    | X    | X     |
|                                                             | A/common_teal/P079w24/2018_H3-H12-N8-N5_2018_09_14                | X    | X    | X     |
|                                                             | A/mallard/Poland/P060w2/20_H3N8_2020-08-25                        | X    | X    | X     |
|                                                             | A/mute_swan/Poland/P071/2020_H9N2_2020-09-18                      | X    | X    | X     |
|                                                             | A/herring_gull/Poland/P092/20_H16N3_2020-10-28                    | X    | X    | X     |
|                                                             | A/mallard/Poland/P096/2020_H9N2_2020-11-02                        | X    | X    | X     |
| A/black-headed_gull/Poland/P075/2021_H9N7_2021-02-09        | X                                                                 | X    | X    |       |
| PASSIVE SURVEILLANCE HPAI 2020/2021<br>(H5N8, H5N1, H5N5)   | A/tundra-bean-goose/Poland/MB132/2020_H5N8_2020-12-11             | X    | X    | X     |
|                                                             | A/swan/Poland/MB141/2020_H5N8_2020-12-17                          | X    | X    | X     |
|                                                             | A/wild_goose/Poland/MB142/2020_H5N8_2020-12-17                    | X    | X    | X     |
|                                                             | A/mute_swan/Poland/MB021-21_22VIR5675-11/2021_H5N8_2021-01-19     | X    | X    | X     |
|                                                             | A/tufted_duck/Poland/MB061/2021_H5N5_2021-02-01                   | X    | X    | X     |
|                                                             | A/swan/Poland/MB122-21_22VIR5675-9/2021_H5N8_2021-02-18           | X    | X    | X     |
|                                                             | A/buzzard/Poland/MB129-21_22VIR5675-7/2021_2021-02-19             | X    | X    | X     |
|                                                             | A/mute_swan/Poland/MB131/2021_H5N8_2021-02-19                     | X    | X    | X     |
|                                                             | A/swan/Poland/MB185/2021_H5N8_2021-02-26                          | X    | X    | X     |
|                                                             | A/mute_swan/Poland/MB189/2021_H5N8_2021-02-26                     | X    | X    | X     |
|                                                             | A/mute_swan/Poland/MB268/2021_H5N8_2021-03-09                     | X    | X    | X     |
|                                                             | A/mute_swan/Poland/MB272/2021_H5N8_2021-03-09                     | X    | X    | X     |
|                                                             | A/buzzard/Poland/MB277-21_22VIR5675-18/2021_H5N8_2021-03-09       | X    | X    | X     |
|                                                             | A/avian/Poland/MB292-21_22VIR5675-14/2021_H5N8_2021-03-11         | X    | X    | X     |
|                                                             | A/mute_swan/Poland/MB306-21_22VIR5675-20/2021_H5N8_2021-03-16     | X    | X    | X     |
|                                                             | A/white_stork/Poland/MB363-21_22VIR5675-15/2021_H5N8_2021-04-01   | X    | X    | X     |
|                                                             | A/mute_swan/Poland/MB372-21_22VIR5675-19/2021_H5N8_2021-04-07     | X    | X    | X     |
|                                                             | A/white_stork/Poland/MB391/2021_H5N1_2021-04-20                   | X    | X    | X     |
| A/mute_swan/Poland/MB396_21RS1385-19/2021_H5N8_2021-04-21   | X                                                                 | X    | X    |       |
| A/white_stork/Poland/MB412_21RS1385-11/2021_H5N8_2021-05-02 | X                                                                 | X    | X    |       |
| PASSIVE SURVEILLANCE HPAI 2021/2022<br>(H5N1) + LPAIV H2N3  | A/mute_swan/Poland/MB490-L1/2021_H5N1_2021-11-08                  | X    | X    | X     |
|                                                             | A/greylag_goose/Poland/MB503_21RS3290-18/2021_H5N1_2021-11-22     | X    | X    | X     |
|                                                             | A/crane/Poland/MB528/2021_H5N1_2021-12-10                         | X    | X    | X     |
|                                                             | A/wild_bird/Poland/MW542/2021_H5N1_2021-12-20                     | X    | X    | X     |
|                                                             | A/hawk/Poland/MB544/2021_H5N1_2021-12-22                          | X    | X    | X     |
|                                                             | A/mute_swan/Poland/MB550/2021_H5N1_2021-12-23                     | X    | X    | X     |
|                                                             | A/mute_swan/Poland/MB551/2021_H5N1_2021-12-23                     | X    | X    | X     |
|                                                             | A/mute_swan/Poland/MB008-22_22VIR5675-16/2022_2022-01-05          | X    | X    | X     |
|                                                             | A/mute_swan/Poland/MB020-22_22VIR5675-3/2022_H5N1_2022-01-11      | X    | X    | X     |
|                                                             | A/white-fronted_goose/Poland/MB028-22_22VIR5675-1/2022_2022-01-14 | X    | X    | X     |
|                                                             | A/mute_swan/Poland/MB034-22_22VIR5675-12/2022_H5N1_2022-01-18     | X    | X    | X     |
|                                                             | A/mute_swan/Poland/MB040-22_22VIR5675-8/2022_H5N1_2022-01-20      | X    | X    | X     |
|                                                             | A/mute_swan/Poland/MB042-22_22VIR5675-6/2022_H5N1_2022-01-24      | X    | X    | X     |
|                                                             | A/swan/Poland/MB058-22_22VIR5675-2/2022_H5N1_2022-02-03           | X    | X    | X     |
|                                                             | A/swan/Poland/MB078_22VIR2515-7/2022_H5N1_2022-02-15              | X    | X    | X     |
|                                                             | A/swan/Poland/MB083_22VIR2515-8/2022_H5N1_2022-02-18              | X    | X    | X     |
|                                                             | A/mute_swan/Poland/MB122/2022_H5N1_2022-04-07                     | X    | X    | X     |
|                                                             | A/herring_gull/Poland/MB138/2022_H5N1_2022-05-30                  | X    | X    | X     |
|                                                             | A/black-headed_gull/Poland/MB139/2022_H5N1_2022-05-30             | X    | X    | X     |
|                                                             | A/sandwich_stern/Poland/MB142/2022_H5N1_2022-06-15                | X    | X    | X     |
|                                                             | A/common_tern/Poland/MB143/2022_H5N1_2022-06-15                   | X    | X    | X     |
|                                                             | A/common_mure/Poland/MB151/2022_H5N1_2022-07-13                   | X    | X    | X     |
| A/swan/Poland/MB152/2022_H2N3_2022-07-15                    | X                                                                 | X    | X    |       |

NA = not applicable ("N" in the sequence)

X = present in the sequence

no mutations in M2 segment gene detected



|                                                               |                                                                   | NS1  |       |       |       |               |                     |                        |               |
|---------------------------------------------------------------|-------------------------------------------------------------------|------|-------|-------|-------|---------------|---------------------|------------------------|---------------|
|                                                               |                                                                   | P42S | I106M | C138F | V149A | L103F + I106M | K55E + K66E + C138F | ESEV motif (227-230aa) | truncated NS1 |
| ACTIVE SURVEILLANCE<br>2018-2021 (LPAIVs)                     | A/mallard/Poland/P074w5/2018_H3N8_2018-09-05                      |      | X     | X     | X     |               |                     | X                      |               |
|                                                               | A/mallard/Poland/P077w1/2018_H5N2_2018-09-12                      | X    | X     | X     | X     | X             | X                   | X                      |               |
|                                                               | A/common_teal/P079w24/2018_H3-H12-N8-N5_2018_09_14                | NA   | NA    | NA    | NA    | NA            | NA                  | NA                     | NA            |
|                                                               | A/common_teal/P079w24/2018_H3-H12-N8-N5_2018_09_14                | NA   | NA    | NA    | NA    | NA            | NA                  | NA                     | NA            |
|                                                               | A/mallard/Poland/P060w2/20_H3N8_2020-08-25                        | X    | X     | X     | X     | X             | X                   | X                      |               |
|                                                               | A/mute_swan/Poland/P071/2020_H9N2_2020-09-18                      | X    | X     | X     | X     | X             | X                   | X                      |               |
|                                                               | A/herring_gull/Poland/P092/20_H16N3_2020-10-28                    | X    | X     | X     | X     | X             | X                   | X                      |               |
|                                                               | A/mallard/Poland/P096/2020_H9N2_2020-11-02                        |      | X     | X     | X     |               |                     | X                      |               |
| A/black-headed_gull/Poland/P075/2021_H9N7_2021-02-09          | X                                                                 | X    | X     | X     | X     | X             | X                   |                        |               |
| PASSIVE SURVEILLANCE<br>HPAI 2020/2021 (H5N8,<br>H5N1, H5N5)  | A/tundra-bean-geese/Poland/MB132/2020_H5N8_2020-12-11             | X    | X     | X     | X     | X             |                     |                        | 217 aa        |
|                                                               | A/swan/Poland/MB141/2020_H5N8_2020-12-17                          | X    | X     | X     | X     | X             |                     |                        | 217 aa        |
|                                                               | A/wild_goose/Poland/MB142/2020_H5N8_2020-12-17                    | X    | X     | X     | X     | X             |                     |                        | 217 aa        |
|                                                               | A/mute_swan/Poland/MB021-21_22VIR5675-11/2021_H5N8_2021-01-19     | X    | X     | X     | X     | X             |                     |                        | 217 aa        |
|                                                               | A/tufted_duck/Poland/MB061/2021_H5N5_2021-02-01                   | X    | X     | X     | X     | X             |                     |                        | 217 aa        |
|                                                               | A/swan/Poland/MB122-21_22VIR5675-9/2021_H5N8_2021-02-18           | X    | X     | X     | X     | X             |                     |                        | 217 aa        |
|                                                               | A/buzzard/Poland/MB129-21_22VIR5675-7/2021_2021-02-19             | X    | X     | X     | X     | X             |                     |                        | 217 aa        |
|                                                               | A/mute_swan/Poland/MB131/2021_H5N8_2021-02-19                     | X    | X     | X     | X     | X             |                     |                        | 217 aa        |
|                                                               | A/swan/Poland/MB185/2021_H5N8_2021-02-26                          | X    | X     | X     | X     | X             |                     |                        | 217 aa        |
|                                                               | A/mute_swan/Poland/MB189/2021_H5N8_2021-02-26                     | X    | X     | X     | X     | X             |                     |                        | 217 aa        |
|                                                               | A/mute_swan/Poland/MB268/2021_H5N8_2021-03-09                     | X    | X     | X     | X     | X             |                     |                        | 217 aa        |
|                                                               | A/mute_swan/Poland/MB272/2021_H5N8_2021-03-09                     | X    | X     | X     | X     | X             |                     |                        | 217 aa        |
|                                                               | A/buzzard/Poland/MB277-21_22VIR5675-18/2021_H5N8_2021-03-09       | X    | X     | X     | X     | X             |                     |                        | 217 aa        |
|                                                               | A/avian/Poland/MB292-21_22VIR5675-14/2021_H5N8_2021-03-11         | X    | X     | X     | X     | X             |                     |                        | 217 aa        |
|                                                               | A/mute_swan/Poland/MB306-21_22VIR5675-20/2021_H5N8_2021-03-16     | X    | X     | X     | X     | X             |                     |                        | 217 aa        |
|                                                               | A/white_stork/Poland/MB363-21_22VIR5675-15/2021_H5N8_2021-04-01   | X    | X     | X     | X     | X             |                     |                        | 217 aa        |
|                                                               | A/mute_swan/Poland/MB372-21_22VIR5675-19/2021_H5N8_2021-04-07     | X    | X     | X     | X     | X             |                     |                        | 217 aa        |
|                                                               | A/white_stork/Poland/MB391/2021_H5N1_2021-04-20                   | X    | X     | X     | X     | X             | X                   | X                      |               |
| A/mute_swan/Poland/MB396_21RS1385-19/2021_H5N8_2021-04-21     | X                                                                 | X    | X     | X     | X     |               |                     | 217 aa                 |               |
| A/white_stork/Poland/MB412_21RS1385-11/2021_H5N8_2021-05-02   | X                                                                 | X    | X     | X     | X     |               |                     | 217 aa                 |               |
| PASSIVE SURVEILLANCE<br>HPAI 2021/2022 (H5N1) +<br>LPAIV H2N3 | A/mute_swan/Poland/MB490-L1/2021_H5N1_2021-11-08                  | X    | X     | X     | X     | X             | X                   | X                      |               |
|                                                               | A/greylag_goose/Poland/MB503_21RS3290-18/2021_H5N1_2021-11-22     | X    | X     | X     | X     | X             | X                   | X                      |               |
|                                                               | A/crane/Poland/MB528/2021_H5N1_2021-12-10                         | X    | X     | X     | X     | X             | X                   | X                      |               |
|                                                               | A/wild_bird/Poland/MW542/2021_H5N1_2021-12-20                     | X    | X     | X     | X     | X             | X                   | X                      |               |
|                                                               | A/hawk/Poland/MB544/2021_H5N1_2021-12-22                          | X    | X     | X     | X     | X             | X                   | X                      |               |
|                                                               | A/mute_swan/Poland/MB550/2021_H5N1_2021-12-23                     | X    | X     | X     | X     | X             | X                   | X                      |               |
|                                                               | A/mute_swan/Poland/MB551/2021_H5N1_2021-12-23                     | X    | X     | X     | X     | X             | X                   | X                      |               |
|                                                               | A/mute_swan/Poland/MB008-22_22VIR5675-16/2022_2022-01-05          | X    | X     | X     | X     | X             | X                   | X                      |               |
|                                                               | A/mute_swan/Poland/MB020-22_22VIR5675-3/2022_H5N1_2022-01-11      | X    | X     | X     | X     | X             | X                   | X                      |               |
|                                                               | A/white-fronted_goose/Poland/MB028-22_22VIR5675-1/2022_2022-01-14 | X    | X     | X     | X     | X             | X                   | X                      |               |
|                                                               | A/mute_swan/Poland/MB034-22_22VIR5675-12/2022_H5N1_2022-01-18     | X    | X     | X     | X     | X             | X                   | X                      |               |
|                                                               | A/mute_swan/Poland/MB040-22_22VIR5675-8/2022_H5N1_2022-01-20      | X    | X     | X     | X     | X             | X                   | X                      |               |
|                                                               | A/mute_swan/Poland/MB042-22_22VIR5675-6/2022_H5N1_2022-01-24      | X    | X     | X     | X     | X             | X                   | X                      |               |
|                                                               | A/swan/Poland/MB058-22_22VIR5675-2/2022_H5N1_2022-02-03           | X    | X     | X     | X     | X             | X                   | X                      |               |
|                                                               | A/swan/Poland/MB078_22VIR2515-7/2022_H5N1_2022-02-15              |      | X     | X     | X     |               |                     |                        | 224 aa*       |
|                                                               | A/swan/Poland/MB083_22VIR2515-8/2022_H5N1_2022-02-18              | X    | X     | X     | X     | X             | X                   | X                      |               |
|                                                               | A/mute_swan/Poland/MB122/2022_H5N1_2022-04-07                     | X    | X     | X     | X     | X             | X                   | X                      |               |
|                                                               | A/herring_gull/Poland/MB138/2022_H5N1_2022-05-30                  | X    | X     | X     | X     | X             | X                   | X                      |               |
|                                                               | A/black-headed_gull/Poland/MB139/2022_H5N1_2022-05-30             | X    | X     | X     | X     | X             | X                   | X                      |               |
|                                                               | A/sandwich_stern/Poland/MB142/2022_H5N1_2022-06-15                | X    | X     | X     | X     | X             | X                   | X                      |               |
| A/common_tern/Poland/MB143/2022_H5N1_2022-06-15               | X                                                                 | X    | X     | X     | X     | X             | X                   |                        |               |
| A/common_murre/Poland/MB151/2022_H5N1_2022-07-13              | X                                                                 | X    | X     | X     | X     | X             | X                   |                        |               |
| A/swan/Poland/MB152/2022_H2N3_2022-07-15                      | X                                                                 | X    | X     | X     | X     | X             | X                   |                        |               |

NA = not applicable ("N" in the sequence)  
X = present in the sequence

no mutations in NS2 segment gene detected

\*225-230 deletion
