# Supplementary material for: Phylogenetic and Molecular Characteristics of Wild Bird-Origin Avian Influenza Viruses Circulating in Poland in 2018−2022: Reassortment, Multiple Introductions, and Wild Bird–Poultry Epidemiological Links
Source: Transbound Emerg Dis. 2024 Apr 12;2024:6661672. doi: 10.1155/2024/6661672 (PMC12017110; doi:10.1155/2024/6661672)
Supplement: Supplementary 2 — Sequence alignments. [file 6661672.f2.pdf]

|                |                                                                                                                                                                                                                                                                                                                                                                                                                                                                                                                                                                                                                                                                                                                                                                                                                                                                                                                                                                                                                                                                                                                                                                                                                                                                                                                                                                                                                                                                                                                                                                                                                                                                                                                                                                                                                                                                          |
|----------------|--------------------------------------------------------------------------------------------------------------------------------------------------------------------------------------------------------------------------------------------------------------------------------------------------------------------------------------------------------------------------------------------------------------------------------------------------------------------------------------------------------------------------------------------------------------------------------------------------------------------------------------------------------------------------------------------------------------------------------------------------------------------------------------------------------------------------------------------------------------------------------------------------------------------------------------------------------------------------------------------------------------------------------------------------------------------------------------------------------------------------------------------------------------------------------------------------------------------------------------------------------------------------------------------------------------------------------------------------------------------------------------------------------------------------------------------------------------------------------------------------------------------------------------------------------------------------------------------------------------------------------------------------------------------------------------------------------------------------------------------------------------------------------------------------------------------------------------------------------------------------|
| EPI_ISL_122034 | >A/northern_shoveler/Georgia/1/2010_H2N3_2010-01-01<br>ATGGCAATCATTATCTGATTCTTCTGTTTACAGTAGTGAGAGGAGACCAGATATGCATTGGATACCACTCCAACAATTCACAGAAAAGGTCGACACAATTCTAGAGAGGAATGTCACCTGTGACTCATGCTCAGGACATTCTTGAGAAGACTCACAATGGAAAATTATGCAAACTAAATGGAATCCCTCCACTTGAATTGGGAGATTGCAGCATCGCCGGATGGCTCCTTGG<br>AAATCCAGAATGTGATAGACTTCTAACTGTACCAGAATGGTCATATATAATGGAGAAAAGAAAACCCAAGGAATGGTTTTGTGCTATCCAGGCAAGTTTCAATGACTATGAAGAATTGAAACACCTCCTTAGCAGTGTAAACACACTTCGAGAAAAGTGAAGATTTTGCCCAAAGATAGGTGGACACAGCATACAACAATGGAGGTTACAGGGCCTGCGCAGTATCTGGTAATCC<br>GTCAATTCCTCAGAAACATGGTCTGGTTGACAAAGAAAGGGTCAAATTATCCAGTTGCCAAAGGATCATACAATAATACAAGTGGGGAACAAATGCTGGTCATTTGGGGAGTACATCACCCCAATGATGAAGCTGAACAAAGGGCATTGTATCAGAAATGTCGGGACCTATGTATCAGTGGGAACATCGACACTTAACAAAAGATCAGTTCAGAAATAGCCACAAGACCTAA<br>AGTGAATGGACAAGGAGGCAGAATGGAATCTCATGGACCATTGGACATGTTGGACACCATAAATTCGAGAGCACTGGTAATCTAATTGCACCGGAATATGGCTTTAAAAATATCCAACGAGGTAGTTTCAGGAATCATGAAAACGGAAGGGACACTTGAAAATTGCGAAACTAAATGCCAAACTCCCTTAGGAGCAATAAATACAAACTTGCCTTTTCATAATATCCAC<br>CCATTAACCAATTGGTGAAGTCCCCAAATATGTAATAATCGGAGAGGTTAGTCTTGGCAACAGGATTAAGAAATGTCCCTCAGATTGGAATCGAGAGGATTGTTGGGGCAATAGCTGGTTTCATAGAAGGAGGATGGCAAGGAATGGTTGATGGTTGGTATGGAATCATCACAGTAATGATCAAGGATCCGGGTATGCAGCAGACAAGGAGTCCACTCAAAGGCAATTGA<br>TGGAAATCACCACAAAGTAAACTCAGTAATTGAGAAAAATGAACACTCAATTCGAGGCTGTTGGGAAAGAATTCAAGTAATTTGGAGAAAAGGCTGGAAAACTGAACAAAAAGATGGAAGACGGATTCCTAGATGTGTGGACATACATGCTGAGCTTCTAGTCTTAATGGAAAAATGAGAGGACACTTGACTTCATGACTCCAATGTCAAGAACCTATATGACAAAGTCAG<br>GATGCAATTTGAGGGACAATGCGAAAAGAACTAGGGAATGGATGTTTTGAATTTTATCATAAATGTGATGATGAATGCATGAACAGCGTAAAGAAATGGGACATATGATTATCCCAAGTATGAAGAGGAATCTAAACTAAACAGGAATGAAATCAAAGGAGTAAAAATTGAGCAACATGGGGGTTTATCAAATACTTGCAATTTATGCTACAGTAGCAGGCTCCCTGTCACTGGC<br>AATCATGATAGCTGGGATCTCTTTATGGATGTGCTCTAACGGGTCTCTGCAATGCAGAATCTGCATATGATTATCAGTCGTTTTATAATTA   |
| EPI_ISL_267297 | >A/mallard_duck/Netherlands/16/2014_H2N9_2014-08-29<br>ATGGCAGTCATTTACCTGATTCTTCTGTTTACAGTAGTGAGAGGAGACCAGATATGCATTGGATACCACTCCAACAATTCACAGAAAAGGTCGACACAATTCTAGAGAGGAATGTCACCTGTGACTCATGCTCAGGACATTCTTGAGAAGACTCACAATGGAAAATTATGCAAACTAAATGGAATCCCTCCACTTGAATTGGGAGATTGCAGCATCGCCGGATGGCTCCTTGG<br>AAATCCAGAATGTGATAGACTTCTGACTGTACCAGAATGGTCATATATAATGGAGAAAAGAAAACCCAAGAAATGGTTTTGTGCTACCCAGGCAAGTTTCAATGACTATGAAGAATTGAAACACCTCCTTAGTAGCGTAAACACACTTCGAGAAAAGTGAAGATTTTGCCCAAAGATAGATGGACACAGCATACAACAATGGAGGTTACAGGGCCTGCGCAGTATTTGGTAATCCG<br>TCATTCCTTCAGAAACATGCTGCTGGTTGACAAAGAAAGGGTCAAATTATCCAGTTGCTAAAGGATCATACAATAATACGAGTGGGGAACAAATGCTGTCATTTGGGGAGTACATCACCCCAATGATGAAAATGAGCAAGGAATTTGTACCAGAATGTCGGGACCTATGTATCAGTGGGAACATCGACACTTAACAAAAGATCAATTCAGAAATAGCCACAAGACCTAAA<br>GTGAATGGACAAGGAGGCAGAATGGAATTCATGGACCATATTGGACATGTTGGACACCATAAATTCGAGAGCACTGGTAATCTAATTGCACCGGAATATGGCTTTAAAATATCCAACGGGGTAGTTCAGGAATCATGAAAACGGAAGGGACACTTGAAAACCTGCGAGACTAAATGTCAAACCTCCCTTAGGAGCAATAAATACAACATTGCCCTTTCATAATATCCACC<br>CATTAAACCAATTGGTGAGTGCCCCAAATATGTAAAATCGGAGAGGTTAGTCTTGGCAACAGGATTAAGAAATGTCCCTCAGATTGAATCAAGAGGATTGTTTGGGGCAATAGCTGGTTTCATAGAAGGAGGATGGCAAGGAATGGTTGATGGTTGGTATGGATATCATCACAGTAATGATCAAGGATCCGGGTATGCAGCAGACAAGAGTCCACTCAGAAGGCAATTGAT<br>GGAATCACCACAAAGTAAACTCCGTAATTGAGAAAAATGAACACTCAATTCGAGGCTGTTGGGAAAGAATTCAAGTAATTTGGAGAAAAGGCTGGAAAACTGAACAAAAAGATGGAAGACGGATTCTAGATGTGTGGACATACAATGCTGAGCTTCTAGTCTTAATGGAAAAATGAGAGGACACTTGACTTCCATGACTCCAATGTCAAGAACCTGTATGACAAAGTTAG<br>GATGCAATTTGAGGGACAATGCAAAAAGAACTGGGGAATGGATGTTTTGAATTTTACCATAAATGTGATGATGAGTGCAATGAACAGCGTAAAAATGGAAACATATGATTATCCCAAGTATGAGGAGGAATCTAAACTAAACAGGAATGAAATCAAAGGAGTAAAAATTGAGCAACATGGGGATTATCAGATACTTGCAATTTATGCTACAGTAGCAGGCTCCCTGTCACTGGC<br>AATCATGATAGCTGGGATCTCTTTATGGATGTGCTCTAACGGGTCTCTGCAATGCAGAATCTGCATATGATTATCAGTCGTTTTGTAATTA   |
| EPI_ISL_267194 | >A/mallard_duck/Netherlands/14/2014_H2N9_2014-08-27<br>ATGGCAGTCATTTACCTGATTCTTCTGTTTACAGTAGTGAGAGGAGACCAGATATGCATTGGATACCACTCCAACAATTCACAGAAAAGGTCGACACAATTCTAGAGAGGAATGTCACCTGTGACTCATGCTCAGGACATTCTTGAGAAGACTCACAATGGAAAATTATGCAAACTAAATGGAATCCCTCCACTTGAATTGGGAGATTGCAGCATCGCCGGATGGCTCCTTGG<br>AAATCCAGAATGTGATAGACTTCTGACTGTACCAGAATGGTCATATATAATGGAGAAAAGAAAACCCAAGAAATGGTTTTGTGCTACCCAGGCAAGTTTCAATGACTATGAAGAATTGAAACACCTCCTTAGTAGTCGTAAACACACTTCGAGAAAAGTGAAGATTTTGCCCAAAGATAGATGGACACAGCATACAACAATGGAGGTTACAGGGCCTGCGCAGTATTTGGTAATCCG<br>TCATTCCTTCAGAAACATGGTCTGGTTGACAAAGAAAGGGTCAAATTATCCAGTTGCTAAAGGATCATACAATAATACGAGTGGGGAACAAATGCTGGTCATTTGGGGAGTACATCACCCCAATGATGAAAATGAGCAAAAGGAATTTGTACCAGAATGTCGGGACCTATGTATCAGTGGGAACATCGACACTTAACAAAAGATCAATTCAGAAATAGCCACAAGACCTAAA<br>GTGAATGGACAAGGAGGCAGAATGGAATTCATGGACCATATTGGACATGTTTGACACCATAAATTCGAGAGCACTGGTAATCTAATTGCACCGGAATATGGCTTTAAAATATCCAACGGGGTAGTTCAGGAATCATGAAAACGGAAGGGACACTTGAAAATTGCGAGACTAAATGTCAAACCTCCCTTAGGAGCAATAAATACAACACTGCCCTTTCATAATATCCACC<br>CATTAAACCAATTGGTGAGTGCCCCAAATATGTAAAATCGGAGAGGTTAGTCTTGGCAACAGGATTAAGAAATGTCCCTCAGATTGAATCAAGAGGATTGTTTGGGGCAATAGCTGGTTTCATAGAAGGAGGATGGCAAGGAATGGTTGATGGTTGGTATGGATATCATCACAGTAATGATCAAGGATCCGGGTATGCAGCAGACAAGAGTCCACTCAGAAGGCAATTGAT<br>GGAATCACCACAAAGTAAACTCCGTAATTGAGAAAAATGAACACTCAATTCGAGGCTGTTGGGAAAGAATTCAAGTAATTTGGAGAAAAGGCTGGAAAACTGAACAAAAAGATGGAAGACGGATTCTAGATGTGTGGACATACAATGCTGAGCTTCTAGTCTTAATGGAAAAATGAGAGGACACTTGACTTCCATGACTCCAATGTCAAGAACCTGTATGACAAAGTTAG<br>GATGCAATTTGAGGGACAATGCAAAAAGAACTGGGGAATGGATGTTTTGAATTTTACCATAAATGTGATGATGAGTGCAATGAACAGCGTAAAAATGGAAACATATGATTATCCCAAGTATGAGGAGGAATCTAAACTAAACAGGAATGAAATCAAAGGAGTAAAAATTGAGCAACATGGGGATTATCAGATACTTGCAATTTATGCTACAGTAGCAGGCTCCCTGTCACTGGC<br>AATCATGATAGCTGGGATCTCTTTATGGATGTGCTCTAACGGGTCTCTGCAATGCAGAATCTGCATATGATTATCAGTCGTTTTGTAATTA |



















































|                  |                                                                                                                                                                                                                                                                                                                                                                                                                                                                                                                                                                                                                                                                                                                                                                                                                                                                                                                                                                                                                                                                                                                                                                                                                                                                                                                                                                                                                                                                                                                                                                                                                                                                                                                                                                                                                                                                                               |
|------------------|-----------------------------------------------------------------------------------------------------------------------------------------------------------------------------------------------------------------------------------------------------------------------------------------------------------------------------------------------------------------------------------------------------------------------------------------------------------------------------------------------------------------------------------------------------------------------------------------------------------------------------------------------------------------------------------------------------------------------------------------------------------------------------------------------------------------------------------------------------------------------------------------------------------------------------------------------------------------------------------------------------------------------------------------------------------------------------------------------------------------------------------------------------------------------------------------------------------------------------------------------------------------------------------------------------------------------------------------------------------------------------------------------------------------------------------------------------------------------------------------------------------------------------------------------------------------------------------------------------------------------------------------------------------------------------------------------------------------------------------------------------------------------------------------------------------------------------------------------------------------------------------------------|
| EPI_ISL_3102070  | >A/white_stork/Poland/MB412_21RS1385-11/2021_H5N8_2021-05-02<br>ATGGAGAACATAGTACTTCTCTTGCAATAGTTAGCCTTGTAAAGTGATCAGATTGTGATTGGTTACCATGCAAAACAATTCGACAGAGCAAGTTGACACGATAATGGAAAAGAACGTCACCTGTTACACATGCCCAAGACATACTGGAAAAACACACACACGGGAAGCTCTGTGATCTAAATGGGGTGAAGCCTCTGATTTTAAAGGATTGTAGTGTAGCTGGATGGCTCC<br>TCGGAAACCCAATGTGCGACGAATTCATCAGAGTGC CGGAATGGTCTCTACATAGTGGAGAGGGCTAATCCAGCTAATGACCTCTGTTACCCAGGGAGCCTCAATGACTATGAGGAACGTGAAACACCTGTTGAGCAGAAATAATCATTITTTGAGAAGATTCTGATCATCCCCAAGAGTTCTTGGCCAAATCATGAAACATCACTAGGGGTGAGCGCAGCTTGTCCATACCAAGG<br>GAGCGCCCTCCTTTTTCAGAAATGTGGTGTGGCTTATCAAAAAGAACGATGCATACCCAACAAATAAGATAAGCTACAATAATACCAATCGGGAAGATCTCTTGATACTGTGGGGGATTTCATCATTTCCAACAATGCAGAAGAGCAGACAAATCTCTATAAAAAACCCAACCACCTACATTTCAGTTGGAACATCAACTTTAAACCCAGAAAGTTGGTACCAAAAATAGCTACTAG<br>ATCCCAAGTAAACGGGCAACGTGGGAGAATGGAATCTTCTGGACAATTTTAAACCGGATGATGCAATCCATTTCGAGAGTAATGGAAATTTCAATTGCTCCAGAAATGTCATACAAAAATTGTCAAGAAAGGGGACTCAACAATTATGAAAAGTGGAGTGGAAATATGGTCACTGCAACACCAAATGTCAACCCCAGTAGGAGCGATAAATCTAGTATGCCATTCCACAA<br>CATACATCCTCTCACCAATTGGGGAATGCCCAAATACGTGAAGTCAAAACAAGTTGGTCTTGCGACTGGGCTCAGAAATAGTCTCTAAGAGAAAAAGAGAAGAAAAGAGGCCCTGTTTGGGGCGATAGCAGGGTTTATAGAGGGAGGATGGCAGGGAATGGTTGATGGTTGGTATGGTATGGTACCACCATAAGCAATGAGCAGGGGAGTGGGTACGCTGCAGACAAAGAAATC<br>CACCCAAAAGGCAATAGATGGAGTTACCAATAAGGTCAACTCAATCATTTGACAAAAATGAACACTCAATTTGAGGCAGTTGGAAGGGAGTTTAAATAACTTAGAAAAGGAGGATAGAGAATTTGAACAAGAAAATGGAAAGACGGATTCCTAGATGTCTGGACCTATAATGCTGAACCTTCTAGTTCTCATGGAAAACGAGAGGACTCTAGATTTTCCATGATTCAAATGTCAAAAA<br>CCTTTACGACAAAGTCAGACTACAGCTTAGGGATAATGCAAAGGAGCTGGGTAATGGCTGTTTCGAATTCATCACAAATGCGATAATGAATGTATGGAAAAGTGTGAGAAATGGGACGTATGACTACCTCAGTATTCAGAAAGAAGCAAGATTA AAAAGAGAAGAAATAAGCGGAGTGA AATTAGAATCAATAGGAACCTTACCAGATACTGTCAATTTATTCAACAGCGG<br>CGAGTTCCTAGCGCTGGCAATCATGATGGCTGGTCTATCTTTATGGATGTGCTCCAATGGGTCGTTACAGTGCAGAAATTTGCATTTAA |
| EPI_ISL_18245742 | >A/white-fronted_goose/Poland/MB028-22_22VIR5675-1/2022_2022-01-14<br>ATGGAGAACATAGCACTTCTCTTGCAACAGTTAGCCTTGTCAAAAGTGATCAGATTGTGATTGGTTACCATGCAAAACAATTCGACAGAGCAGGTTGACACGATAATGGAAAAGAACGTCACCTGTTACACATGCCCAAGACATACTGGAAAAACACACACACGGGAAGCTCTGTGATTTAATGGGGTGAAGCCTCTGATTTTAAAGGATTGTAGTGTAGCTGGATGGCTCC<br>TCGGAAACCCAATGTGCGACGAATTCATCAGAGTGC CGGAATGGTCTTACATAGTGGAGCGGGCTAATCCAGCCAATGACCTCTGTTACCCAGGGAGCCTCAATGACTATGAAGAACTGAAACACCTGTTGAGCAGAAATAATCATTITTTGAGAAGATTCTGATCATCCCCAAGAGTTCTTGGCCAAATCATGAAACATCACTAGGGGTGAGCGCAGCTTGTCCATACCAAGG<br>GAGCGCCCTCCTTTTTCAGAAATGTGGTGTGGCTTATCAAAAAGAACGATGCATACCCAACAAATAAGATAAGCTACAATAATACCAATCGGGAAGATCTCTTGATACTGTGGGGGATTTCATCATTTCCAACAATGCAGAAGAGCAGACAAATCTCTATAAAAAACCCAACCACCTATATTTAGTTGGAACATCAACTTTAAACCCAGAGGTTGGTACCAAAAATAGCTACTAG<br>AACCCAAAGTAAACGGGCAACGTGGAGAATGGACTTCTCTGGACAATTTTAAACCCAGATGATGCAATCCATTTCGAGAGTAATGGAAATTTCAATTGCACCAGAAATATGCATATAAAATTGTCAAGAAAGGGGACTCAACAATTATGAAAAGTGGAGTGGAAATATGGCCACTGCAACACCAAATGTCAACCCCAGTAGGAGCGATAAATCTAGTATGCCATTCCACAA<br>CATACATCCTCTCACCAATTGGGGAATGCCCAAATACGTGAAGTCAAAACAAGTTGGTCTTGCGACTGGGCTCAGAAATAGTCTCTAAGAGAAAAAGAGAAGAAAAGAGGCCCTGTTTGGGGCGATAGCAGGGTTTATAGAGGGAGGATGGCAGGGAATGGTTGATGGTTGGTATGGTACCATCATAGCAATGAGCAGGGGAGTGGGTACGCTGCAGACAAAGAAATC<br>CACCCAAAAGGCAATAGATGGAGTTACCAATAAGGTCAACTCAATCATTTGACAAAAATGAACACTCAATTTGAGGCAGTTGGAAGGGAGTTTAAATACTTAGAAAAGGAGGATAGAGAATTTGAACAAGAAAATGGAAAGACGGATTCCTAGATGTCTGGACCTATAATGCTGAACCTTCTAGTTCTCATGGAAAACGAGAGGACTCTAGATTTTCCATGATTCAAATGTCAAGAA<br>CCTTTACGACAAAGTCAGACTACAGCTTAGGGATAATGCAAAGGAGCTGGGTAATGGCTGTTTCGAATTCATCACAAATGCGATAATGAATGTATGGAAAAGTGTGAGAAATGGGACGTATGACTACCTCAGTATTCAGAAAGAAGCAAGATTA AAAAGAGAAGAAATAAGCGGAGTGA AATTAGAATCAATAGGAACCTTACCAGATACTGTCAATTTATTCAACAGCGG<br>CGAGTTCCTAGCACTGGCAATCATGATAGCTGGTCTATCTTTATGGATGTGCTCCAATGGGTCGTTACAGTGCAGAAATTTGCATTTAG    |
| EPI_ISL_18245812 | >A/wild_bird/Poland/MW542/2021_H5N1_2021-12-20<br>ATGGAGAACATAGTACTTCTCTTGCAACAGTTAGCCTTGTAAAGTGATCAGATTGTGATTGGTTACCATGCAAAACAATTCGACAGAGCAGGTTGACACAATAATGGAAAAGAACGTCACCTGTTACACATGCCCAAGACATACTGGAAAAACACACACACGGGAAGCTCTGTGATTTAATGGGGTGAAGCCTCTGATTTTAAAGGATTGTAGTGTAGCTGGATGGCTCC<br>TCGGAAACCCAATGTGCGACGAATTCATCAGAGTGC CGGAATGGTCTTACATAGTGGAGCGGGCTAATCCAGCCAATGACCTCTGTTACCCAGGGAGCCTCAATGACTATGAAGAACTGAAACACCTGTTGAGCAGAAATAATCATTITTTGAGAAGATTCTGATCATCCCCAAGAGTTCTTGGCCAAATCATGAAACATCACTAGGGGTGAGCGCAGCTTGTCCATACCAAGG<br>GAGCGCCCTCCTTTTTCAGAAATGTGGTGTGGCTTATCAAAAAGAACGATGCATACCCAACAAATAAGATAAGCTACAATAATACCAATCGGGAAGATCTCTTGATACTGTGGGGGATTTCATCATTTCCAACAATGCAGAAGAGCAGACAAATCTCTATAAAAAACCCAACCACCTACATTTCAGTTGGAACATCAACTTTAAACCCAGAGGTTGGTACCAAAAATAGCTACTAG<br>ATCCCAAGTAAACGGGCAACGTGGAGAATGGACTTCTCTGGACAATTTTAAACCCAGATGATGCAATCCATTTCGAGAGTAATGGAAATTTCAATTGCACCAGAAATATGCATATAAAATTGTCAAGAAAGGGGACTCAACAATTATGAAAAGTGGAGTGGAAATATGGCCACTGCAACACCAAATGTCAACCCCAGTAGGAGCGATAAATCTAGTATGCCATTCCACAA<br>CATACATCCTCTCACCAATTGGGGAATGCCCAAATACGTGAAGTCAAAACAAGTTGGTCTTGCGACTGGGCTCAGAAATAGTCTCTAAGAGAAAAAGAGAAGAAAAGAGGCCCTGTTTGGGGCGATAGCAGGGTTTATAGAGGGAGGATGGCAGGGAATGGTTGATGGTTGGTATGGGTACCATATAGCAATGAGCAGGGGAGTGGGTACGCTGCAGACAAAGAAATC<br>CACCCAAAAGGCAATAGATGGAGTTACCAATAAGGTCAACTCAATCATTTGACAAAAATGAACACTCAATTTGAGGCAGTTGGAAGGGAGTTTAAATACTTAGAAAAGGAGGATAGAGAATTTGAACAAGAAAATGGAAAGACGGATTCCTAGATGTCTGGACCTATAATGCTGAACCTTCTAGTTCTCATGGAAAACGAGAGGACTCTAGATTTTCCATGATTCAAATGTCAAGAA<br>CCTTTACGACAAAGTCAGACTACAGCTTAGGGATAATGCAAAGGAGCTGGGTAATGGCTGTTTCGAATTCATCACAAATGCGATAATGAATGTATGGAAAAGTGTGAGAAATGGGACGTATGACTACCTCAGTATTCAGAAAGAAGCAAGATTA AAAAGAGAAGAAATAAGCGGAGTGA AATTAGAATCAATAGGAACCTTACCAGATACTGTCAATTTATTCAACAGCGG<br>CGAGTTCCTAGCACTGGCAATCATGATAGCTGGTCTATCTTTATGGATGTGCTCCAATGGGTCGTTACAGTGCAGAAATTTGCATTTAG                          |
| EPI_ISL_846624   | >A/wild_goose/Poland/MB142/2020_H5N8_2020-12-17<br>ATGGAGAACATAGTACTTCTCTTGCAATAGTTAGCCTTGTAAAGTGATCAGATTGTGATTGGTTACCATGCAAAACAATTCGACAGAGCAAGTTGACACGATAATGGAAAAGAACGTCACCTGTTACACATGCCCAAGACATACTGGAAAAACACACACACGGGAAGCTCTGTGATCTAAATGGGGTGAAGCCTCTGATTTTAAAGGATTGTAGTGTAGCTGGATGGCTCC<br>TCGGAAACCCAATGTGCGACGAATTCATCAGAGTGC CGGAATGGTCTTACATAGTGGAGAGGGCTAATCCAGCTAATGACCTCTGTTACCCAGGGGCTCAATGACTATGAAGAACTGAAACACCTGTTGAGCAGAAATAATCATTITTTGAGAAGATTCTGATCATCCCCAAGAGTTCTTGGCCAAATCATGAAACATCACTAGGGGTGAGCGCAGCTTGTCCATACCAAGG<br>GAGCGCCCTCCTTTTTCAGAAATGTGGTGTGGCTTATCAAAAAGAACGATGCATACCCAACAAATAAGATAAGCTACAATAATACCAATCGGGAAGATCTCTTGATACTGTGGGGGATTTCATCATTTCCAACAATGCAGAAGAGCAGACAAATCTCTATAAAAAACCCAACCACCTACATTTCAGTTGGAACATCAACTTTAAACCCAGAGGTTGGTACCAAAAATAGCTACTAG<br>ATCCCAAGTAAACGGGCAACGTGGGAGAATGGACTTCTCTGGACAATTTTAAACCCGATGATGCAATCCATTTCGAGAGTAATGGAAATTTCAATTGCTCCAGAAATATGCATACAAAATTGTCAAGAAAGGGGACTCAACAATTATGAAAAGTGGAGTGGAAATATGGCCACTGCAACACCAAATGTCAACCCCAGTAGGAGCGATAAATCTAGTATGCCATTCCACAA<br>CATACATCCTCTCACCAATTGGGGAATGCCCAAATACGTGAAGTCAAAACAAGTTGGTCTTGCGACTGGGCTCAGAAATAGTCTCTAAGAGAAAAAGAGAAGAAAAGAGGCCCTGTTTGGGGCGATAGCAGGGTTTATAGAGGGAGGATGGCAGGGAATGGTTGATGGTTGGTATGGGTACCACATAGCAATGAGCAGGGGAGTGGGTACGCTGCAGACAAAGAAATC<br>CACCCAAAAGGCAATAGATGGAGTTACCAATAAGGTCAACTCAATCATTTGACAAAAATGAACACTCAATTTGAGGCAGTTGGAAGGGAGTTTAAATACTTAGAAAAGGAGGATAGAGAATTTGAACAAGAAAATGGAAAGACGGATTCCTAGATGTCTGGACCTATAATGCTGAACCTTCTAGTTCTCATGGAAAACGAGAGGACTCTAGATTTTCCATGATTCAAATGTCAAAAA<br>CCTTTACGACAAAGTCAGACTACAGCTTAGGGATAATGCAAAGGAGCTGGGTAACGGCTGTTTCGAATTCATCACAAATGCGATAATGAATGTATGGAAAAGTGTGAGAAATGGGACGTATGACTACCTCAGTATTCAGAAAGAAGCAAGATTA AAAAGAGAAGAAATAAGCGGAGTGA AATTAGAATCAATAGGAACCTTACCAGATACTGTCAATTTATTCAACAGCGG<br>CGAGTTCCTAGCACTGGCAATCATGATGGCTGGTCTATCTTTATGGATGTGCTCCAATGGGTCGTTACAGTGCAGAAATTTGCATTTAA                          |





|                  |                                                                                                                                                                                                                                                                                                                                                                                                                                                                                                                                                                                                                                                                                                                                                                                                                                                                                                                                                                                                                                                                                                                                                                                                                                                                                                                                                                                                                                                                                                                                                                                                                                                                                                                                                                                                   |
|------------------|---------------------------------------------------------------------------------------------------------------------------------------------------------------------------------------------------------------------------------------------------------------------------------------------------------------------------------------------------------------------------------------------------------------------------------------------------------------------------------------------------------------------------------------------------------------------------------------------------------------------------------------------------------------------------------------------------------------------------------------------------------------------------------------------------------------------------------------------------------------------------------------------------------------------------------------------------------------------------------------------------------------------------------------------------------------------------------------------------------------------------------------------------------------------------------------------------------------------------------------------------------------------------------------------------------------------------------------------------------------------------------------------------------------------------------------------------------------------------------------------------------------------------------------------------------------------------------------------------------------------------------------------------------------------------------------------------------------------------------------------------------------------------------------------------|
| EPI_ISL_17978951 | >A/mallard/Poland/P096/2020_H9N2_2020-11-02<br>ATGGAATAATAGCACTAATAGTTATACTACTAGTAACAACAACGAGCAATGCAGATAAAATCTGCATTGGCTACCACTCAACAACTCCACAGAAACTGTCGACACACTAATAGAAAACAATGTTCTCTGTGACGCATACCAAGAATTGCTCCACACAGAGCACAATGGAATGCTATGTGCAACAGACCTGGGGCATCCTCTCATACTCGACACCTGCACTATTGAAGGACTGGTATACGGCAATCCCTCTTGATCTGCTGCTGGGAGGGAAGGAATGGTCTTACATTGTCGAAAGATCATCAGCAACCAATGGGATGTGTTATCCTGGAAATGTAGAAAACCTGGAGGAACTCAGGTCTTTTTCAGCTCTGCTAATTCTACCAAGAATCCAGATCTTTCCAGATACAATTGGAAATGTACTTACAGTGGAAACAAGCAAAGCATGTTCAAAATTCATTCTACAGGAGTATGAGATGGCTGACACACAARGCAATTCATTCCAGTTCAGACGCTCAATATACCAACAATGAGGGGAAGAATATTCTCTTCATGTGGGGCATACATCACCCACCTACTGATACTGAGCAGACAAATTTATACAAAAGGCTGACACCACAACAAGCGTGACAACAGAAGACATCAATCGAACTTCAAAACCAGTGATAGGGCCAAGGCCTCTTGTC AATGGCCAGCAAGGGAGAATTGATTACTATTGGTCAGTACTAAAGCCAGGACAAACACTGCGGATAAAGTCCAATGGGAATTTAATTGCTCCATGGTATGGACACATTCITTCAGGAGAAAGCCACGGAAGAATCCTGAAAACCTGATCTGAACAGCGGCAATTGCGTAGTACAATGCCAACTGAGAAAGGCGGTTTGAACACAACCTTGCCATTCCACAATGTCAGTAAATATGCGTTTGCGAACTGCCCAATATGTTGGAGTGAAAAGTCTAAAACTGGCAGTCGGCTTGAGGAATGTGCTGCTGCATCAGATAGAGGGTTGTTTGTGTCCATAGCTGGATTCTATAGAAGGAGTTGGCCTGGATTAGTTGCAGGCTGGTACGGTTTTCAGCATTCAAATGACCAAGGAGTTGGAATGGCTGCAGACAGAGAATCAACTCAAGAGGCAGTCAACAAAATAACATCCAAAGTAAATAATAATAATCGACAAAATGAACAAGCAGTATGAAATCATTGATCATGAATTCAGTGAGATCGAAGCCAGACTCAATATGATAAACACAAGATTGATGACCAGATACAGGACATCTGGGCATATAATGCAGAATTGCTAGTATTGCTTGAAAATCAGAAAACACTAGATGAGCATGACGCAATGTGAATAACCTGTACAACAAAGTGAAGAGGGCA TTGGGCTCAAATGC AATAGAGGATGGAAATGGATGCTTCGAGTTATACCACAAATGTGATGATCAATGTATGGAAACGATTAGAAATGGGACTTATGACAGGCCAAAAGTACCAAGAAGAATCAAAGCTAGAAAGGCAGAAAATAGAGGGGTAAAACCTGGAGTCTGAAGGAACTTACAAGATCCTCACTATCTATTGCACTGTGCGCTCATCTCTTGCTTGCAATGGG GTTTGCTGCCCTTCTTTCTGGGCCATGTCCAATGGATCTTGCAAGTGCAACATTTGTATA               |
| EPI_ISL_17978956 | >A/black-headed_gull/Poland/P075/2021_H9N7_2021-02-09<br>ATGGAATAATAGCACTAATAGCTATACTATTATTGCCAACTGCAGGCAATGCAGACAAAATCTGCATCGGCTACCACTCAACAACTCCACAGAGACTGTTGACACACTGATAGAGAACAATGTTCTGTGACCCACACCAAGAGTTGCTCCACACAGAGCACAATGGGATGTTATGTGCAACAACCTCGGACACCTCTCATTTCTAGACAGATGCAGTATAGAAGGATTGGTCTACGGCAATCCTGAGTGTGATTTTGCTGCTAACAGGGAAAGAATGGTCATACATTGTAGAAAGACCATCAGCTGTCAATGGAAACATGCTATCCTGGAATGTAGAGAATCTGGAAGAACTCAGGTCTTTCTTCAGCTCTGCTAGTTCTCTATCGAAGGGTTCAAATTTTCCGGACAGAATTTGGAATGTGACTTACACTGGAACAAGTGCAGCATGCTCAGATACATTCTACAGGAATATGAGATGGCTAACAAAGAAGACCGATTCTATCCGATCCAAGATGCCCAATTCACCAACAATGAGGGAAAAACATTCTCTTCATGTGGGGCATACATCATCCACCCTAGTACTGAGCAGACAAATTTATATAAGAATTCTGACACCACGACAAGTGTACGACAGAAGATATAAATCGGACTTTCAAACCAGTGATAGGGCCAAGGCCCTTGTC AAAGGTCAACAGGGGAGAATTGATTACTACTGGTCAGTACTAAAACCAGSTCAGACATTGCGAGTAAGATCCAATGGGAACTTAATTGCTCCATGGTATGGACACATCCTTTCAGGGGAAAGCCATGGGAGAATCCTGAAGACCGATCTGAAAAGTGGCAACTGCATAGTACAATGTCAAACTGAGAAAGGTGGTTTGAACACAACATTACCATTCCACAATATCAGCAAATATGCAATTTCGGGAACTGCCCAAATACGTTGGGGTGAAGAGTTTAAGATTAGCAGTCGGTCTAAGGAATGTGCCTGCCACATCAGATAAGGGACTGTTTCGGTGCCATAGCTGGATTTATAGAAGGAGTTTGCCAGGACTAGTTGCAGGATGGTACGGTTTTTCAGCATTCAAATGAACAGGGAGTCGGAATGGCTGCAGACAAAAGAATCAACTCAAGAGGCAATTGACAAGATAACATCTAAAGTAAACAATATAATCGATAAAATGAACAAACAGTATGAAATCATTGATCATGAATTC AATGAGATTGGAAGCCAGACTCAATATGATCAACGACAAAATTGATGACC AATACAGGATATTGGGCATACAATGCAGAGTTACTAGTGTGCTCGAAAATCAGAAAACACTCGATGAGCATGATGCCAACGTGAATAATTTATACAATAAGGTGAAGAGAGCATTGGGTTCTAATGCCATGGAGGACGGGAATGGATGCTTTGAATTGTATCACAATGTGATGACCAATGCATGGAACAATTAGAAATGGAACTATAGTAGACAAAAGTATCAGGAAGAAGCAAAGTTAGAAAAGGCAGAAAATAGAGGGGTAAAACCTGGAGGCTGATGGTACATACAGGATTCTCACCATTTTATTCGACTGTCGCCTCATCCCTTGTGCTCGAATAGGG TTTGCTGCCCTTCTTTCTGGGCCATGTCCAATGGATCTTGCAAGTGCAACGTTTGTATA |

HA (H12)

| Isolate ID       | Sequence                                                                                                                                                            |
|------------------|---------------------------------------------------------------------------------------------------------------------------------------------------------------------|
| EPI_ISL_502613   | >A/Anas_platyrhynchos/Belgium/7828/2018_H12N5_2018-08-29<br>ATGGAGAAGTTCATTGTACTGAGTATAATCTCTAAACAACCTGGTCTTGCTTATGACAAGATTGGCATCGGCTACAGACGAATAA                   |
|                  | CTTAGGCAATCCCAAATGCGATCTTTACCTGAAATGGTAGAGAATGGTCATACATTTGTGAAAAGGCCAAGGAGATGGAAGGAATCTGCTATCCGGGATCGATAGAGAATCAAGAAGAGTTGAGATCATTTGTTCTCTTCAATCAAGAATAATGAAGAAGTGA |
| EPI_ISL_331295   | >A/teal/Chany/324/2017_H12N5_2017-09-03<br>ATGGAGAAGTTCATTGTACTGAGTATAATCTCTAAACAACCTGGTCTTGCTTACGACAAGATTGGCATCGGCTACAGACGAATAA                                    |
|                  | TCTTAGGCAATCCCAAATGCGATCTTTACCTGAATGGTAGAGAATGGTCATACATTTGTGGAGAGGCCAAGGAGATGGAAGGAATCTGCTATCCAGGATCGATAGAGAATCAAGAAGAGTTGAGA                                       |
| EPI_ISL_337571   | >A/shoveler/Novosibirsk_region/999k/2018_H12N5_2018-10-01<br>ATGGAGAAGTTCATTGTACTGAGTATAATCTCTAAACAACCTGGTCTTGCTTATGACAAGATTGGCATCGGCTACAGACGAATAA                  |
|                  | TCTAGGCAATCCCAAATGCGATCTTTACCTGAAATGGTAGAGAATGGTCATACATTTGTGAAAAGGCCAAGGAGATGGAAGGAATCTGCTATCCAGGATCAATAGAGAATCAAGAAGAGTTGAGATCATTTGTTCTCTTCAATTAAGAAATATGAAGAAGTGA |
| EPI_ISL_337402   | >A/mallard/Novosibirsk_region/962k/2018_H12N5_2018-09-29<br>ATGGAGAAGTTCATTGTACTGAGTATAATCTCTAAACAACCTGGTCTTGCTTATGACAAGATTGGCATCGGCTACAGACGAATAA                   |
|                  | TCTAGGCAATCCCAAATGCGATCTTTACCTGAAATGGTAGAGAATGGTCATACATTTGTGAAAAGGCCAAGGAGATGGAAGGAATCTGCTATCCAGGATCAATAGAGAATCAAGAAGAGTTGAGATCATTTGTTCTCTTCAATTAAGAAATATGAAGAAGTGA |
| EPI_ISL_395083   | >A/mallard/Novosibirsk_region/964k/2018_H12N5_2018-09-29<br>ATGGAGAAGTTCATTGTACTGAGTATAATCTCTAAACAACCTGGTCTTGCTTATGACAAGATTGGCATCGGCTACAGACGAATAA                   |
|                  | TCTAGGCAATCCCAAATGCGATCTTTACCTGAAATGGTAGAGAATGGTCATACATTTGTGAAAAGGCCAAGGAGATGGAAGGAATCTGCTATCCAGGATCAATAGAGAATCAAGAAGAGTTGAGATCATTTGTTCTCTTCAATTAAGAAATATGAAGAAGTGA |
| EPI_ISL_400287   | >A/Shoveler/Chany_Lake/68/2019_H12N5_2019-09-07<br>ATGGAGAAGTTCATTGTACTGAGTATAATCTCTAAACAACCTGGTCTTGCTTATGACAAGATTGGCATCGGCTACAGACGAATAA                            |
|                  | TCTAGGCAATCCCAAATGCGATCTTTACCTGAAATGGTAGAGAATGGTCATACATTTGTGAAAAGGCCAAGGAGATGGAAGGAATCTGCTATCCAGGATCAATAGAGAATCAAGAAGAGTTGAGATCATTTGTTCTCTTCAATTAAGAAATATGAAGAAGTGA |
| EPI_ISL_400276   | >A/Gadwall/Buryatia/2206/2019_H12N5_2019-10-12<br>ATGGAGAAGTTCATTGTACTGAGTATAATCTCTAAACAACCTGGTCTTGCTTATGACAAGATTGGCATCGGCTACAGACGAATAA                             |
|                  | TCTAGGCAATCCCAAATGCGATCTTTACCTGAAATGGTAGAGAATGGTCATACATTTGTGAAAAGGCCAAGGAGATGGAAGGAATCTGCTATCCAGGATCAATAGAGAATCAAGAAGAGTTGAGATCATTTGTTCTCTTCAATTAAGAAATATGAAGAAGTGA |
| EPI_ISL_400280   | >A/mallard/Buryatia/2252/2019_H12N5_2019-10-13<br>ATGGAGAAGTTCATTGTACTGAGTATAATCTCTAAACAACCTGGTCTTGCTTATGACAAGATTGGCATCGGCTACAGACGAATAA                             |
|                  | TCTAGGCAATCCCAAATGCGATCTTTACCTGAAATGGTAGAGAATGGTCATACATTTGTGAAAAGGCCAAGGAGATGGAAGGAATCTGCTATCCAGGATCAATAGAGAATCAAGAAGAGTTGAGATCATTTGTTCTCTTCAATTAAGAAATATGAAGAAGTGA |
| EPI_ISL_400284   | >A/Common_Teal/Chany_Lake/40/2019_H12N5_2019-09-07<br>ATGGAGAAGTTCATTGTACTGAGTATAATCTCTAAACAACCTGGTCTTGCTTATGACAAGATTGGCATCGGCTACAGACGAATAA                         |
|                  | TCTAGGCAATCCCAAATGCGATCTTTACCTGAAATGGTAGAGAATGGTCATACATTTGTGAAAAGGCCAAGGAGATGGAAGGAATCTGCTATCCAGGATCAATAGAGAATCAAGAAGAGTTGAGATCATTTGTTCTCTTCAATTAAGAAATATGAAGAAGTGA |
| EPI_ISL_1241001  | >A/mallard/Novosibirsk_region/3541k/2020_H12N5_2020-08-29<br>ATGGAGAAGTTCATTGTACTGAGTATAATCTCTAAACAACCTGGTCTTGCTTATGACAAGATTGGCATCGGCTACAGACGAATAA                  |
|                  | TCTAGGCAATCCCAAATGCGATCTTTACCTGAAATGGTAGAGAATGGTCATACATTTGTGAAAAGGCCAAGGAGATGGAAGGAATCTGCTATCCAGGATCAATAGAGAATCAAGAAGAGTTGAGATCATTTGTTCTCTTCAATTAAGAAATATGAAGAAGTGA |
| EPI_ISL_7592096  | >A/Anas_platyrhynchos/Belgium/8751_0001/2020_H12N5_2020-08-27<br>ATGGAGAAGTTCATTGTACTGAGTATAATCTCTAAACAACCTGGTCTTGCTTATGACAAGATTGGCATCGGCTACAGACGAATAA              |
|                  | TCTAGGCAATCCCAAATGCGATCTTTACCTGAATGGTAGAGAATGGTCATACATTTGTGAAAAGGCCAAGGAGATGGAAGGAATCTGCTATCCAGGATCAATAGAGAATCAAGAAGAGTTGAGATCGTTGTTCTCTTCAATCAAGAATAATGAAGAAGTGA   |
| EPI_ISL_17982398 | >A/common_teal/Poland/P079w24_mixed_H12N5/2018_2018-09-14<br>ATGGAGAAGTTCATTGTACTGAGTATAATCTCTAAACAACCTGGTCTTGCTTATGACAAGATTGGCATCGGCTACAAACGAATAA                  |
|                  | TCTAGGCAATCCCAAATGCGATCTTTACCTGAAATGGTAGAGAATGGTCATACATTTGTGAAAAGGCCAAGGAGATGGAAGGAATCTGCTATCCAGGATCAATAGAGAATCAAGAAGAGTTGAGATCATTTGTTCTCTTCAATCAAGAATAATGAAGAAGTGA |
| EPI_ISL_17982402 | >A/common_teal/Poland/P079w25_mixed_H12N5/2018_2018-09-14<br>ATGGAGAAGTTCATTGTACTGAGTATAATCTCTAAACAACCTGGTCTTGCTTATGACAAGATTGGCATCGGCTACAGACGAATAA                  |
|                  | TCTAGGCAATCCCAAATGCGATCTTTACCTGAAATGGTAGAGAATGGTCATACATTTGTGAAAAGGCCAAGGAGATGGAAGGAATCTGCTATCCAGGATCAATAGAGAATCAAGAAGAGTTGAGATCATTTGTTCTCTTCAATCAAGAATAATGAAGAAGTGA |



|                |                                                                                                                                                                                                                                                                                                                                                                                                                                                                                                                                                                                                                                                                                                                                                                                                                                                                                                                                                                                                                                                                                                                                                                                                                                                                                                                                                                                                                                                                 |
|----------------|-----------------------------------------------------------------------------------------------------------------------------------------------------------------------------------------------------------------------------------------------------------------------------------------------------------------------------------------------------------------------------------------------------------------------------------------------------------------------------------------------------------------------------------------------------------------------------------------------------------------------------------------------------------------------------------------------------------------------------------------------------------------------------------------------------------------------------------------------------------------------------------------------------------------------------------------------------------------------------------------------------------------------------------------------------------------------------------------------------------------------------------------------------------------------------------------------------------------------------------------------------------------------------------------------------------------------------------------------------------------------------------------------------------------------------------------------------------------|
| EPI_ISL_243389 | >A/European_herring_gull/Netherlands/1/2010_H16N3_2010-12-18<br>ATGATGGTCAAAGTGCTCTACCTTCTCATCATAGTGTAGGCAGATACTCAAAGCAGACAAAATATGCATAGGATACCTGAGCAATAACTCAACAGATAAAGTAGATTACACTGACAGAAAATGGAGTTCCTGTGACCAGCTCAGTGGACCTTGTAAGAAACAAACCATACTGGAACATACTGCTCATTGAATGGGATCAGCCCGATCCATCTTGGTGACTGCAGTTTTGAGG<br>GATGGATTGTAGGAAACCCCTCTGTGCCACCAACTCAACATCAGAGAGTGGTCGTATTTAATCGAAGATCCTAATGCTCCTTAACAAACTCTGCTTCCAGGAGAAATTGGACAACAATGGTGAGCTGCGGCACCTTTTCAGTGGAGTAAACTCTTTTAGCAGGACAGAAATTGATAAGCCCCAGCAAATGGGGGAATGTCCTGGATGGAGTCACTGCTTCATGTCTCGACAG<br>AGGAGCAAGCAGTTTTTACAGGAATCTGGTCTGGCTGGTAAACAGAATGAGAGATATCCTGTTGTAAGAGGGGATTATAACAACACAACAGGACGAGATGTTTTGGTGATTTGGGGAATCCACCACCAGATTTCGGAAGCAACAGCCACAAAACATATATGTCACACAAAACCCCTACACATTAGTATCAACAAAAGAGTGGAGCAAACGCTATGAGCTCGAGATCGGGA<br>CCAGAATAGGTGACGACAAAAGAGTTGGATGAAAATATATTGGCACCTCATGCGCCAGGCGAAAGGATAACGTTTGAGAGCAATGGAGGGCTTCTAGCACCCAGATACGGATATATCATTGAGAAGTATGGTTACAGGACGAATTTTCCAAAGTGGAGTGAGGATGGCCAAATGCAACACAAAAGTGCCAAACGTCGTAGGTGGAATAAACACCAACAAAACCTTTCCA<br>GAACATAGACAGGAATGCCCTAGGAGAATGCCGGAAGTACATAAAGTCTGGGCAATTAACAACTTGCTACTGGCTGAGAAATGCCATCCATTAATGAAAGGGGTCTGTTTGGTGCAATTGCAGGATTATAGAGGGAGGGTGGCCTGGTCTGATCAATGGTGGTATGGTTTCCAGCATCAGAATGAACAAGGGACTGGCATTGCTGCAGATAAAGCTTCCACCCAGA<br>AAGCAATAAATGAAATAACAACGAAAAATTAACAACATAATAGAAAAATGAACGGAAATTATGATTCAATAAGAGGAGAATTCAATCAAGTAGAAAAAGAGAATCAACATGCTGGCTGATCGAGTTGATGATGCAGTAACCGATGTTTGGTCATACAATGCTAAACTTCTTGTA |
| EPI_ISL_243571 | >A/black-headed_gull/Netherlands/32/2009_H16N3_2009-07-09<br>ATGATGGTCAAAGTGCTCTACCTTCTCATCATAGTGTGGGCAGATACTCAAAGCAGACAAAATATGCATAGGATACCTGAGCAATAACTCAACAGATAAAGTAGATTACACTGACAGAAAATGGAGTTCCTGTGACCAGCTCAGTGGACCTTGTAAGAAACAAACCATACTGGAACATACTGCTCATTGAATGGGATCAGCCCGTCCATCTTGGTGACTGCAGTTTTGAGG<br>GATGGATTGTAGGAAACCCCTCTGTGCCACCAACTCAACATCAGAGAGTGGTCGTATTTAATCGAAGATCCTAATGCTCCTTAACAAACTCTGCTTCCAGGAGAGTTGGACAACAATGGTGAGCTGCGGCACCTTTTCAGTGGAGTAAACTCTTTTAGCAGGACAGAAATTGATAAGCCCCAGCAAATGGGGGAATGTCCTGGATGGAGTCACTGCTTCATGTCTCGACAG<br>AGGAGCAAGCAGTTTTTACAGGAATCTGGTCTGGTGGTAAACAGAATGAGAGATATCCTGTTGTAAGAGGGGATTATAACAACACAACAGGACGAGATGTTTTGGTGATTTGGGGAATCCACCACCAGATTTCGGAAGCAACAGCCACAAAACATATATGTCACACAAAACCCCTACACATTAGTATCAACAAAAGAGTGGAGCAAACGCTATGAGCTCGAGATCGGGA<br>CCAGAATAGGTGACGACAAAAGAGTTGGATGAAAATATATTGGCACCTCATGCGCCAGGCGAAAGGATAACGTTTGAGAGCAATGGAGGGCTTCTAGCACCCAGATACGGATATATCATTGAGAAGTATGGTTACAGGACGAATTTCCAGAGTGGAGTGAGGATGGCCAAATGCAACACAAAATGCCAAACGTC                                                                                                                                                                                                                                                                                                                                                                                                                                                                  |
| EPI_ISL_243578 | >A/black-headed_gull/Netherlands/3/2010_H16N3_2010-07-14<br>ATGATGGTCAAAGTGCTCTACCTTCTCATCATAGTGTGGGCAGATACTCAAAGCAGACAAAATATGCATAGGATACCTGAGCAATAACTCAACAGATAAAGTAGATTACACTGACAGAAAATGGAGTTCCTGTGACCAGCTCAGTGGACCTTGTAAGAAACAAACCATACTGGAACATACTGCTCATTGAATGGGATCAGCCCGTCCATCTTGGTGACTGCAGTTTTGAGG<br>GATGGATTGTAGGAAACCCCTCTGTGCCACCAACTCAACATCAGAGAGTGGTCGTATTTAATCGAAGATCCTAATGCTCCTTAACAAACTCTGCTACCCAGGAGAAATTGGACAACAATGGTGAGCTGCGGCACCTTTTCAGTGGAGTAAACTCTTTTAGCAGGACAGAAATTGATAAGCCCCAGCAAATGGGGGAATGTCCTGGATGGAGTCACTGCTTCATGTCTCGACAG<br>AGGAGCAAGCAGTTTTTACAGGAATCTGGTCTGGTGGTAAACAGAATGAGAGATATCCTGTTGTAAGAGGGGATTATAACAACACAACAGGACGAGATGTTTTGGTGATTTGGGGAATCCACCACCAGATTTCGGAAGCAACAGCCACAAAACATATATGTCACACAAAACCCCTACACATTAGTATCAACAAAAGAGTGGAGCAAACGCTATGAGCTCGAGATCGGGA<br>CCAGAATAGGTGACGACAAAAGAGTTGGATGAAAATATATTGGCACCTCATGCGCCAGGCGAAAGGATAACGTTTGAGAGCAATGGAGGGCTTCTAGCACCCAGATACGGATATATCATTGAGAAGTATGGTTACAGGACGAATTTCCAGAGTGGAGTGAGGATGGCCAAATGCAACACAAAATGCCAAACGTC                                                                                                                                                                                                                                                                                                                                                                                                                                                                 |
| EPI_ISL_267770 | >A/black-headed_gull/Netherlands/18/2014_H16N3_2014-12-24<br>ATGGTGGTCAAAGTGCTTTACCTTCTCATCATAGTGTGGGCAGATACTCAAAGCAGACAAAATATGCATAGGATACCTGAGCAATAACTCAACAGATAAAGTGGATACACTGACAGAAAATGGAGTTCCTGTGACCAGCTCAGTGGACCTTGTAAGACAAACCATACTGGAACATACTGCTCTTTGAATGGAATCAGCCCGTCCATCTTGGTGACTGCAGTTTTGAGG<br>GATGGATTGTAGGAAACCCCTCTGTGCCACCAATATCAACATCAGAGAGTGGTCGTATTTAATGAGAAGATCCTAATGCTCCTTAACAAACTCTGTTTCCAGGAGAGTTGGACAACAATGGTGAGCTGCGGCACCTTTTCAGTGGAGTAAACTCTTTTAGCAGGACAGAAATTGATAAGCCCCAGCAAATGGGGGAATGTCCTGGATGGAGTCACTGCTTCATGTCTCGACAG<br>AGGAGCAAGCAGTTTTTACAGGAATCTGGTCTGGCTGGTAAACAGAATGATAGGTATCCAGTTGTAAGAGGGGATTATAACAACACAACAGGACGAGATGTTTTGGTGATTTGGGGAATCCACCACCAGATTTCAGAAGCAACAGCCACAAAACATATATGTCACACAAAACCCCTACACATTAGTATCAACAAAAGAGTGGAGCAAACGCTATGAGCTCGAAATCGGGA<br>CAAGAATAGGTGACGACAAAAGAGTTGGATGAAAATATATTGGCACCTCATGCGCCAGGCGAAAGGATAACGTTTGAGAGCAATGGAGGGCTTCTAGCACCCAGATACG                                                                                                                                                                                                                                                                                                                                                                                                                                                                                                                                                       |
| EPI_ISL_243433 | >A/black-headed_gull/Netherlands/11/2010_H16N3_2010-07-21<br>ATGATGGTCAAAGTGCTCTACCTTCTCATCATAGTGTGGGCAGATACTCAAAGCAGACAAAATATGCATAGGATACCTGAGCAATAACTCAACAGATAAAGTAGATTACACTGACAGAAAATGGAGTTCCTGTGACCAGCTCAGTGGACCTTGTAAGAAACAAACCATACTGGAACATACTGCTCATTGAATGGGATCAGCCCGTCCATCTTGGTGACTGCAGTTTTGAGG<br>GATGGATTGTAGGAAACCCCTCTGTGCCACCAACTCAACATCAGAGAGTGGTCGTATTTAATCGAAGATCCTAATGCTCCTTAACAAACTCTGCTTCCAGGAGAAATTGGACAACAATGGTGAGCTGCGGCACCTTTTCAGTGGAGTAAACTCTTTTAGCAGGACAGAAATTGATAAGCCCCAGCAAATGGGGGAATGTCCTGGATGGAGTCACTGCTTCATGTCTCGACAG<br>AGGAGCAAGCAGTTTTTACAGGAATCTGGTCTGGCTGGTAAACAGAATGAGAGATATCCTGTTGTAAGAGGGGATTATAACAACACAACAGGACGAGATGTTTTGGTGATTTGGGGAATCCACCACCAGATTTCGGAAGCAACAGCCACAAAACATATATGTCACACAAAACCCCTACACATTAGTATCAACAAAAGAGTGGAGCAAACGCTATGAGCTCGAGATCGGGA<br>CCAGAGTAGGTGACGACAAAAGAGTTGGATGAAAATATATTGGCACCTCATGCGCCAGGCGAAAGGATAACGTTTGAGAGCAATGGAGGGCTTCTAGCACCCAGATACGGATATATCATTGAGAAGTATGGTTACAGGACGAATTTCCAGAGTGGAGTGAGGATGGCCAAATGCAACACAAAATGCCAAACGTC                                                                                                                                                                                                                                                                                                                                                                                                                                                                |
